# Supplementary material
Source: ML conference proceedings conference paper supplement (https://openreview.net/forum?id=3lskwxB653)
Supplement: supplementary_material [file overview.pdf › RoMA_Code/visuals/figures/overview.pdf]

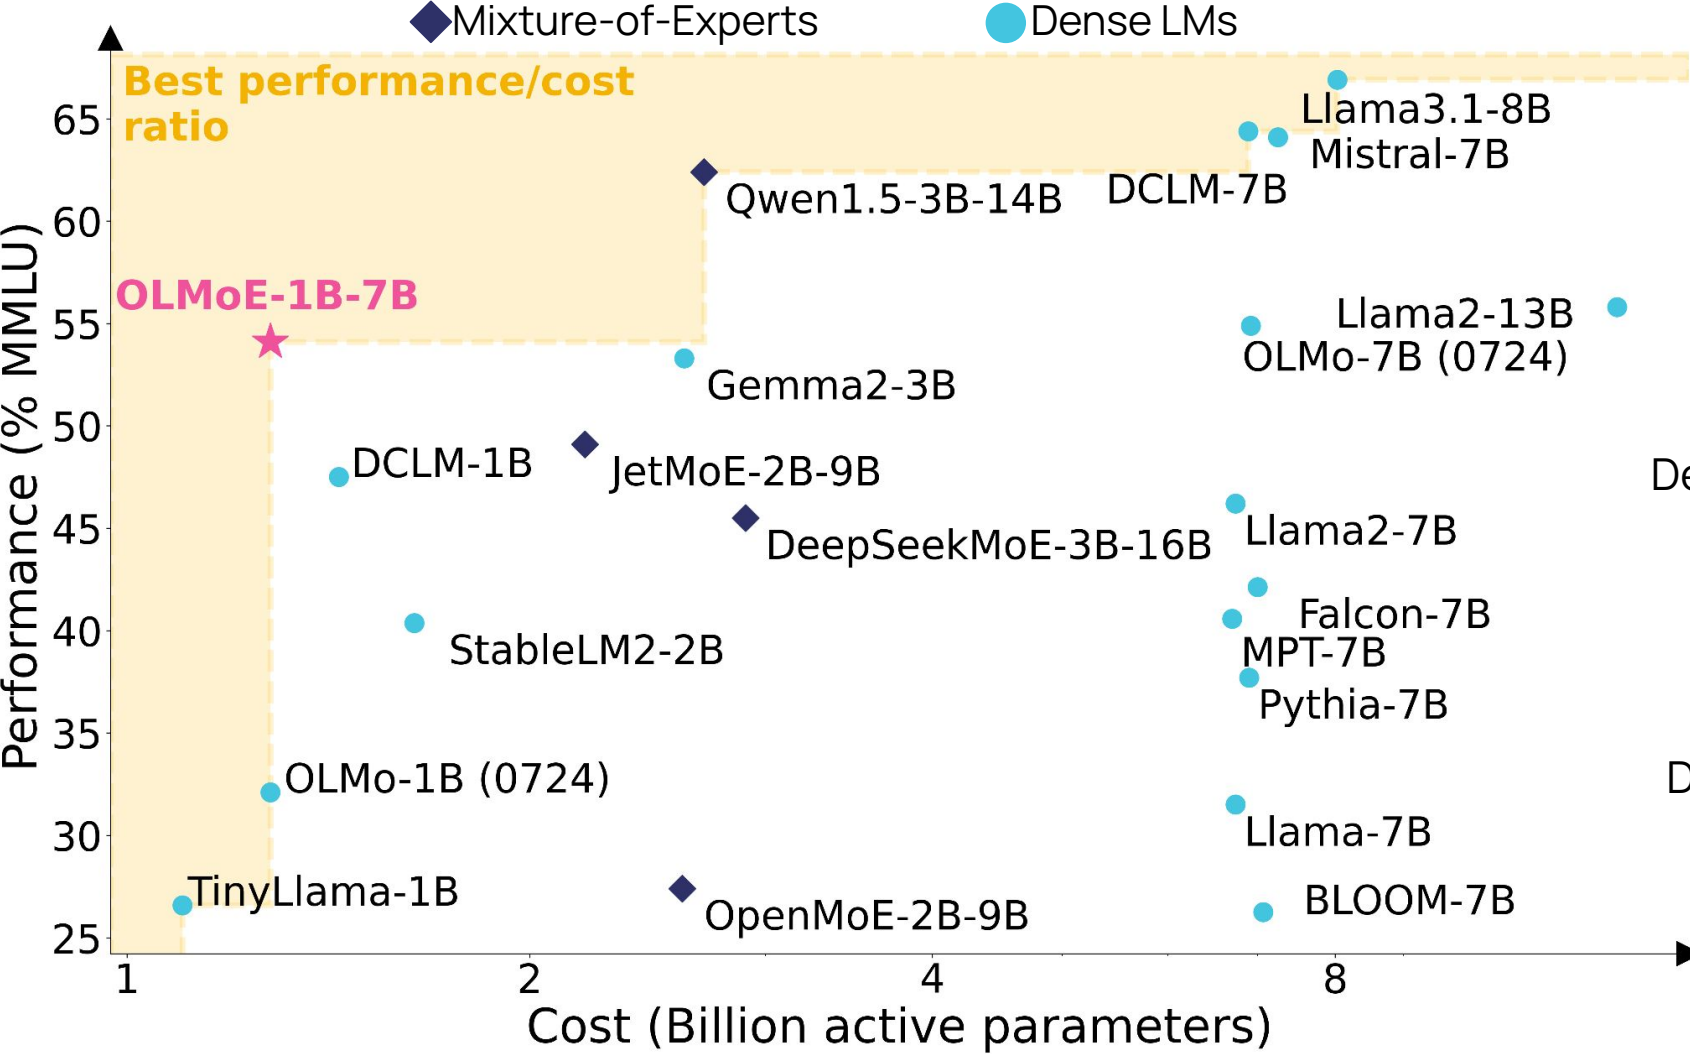

| How open are open MoEs? |       |      |      |      |        |
|-------------------------|-------|------|------|------|--------|
| Name                    | Model | Data | Code | Logs | #ckpts |
| Grok-86B-314B           | ✓     | ✗    | ✗    | ✗    | 1      |
| Mixtral-39B-141B        | ✓     | ✗    | ✗    | ✗    | 1      |
| DBRX-36B-132B           | !!    | ✗    | ✗    | ✗    | 1      |
| Skywork-22B-146B        | !!    | ✗    | ✗    | ✗    | 1      |
| DeepSeekV2-21B-236B     | !!    | ✗    | ✗    | ✗    | 1      |
| Arctic-17B-480B         | ✓     | !!   | ✗    | ✗    | 1      |
| Qwen2-14B-57B           | ✓     | ✗    | ✗    | ✗    | 1      |
| Mixtral-13B-47B         | ✓     | ✗    | ✗    | ✗    | 1      |
| Jamba-12B-52B           | ✓     | ✗    | ✗    | ✗    | 1      |
| DeepSeekMoE-3B-16B      | !!    | ✗    | ✗    | ✗    | 1      |
| Qwen1.5-3B-14B          | !!    | ✗    | ✗    | ✗    | 1      |
| OpenMoE-3B-9B           | ✓     | ✓    | ✓    | ✗    | 6      |
| JetMoE-2B-9B            | ✓     | !!   | !!   | ✗    | 1      |
| OLMoE-1B-7B             | ✓     | ✓    | ✓    | ✓    | 244    |
