# Supplementary material
Source: ML conference proceedings conference paper supplement (https://openreview.net/forum?id=3lskwxB653)
Supplement: supplementary_material [file poster_iclr2025.pdf › RoMA_Code/visuals/poster_iclr2025.pdf]

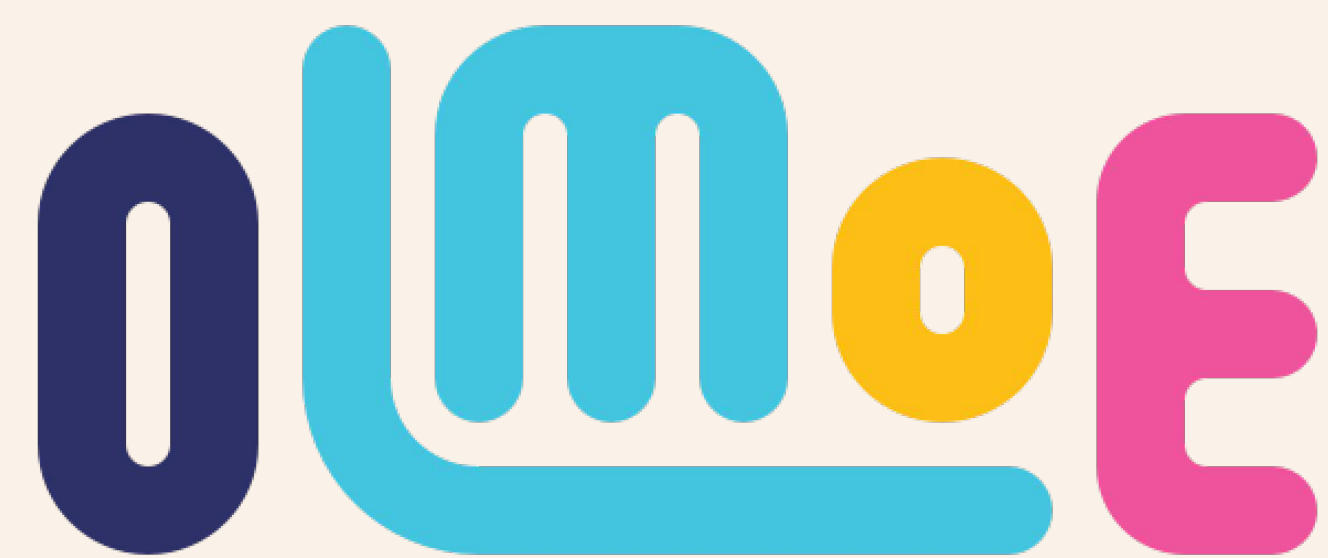

# Open Mixture-of-Experts Language Models

## Number of Experts?

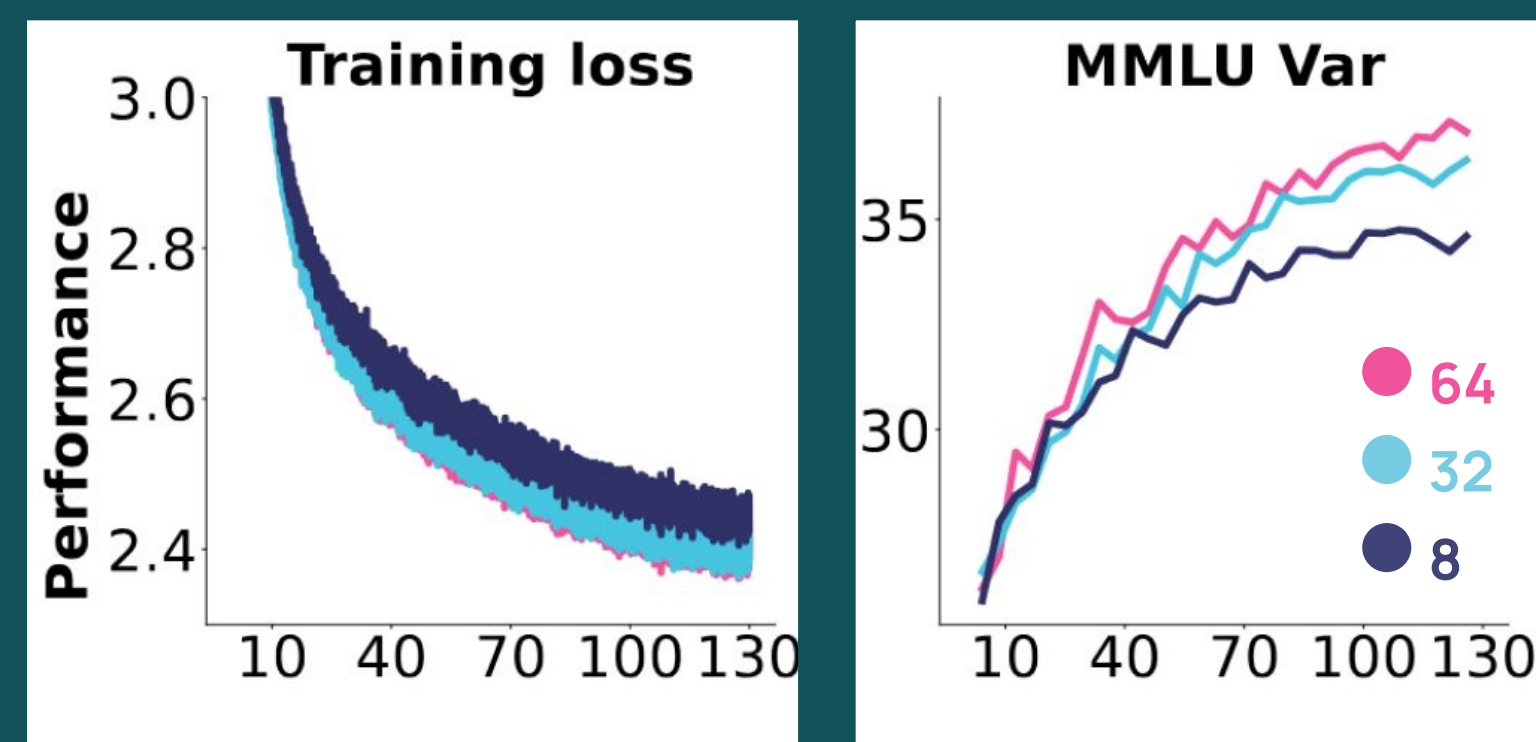

## Sparse Upcycling?

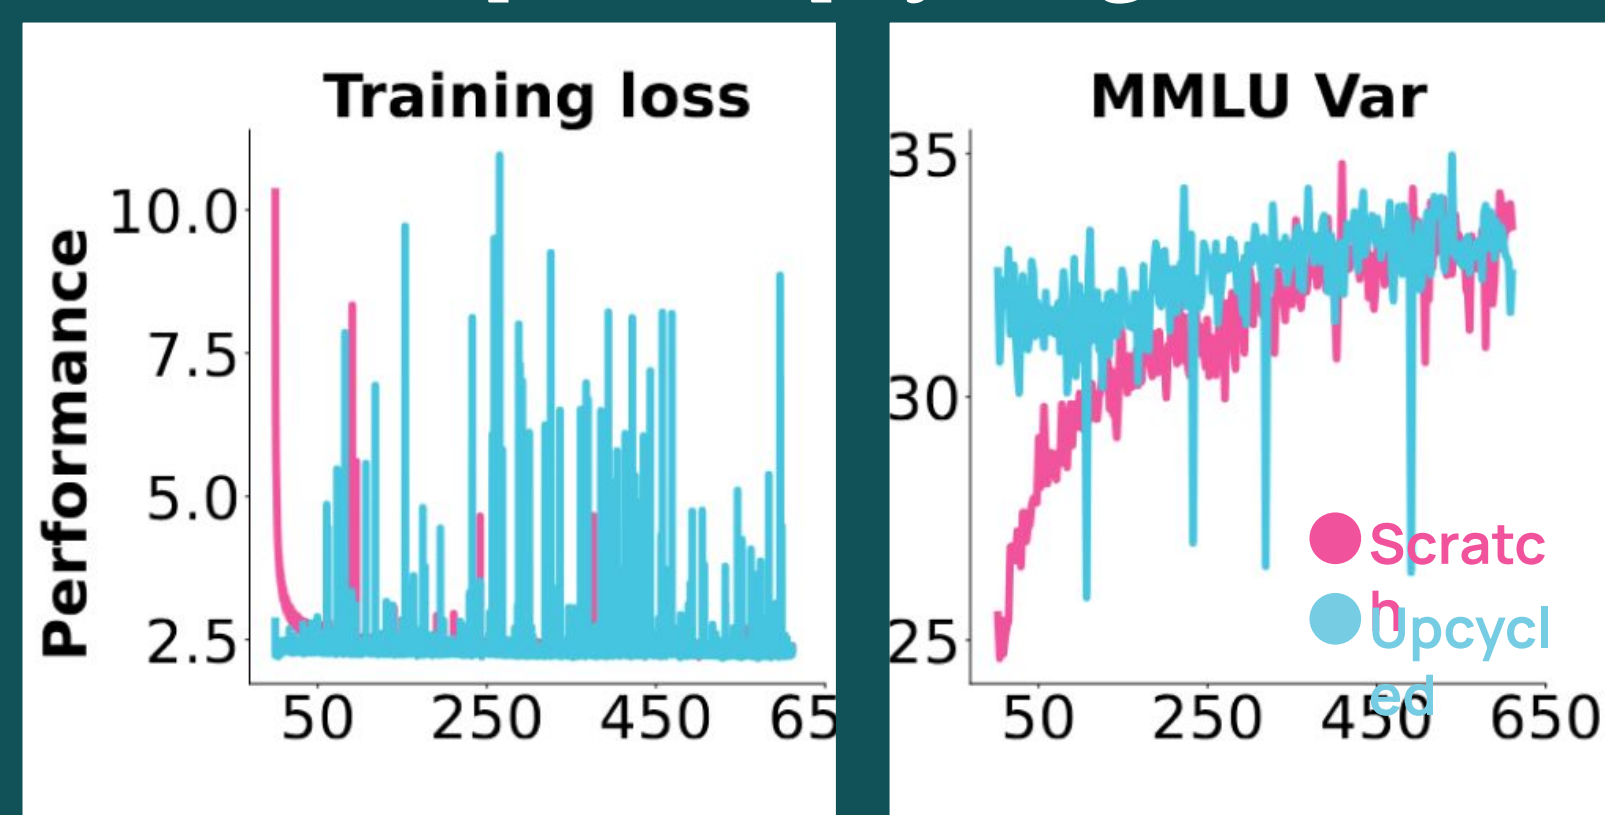

Niklas Muennighoff,

Luca Soldaini, Dirk Groeneveld, Kyle Lo,

Jacob Morrison, Sewon Min, Weijia Shi,

Pete Walsh, Oyvind Tafjord, Nathan Lambert,

Yuling Gu, Shane Arora, Akshita Bhagia,

Dustin Schwenk, David Wadden, Alexander Wettig,

Binyuan Hui, Tim Dettmers, Douwe Kiela, Ali Farhadi,

Noah A. Smith, Pang Wei Koh, Amanpreet Singh,

Hannaneh Hajishirzi

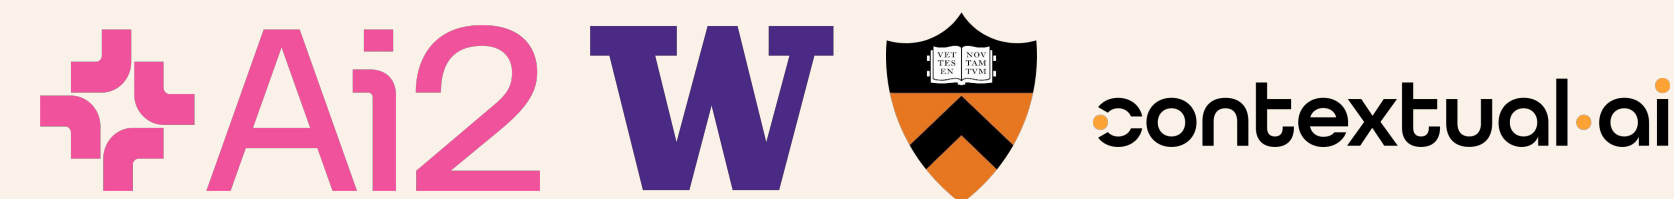

## Domain Specialization?

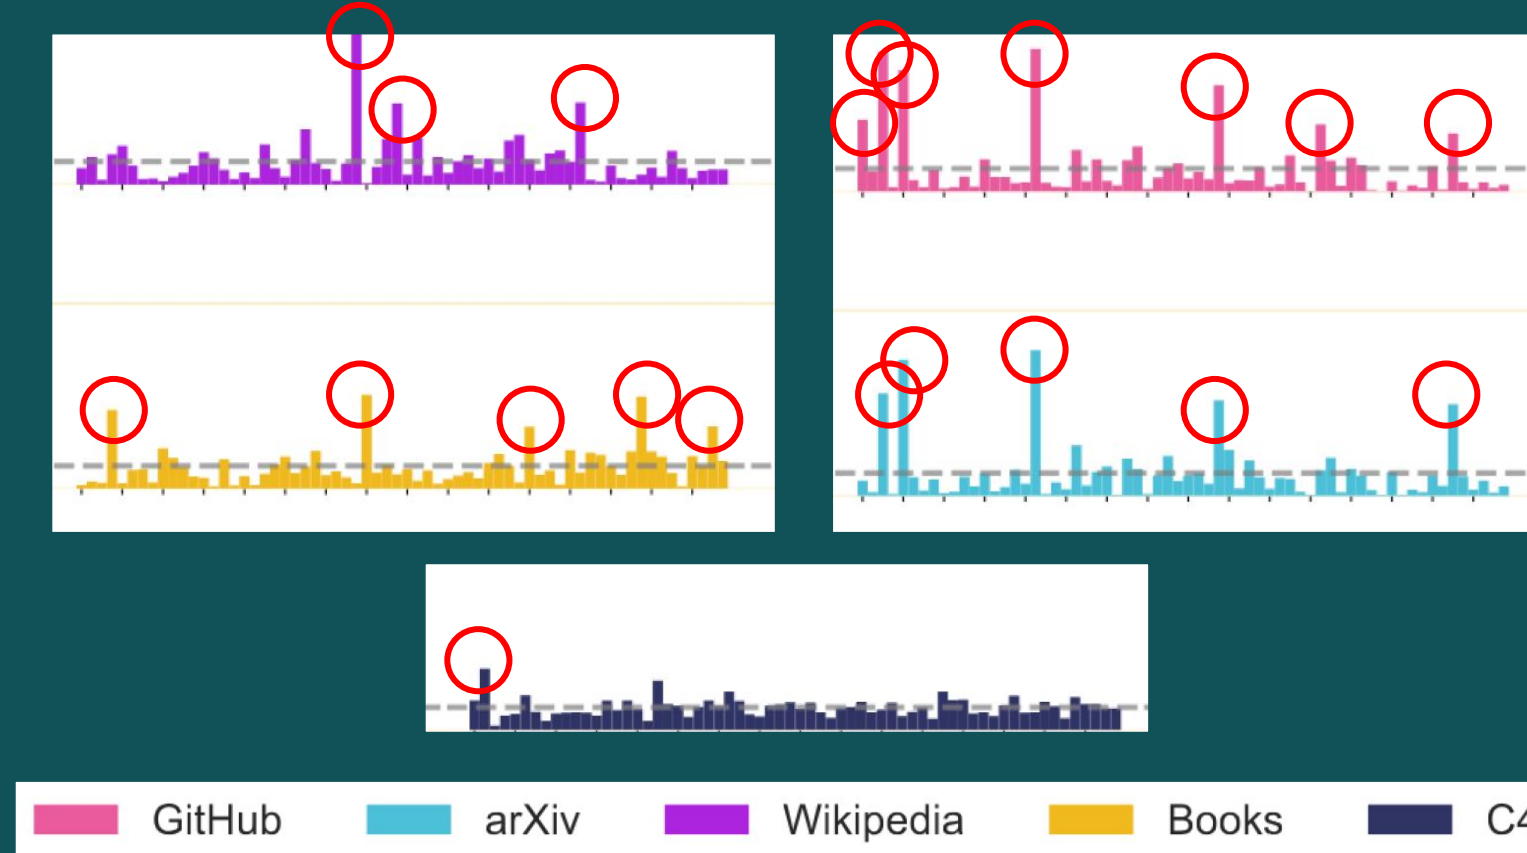

## Token Choice vs Expert Choice?

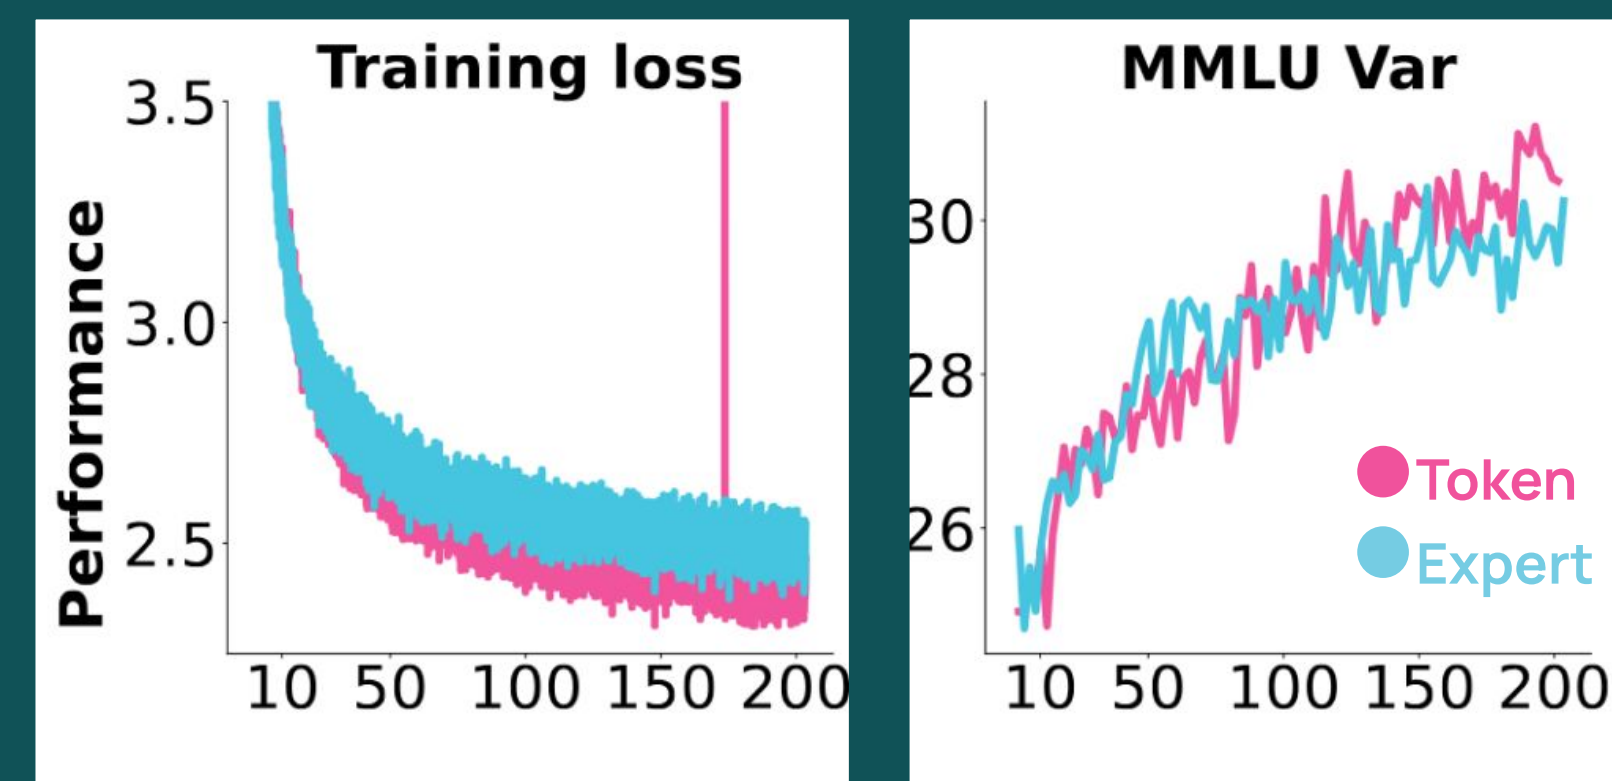

Runs locally 110 tokens per second on your iPhone! 👉

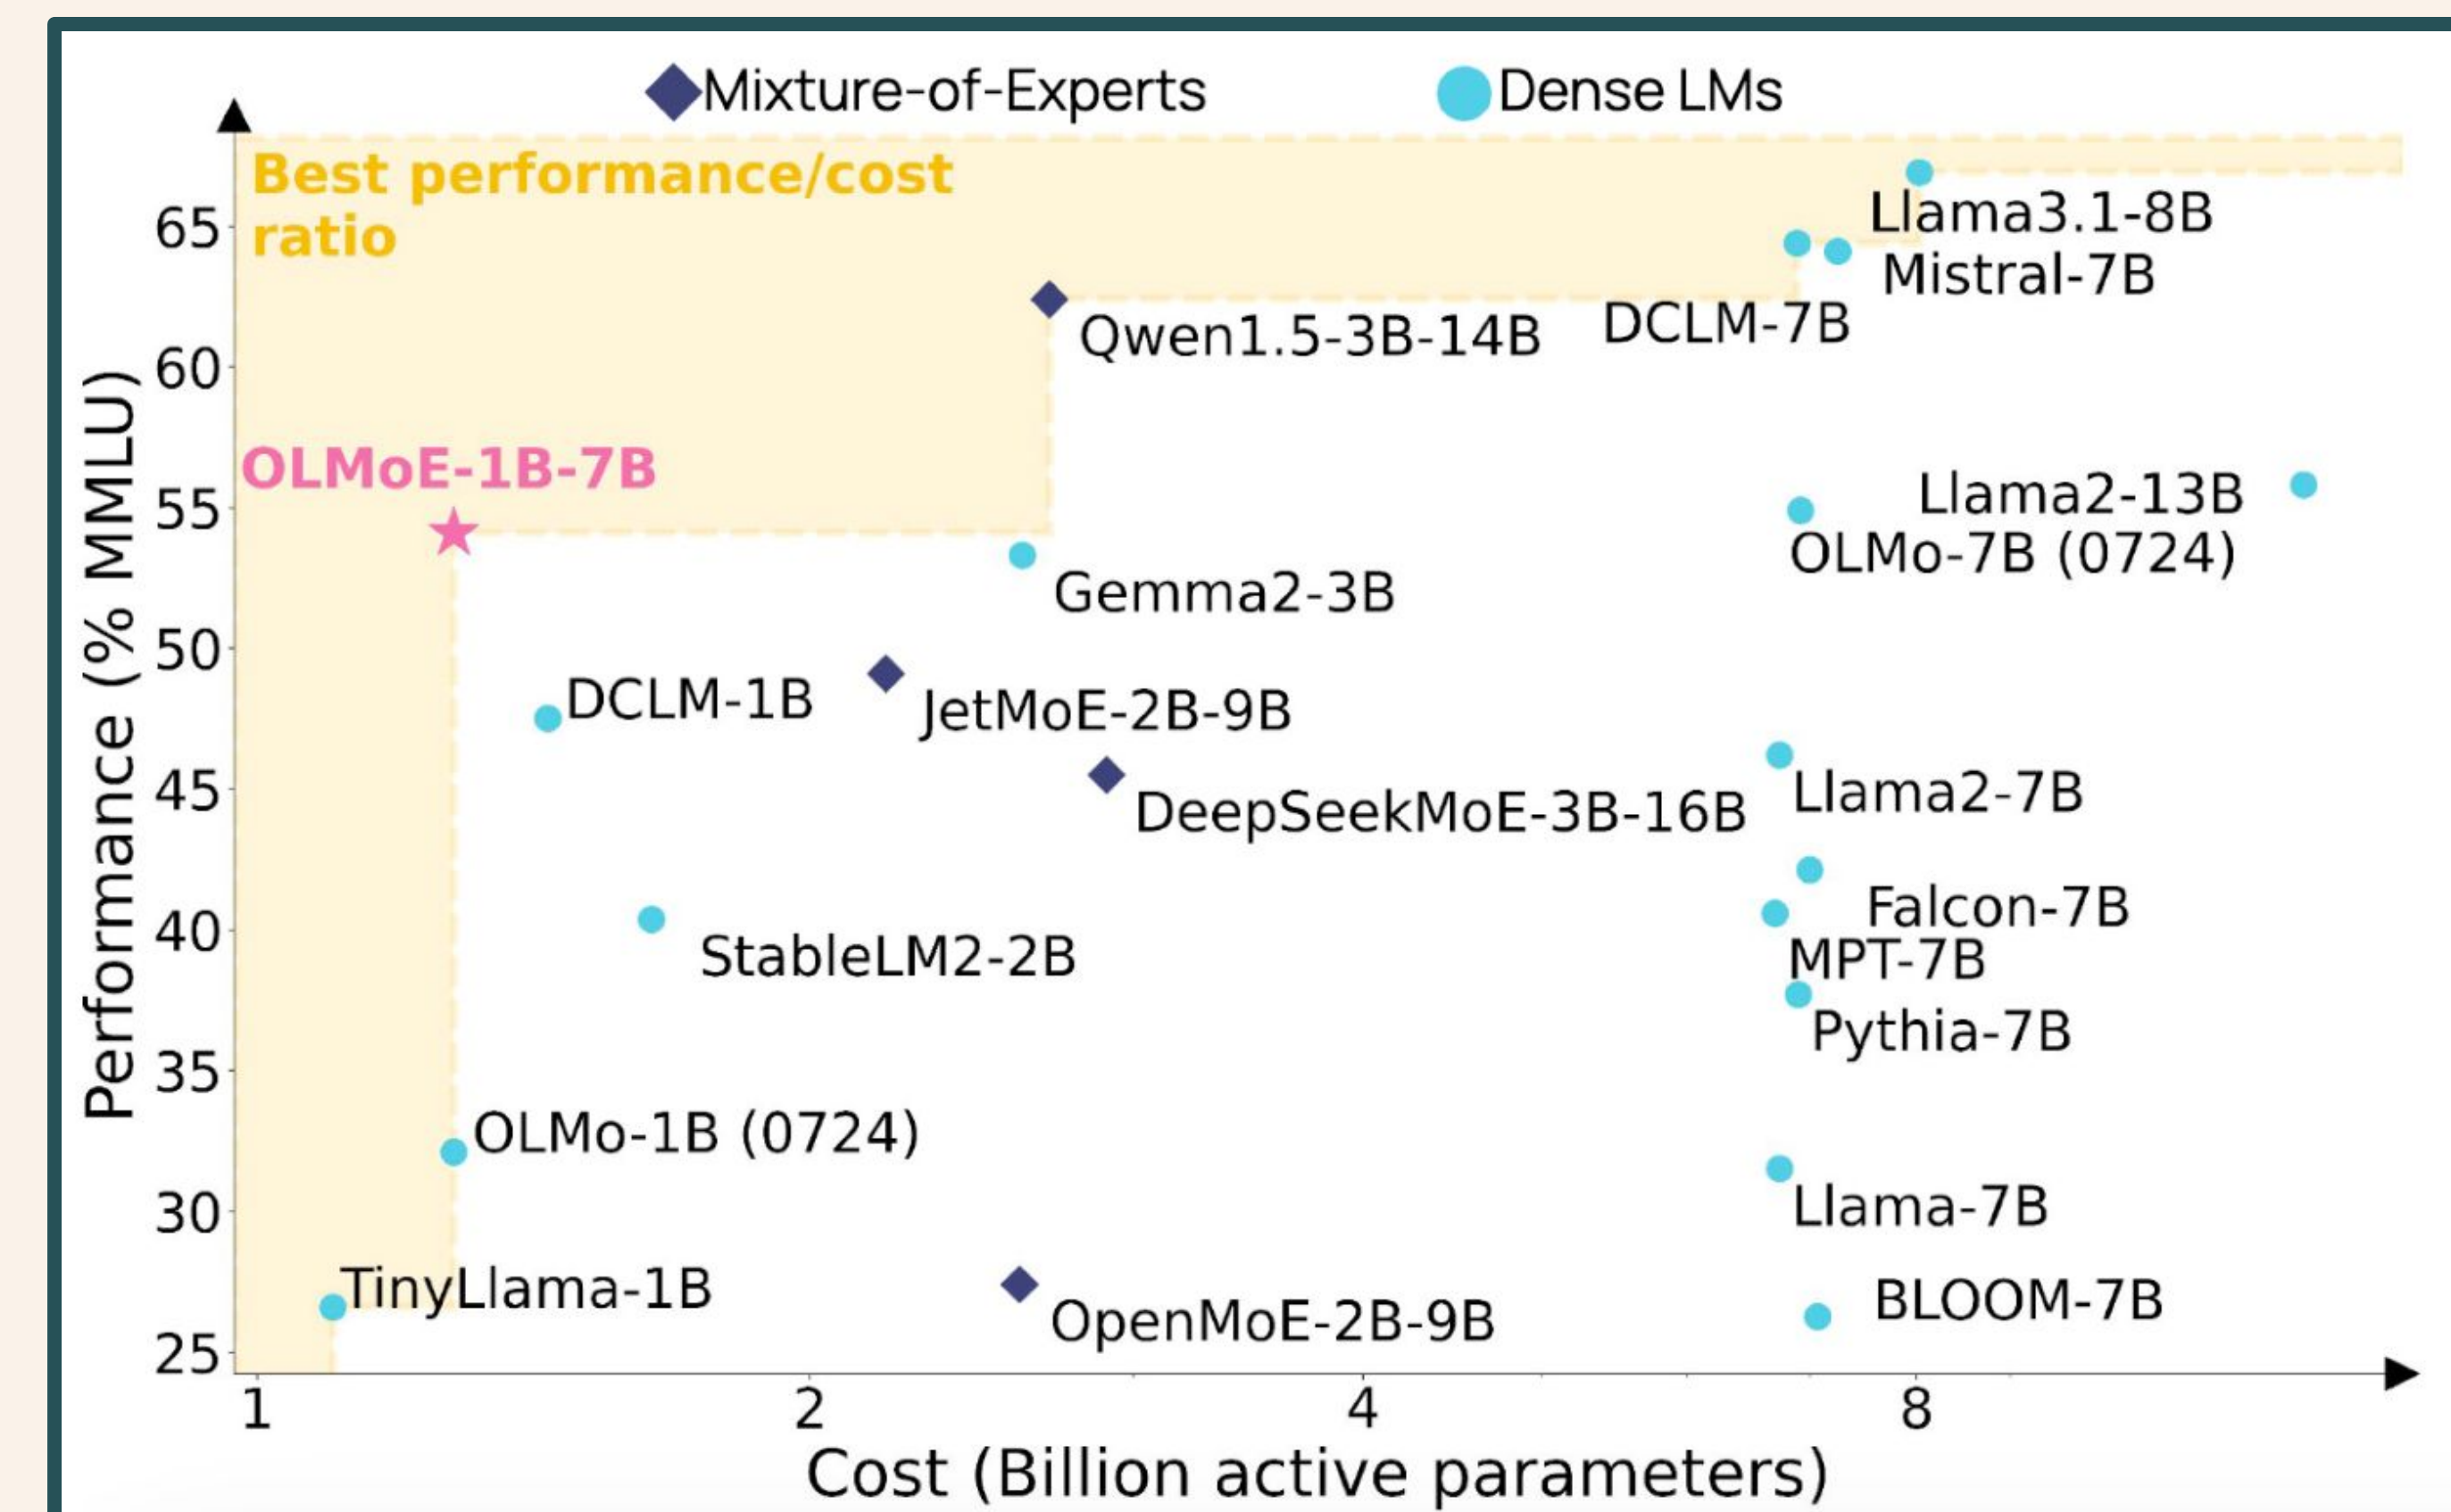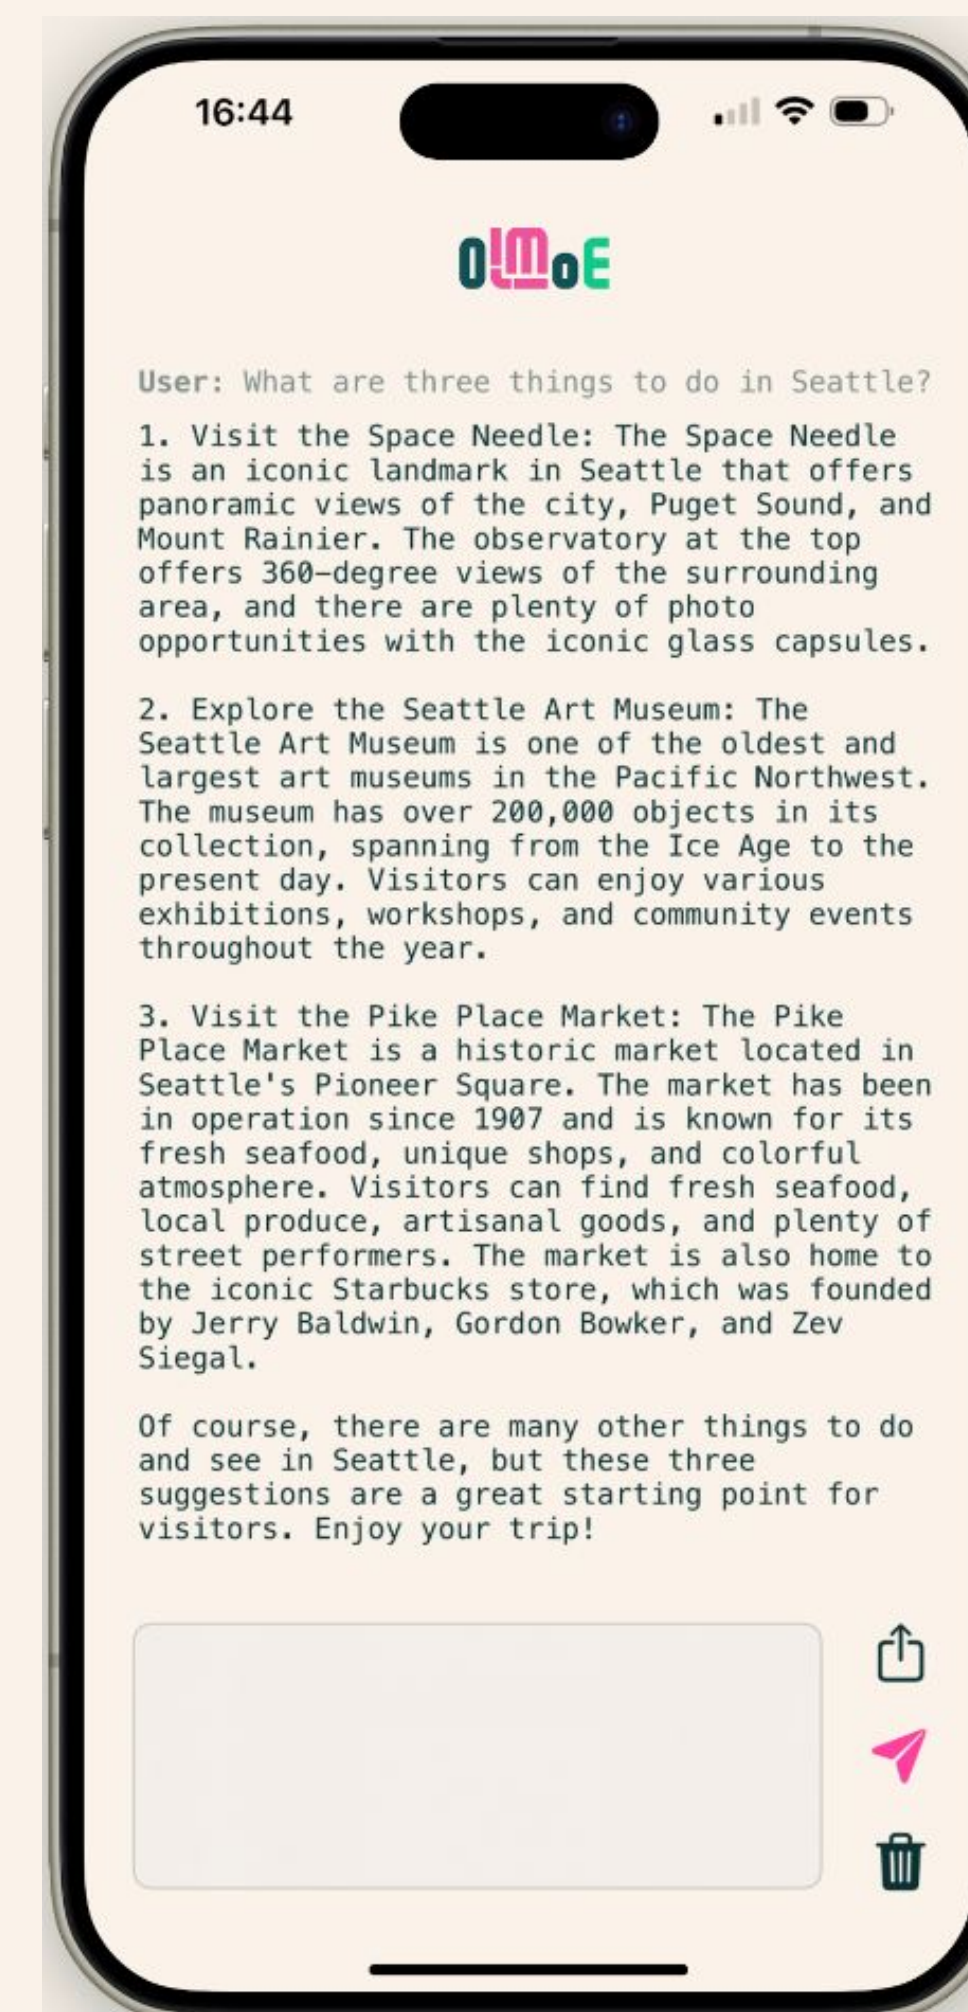

## How open are open MoEs?

| Name                | Model | Data | Code | Logs | #ckpts |
|---------------------|-------|------|------|------|--------|
| Grok-86B-314B       | ✓     | ✗    | ✗    | ✗    | 1      |
| Mixtral-39B-141B    | ✓     | ✗    | ✗    | ✗    | 1      |
| DBRX-36B-132B       | !!    | ✗    | ✗    | ✗    | 1      |
| Skywork-22B-146B    | !!    | ✗    | ✗    | ✗    | 1      |
| DeepSeekV2-21B-236B | !!    | ✗    | ✗    | ✗    | 1      |
| Arctic-17B-480B     | ✓     | !!   | ✗    | ✗    | 1      |
| Qwen2-14B-57B       | ✓     | ✗    | ✗    | ✗    | 1      |
| Mixtral-13B-47B     | ✓     | ✗    | ✗    | ✗    | 1      |
| Jamba-12B-52B       | ✓     | ✗    | ✗    | ✗    | 1      |
| DeepSeekMoE-3B-16B  | !!    | ✗    | ✗    | ✗    | 1      |
| Qwen1.5-3B-14B      | !!    | ✗    | ✗    | ✗    | 1      |
| OpenMoE-3B-9B       | ✓     | ✓    | ✓    | ✗    | 6      |
| JetMoE-2B-9B        | ✓     | !!   | !!   | ✗    | 1      |
| OLMoE-1B-7B         | ✓     | ✓    | ✓    | ✓    | 244    |
