# Supplementary material
Source: ML conference proceedings conference paper supplement (https://openreview.net/forum?id=3lskwxB653)

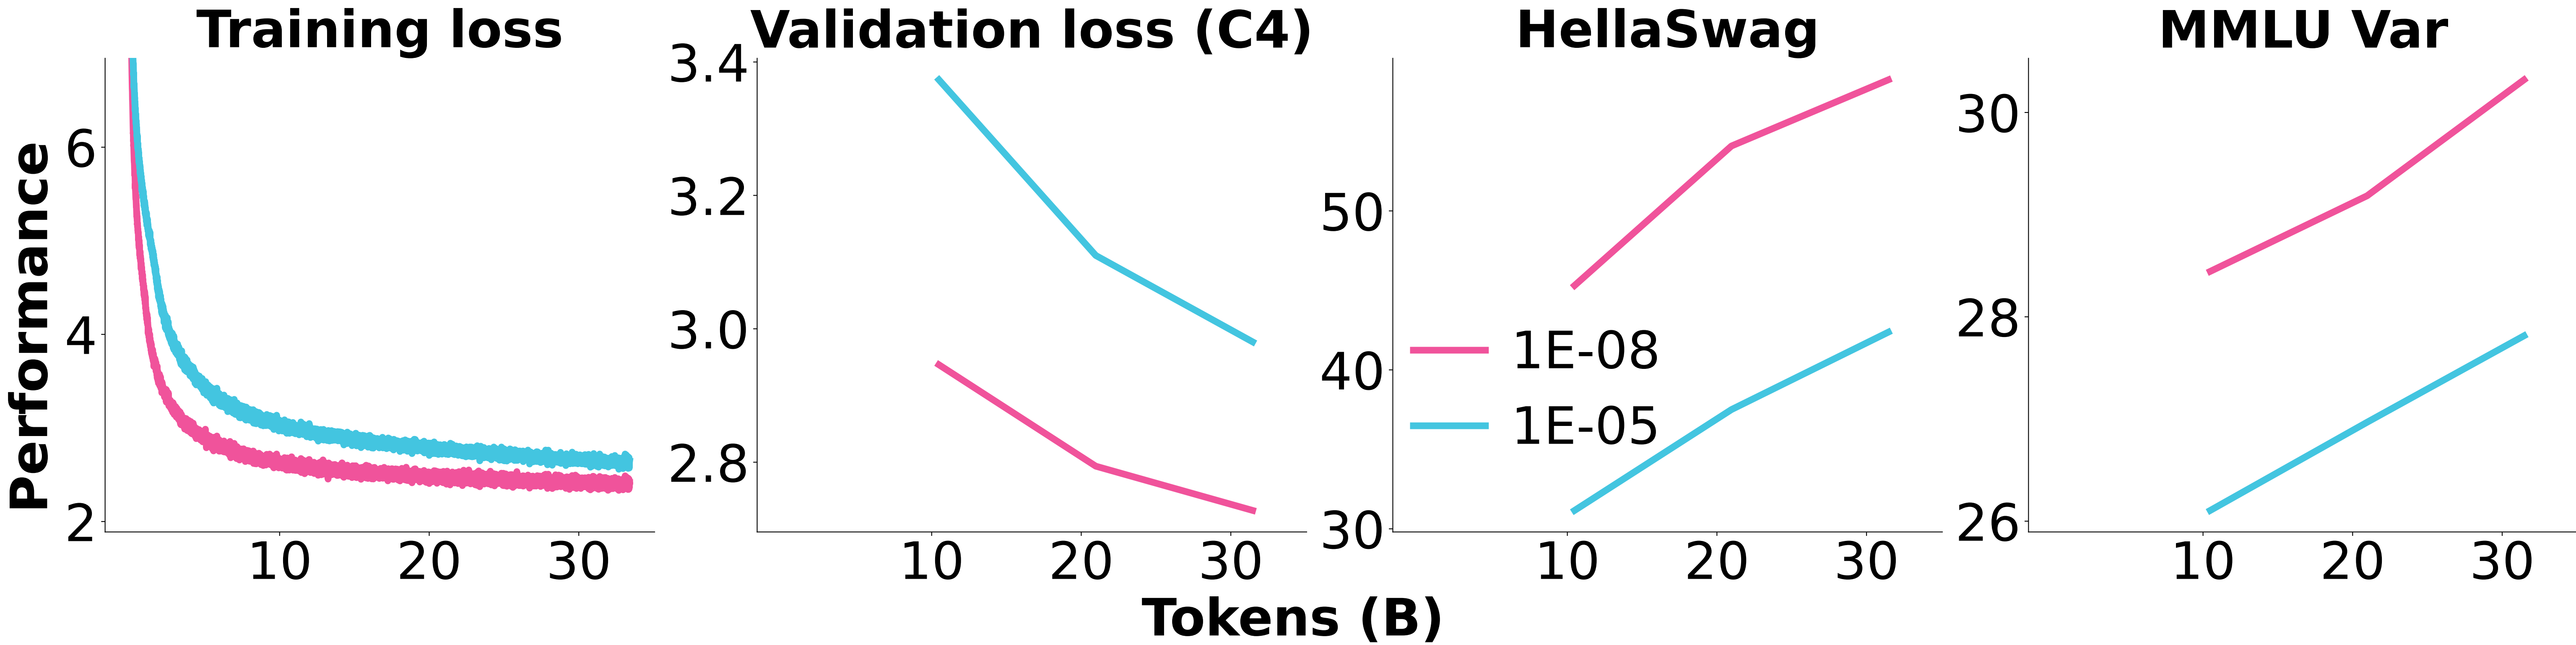

Supplement: supplementary_material [file adamweps.pdf › RoMA_Code/visuals/figures/adamweps.pdf]

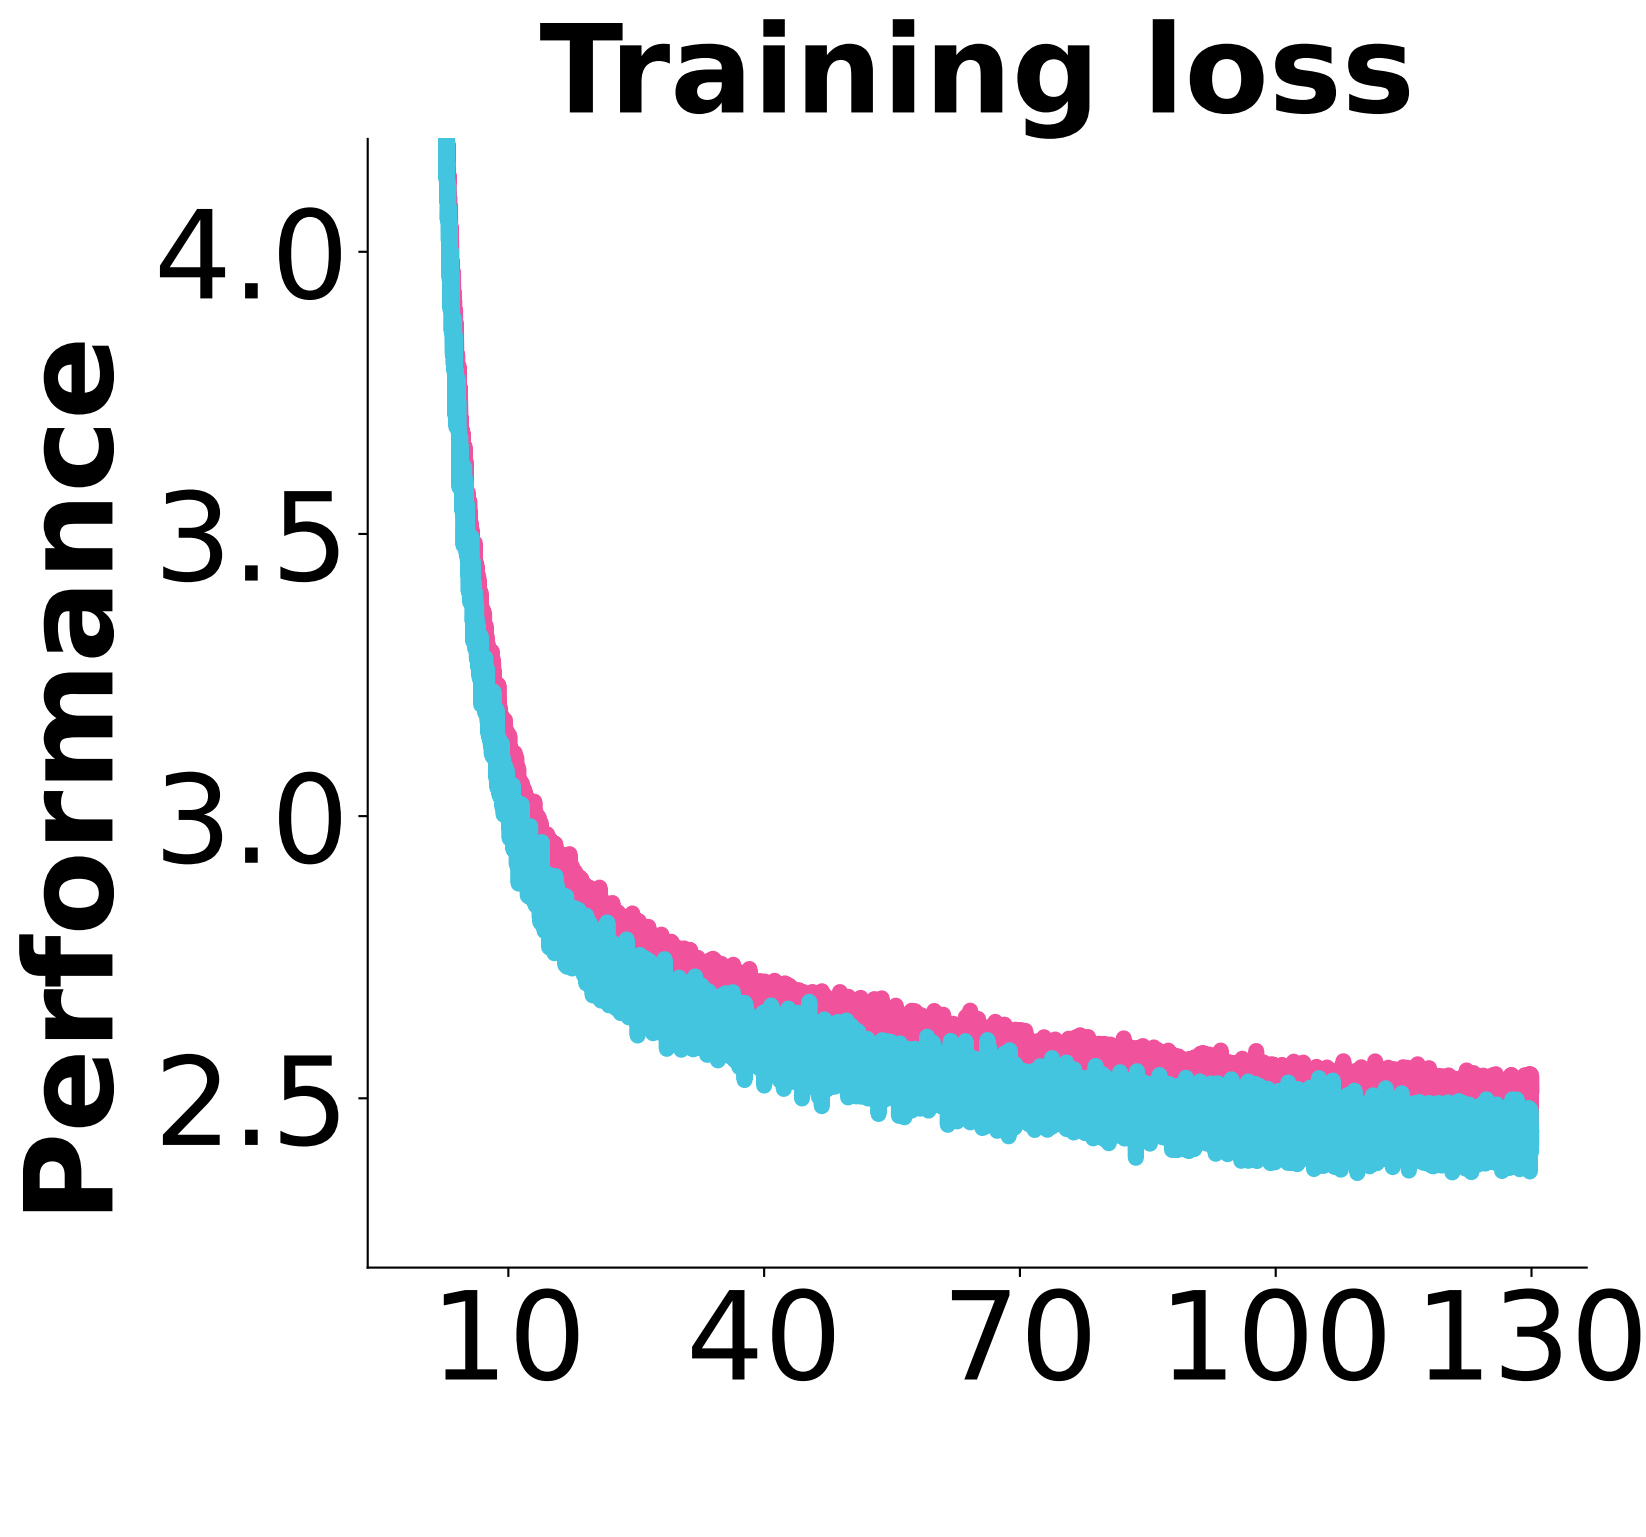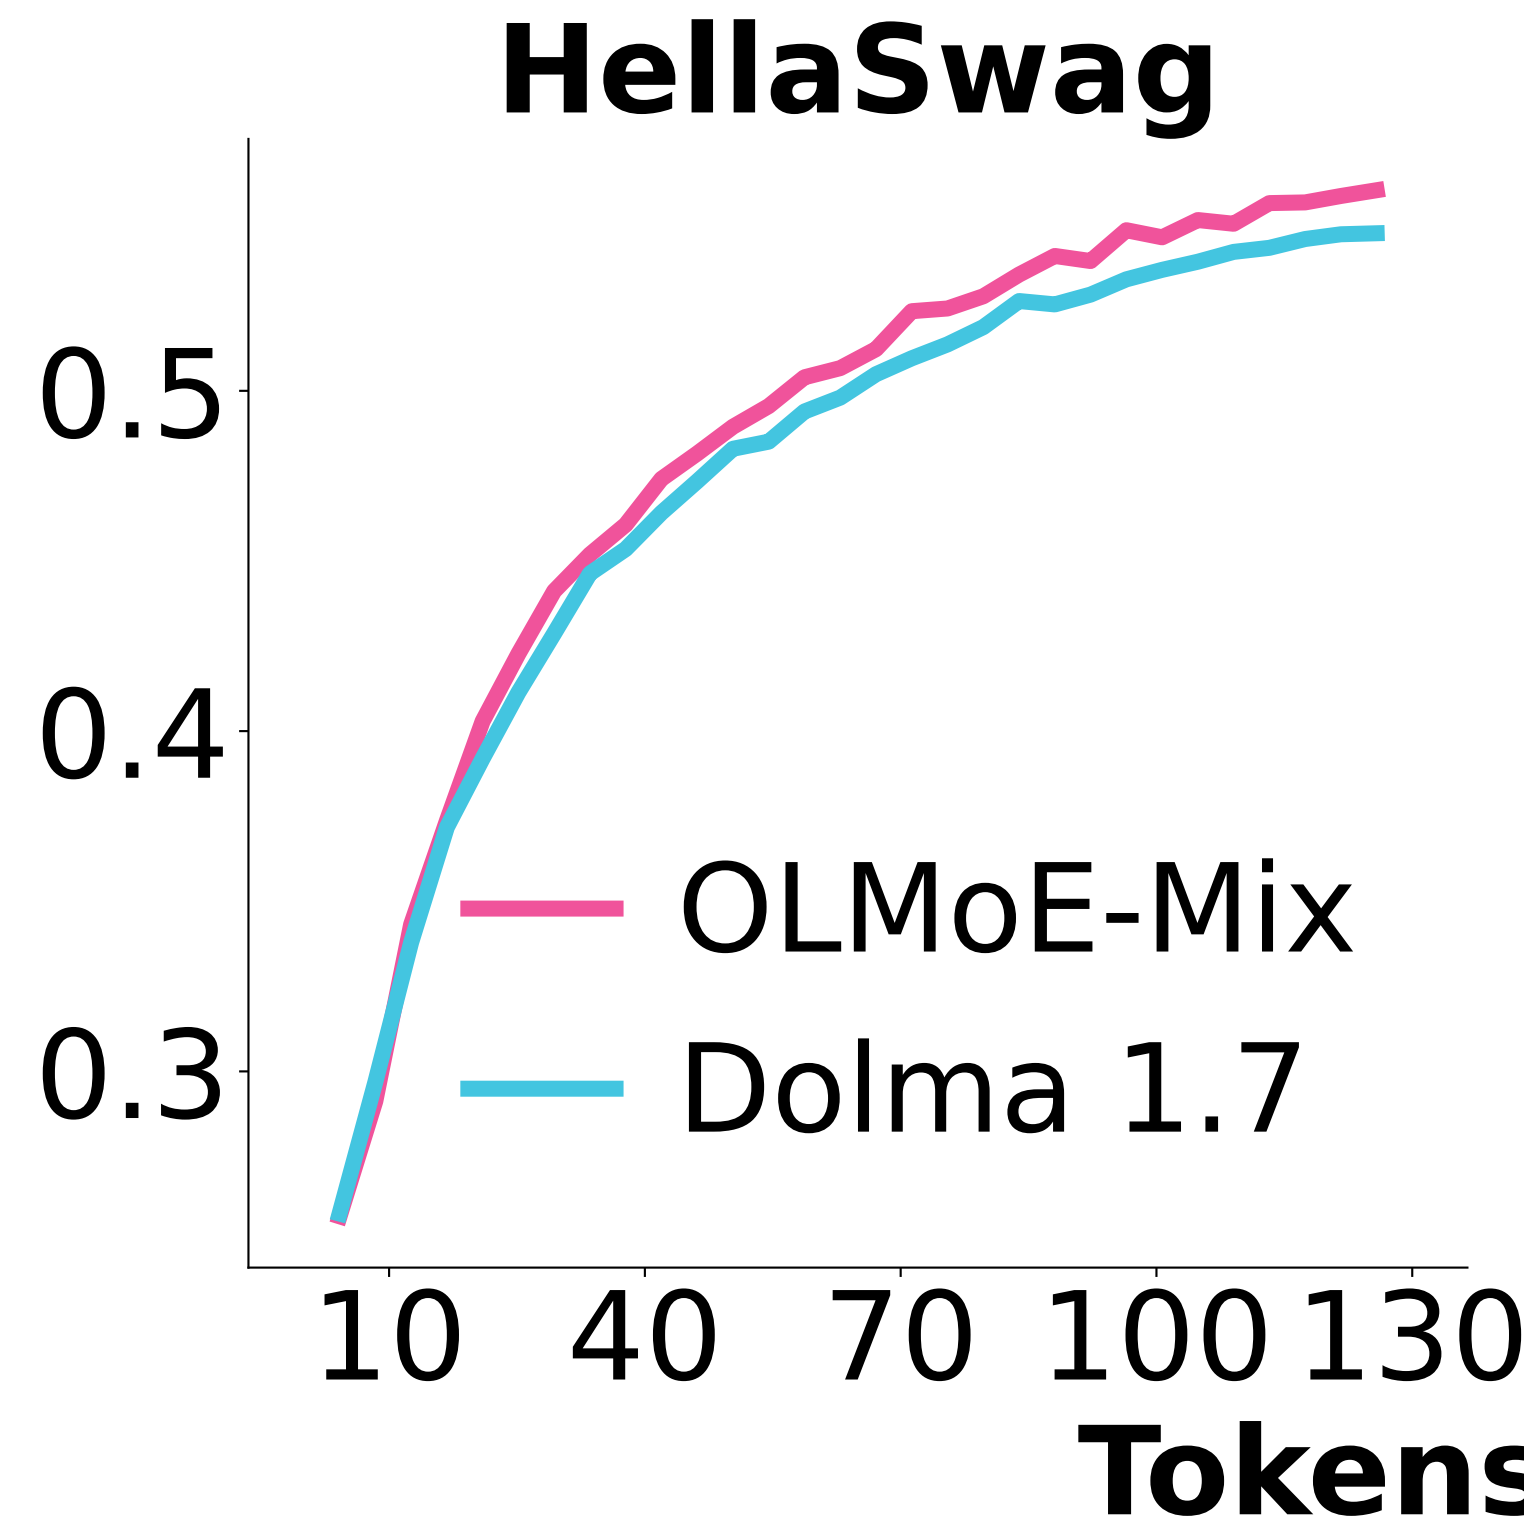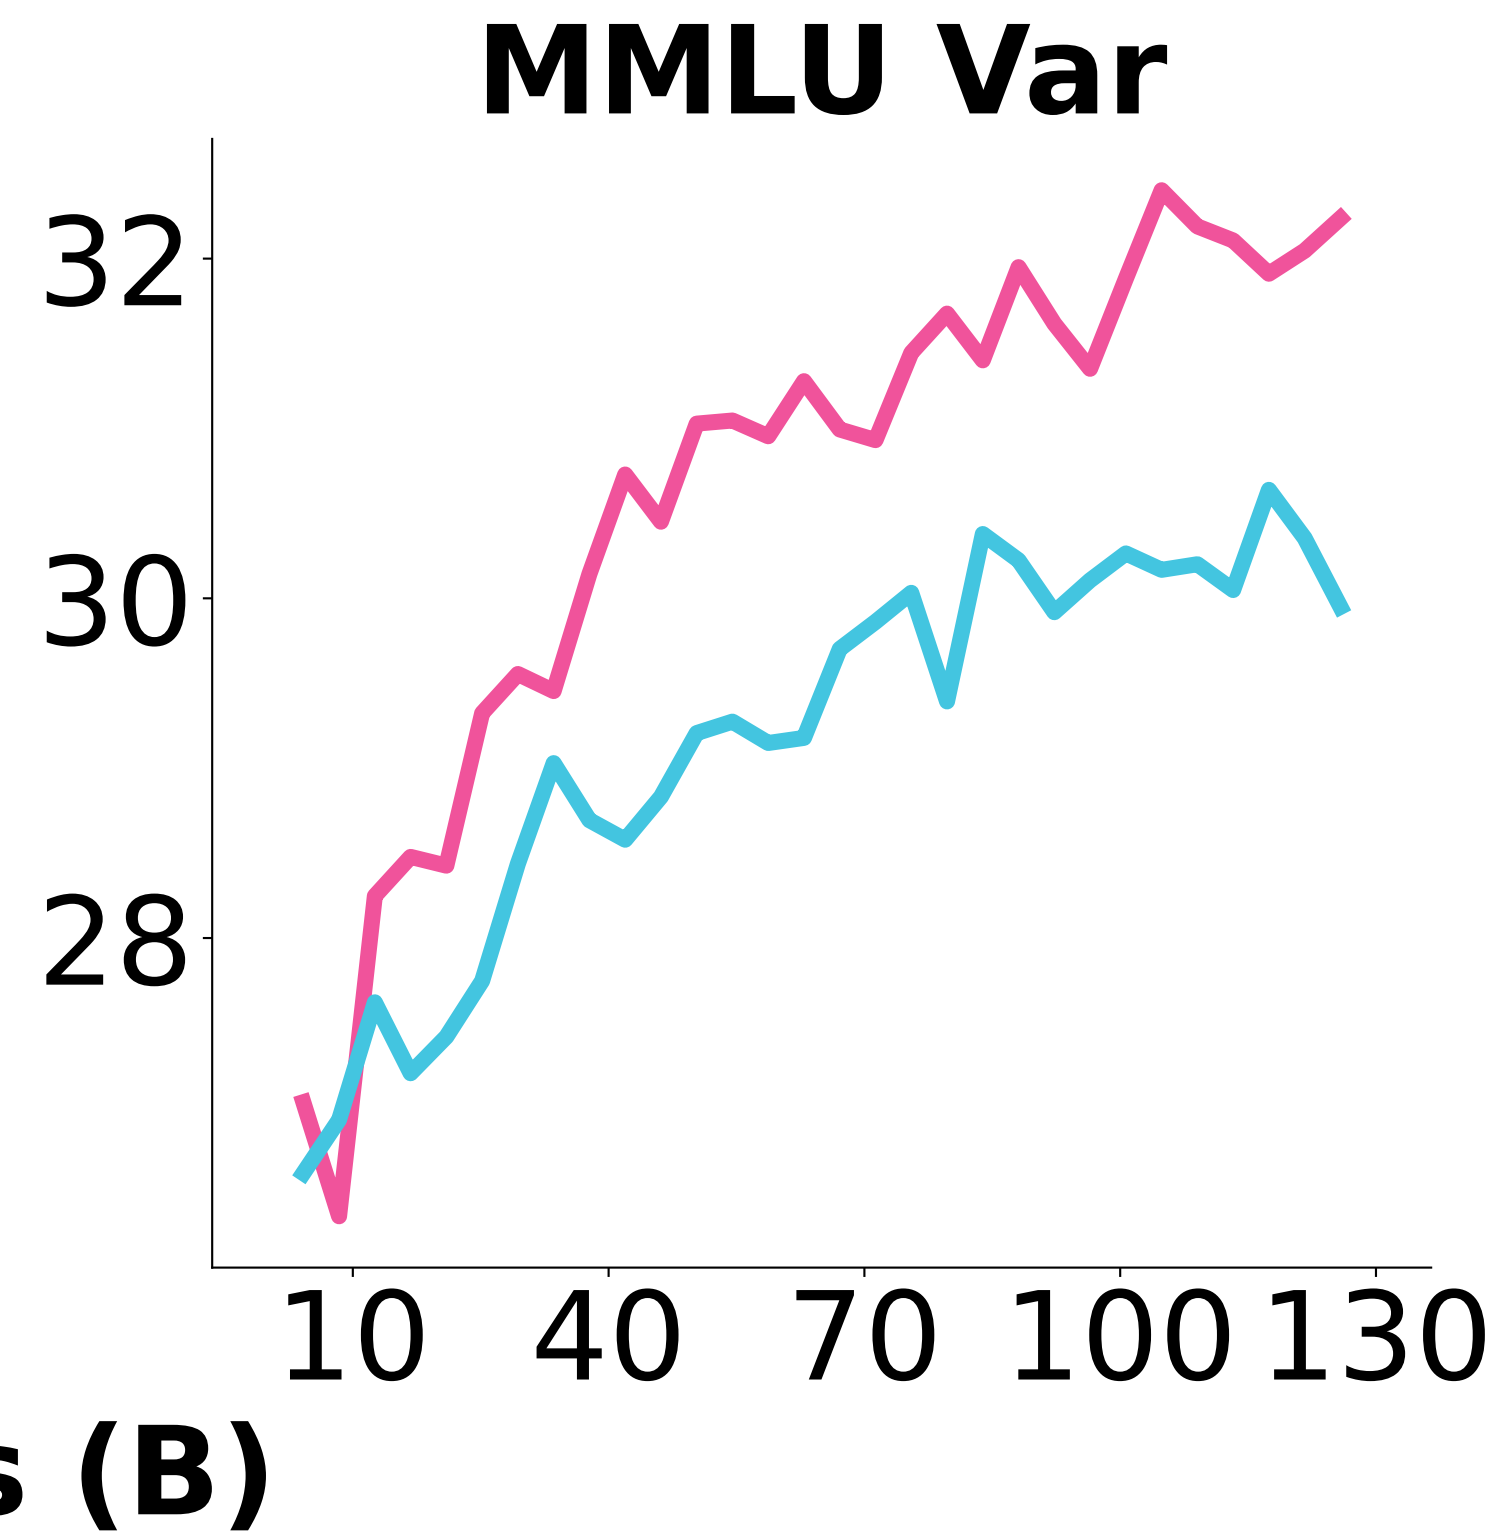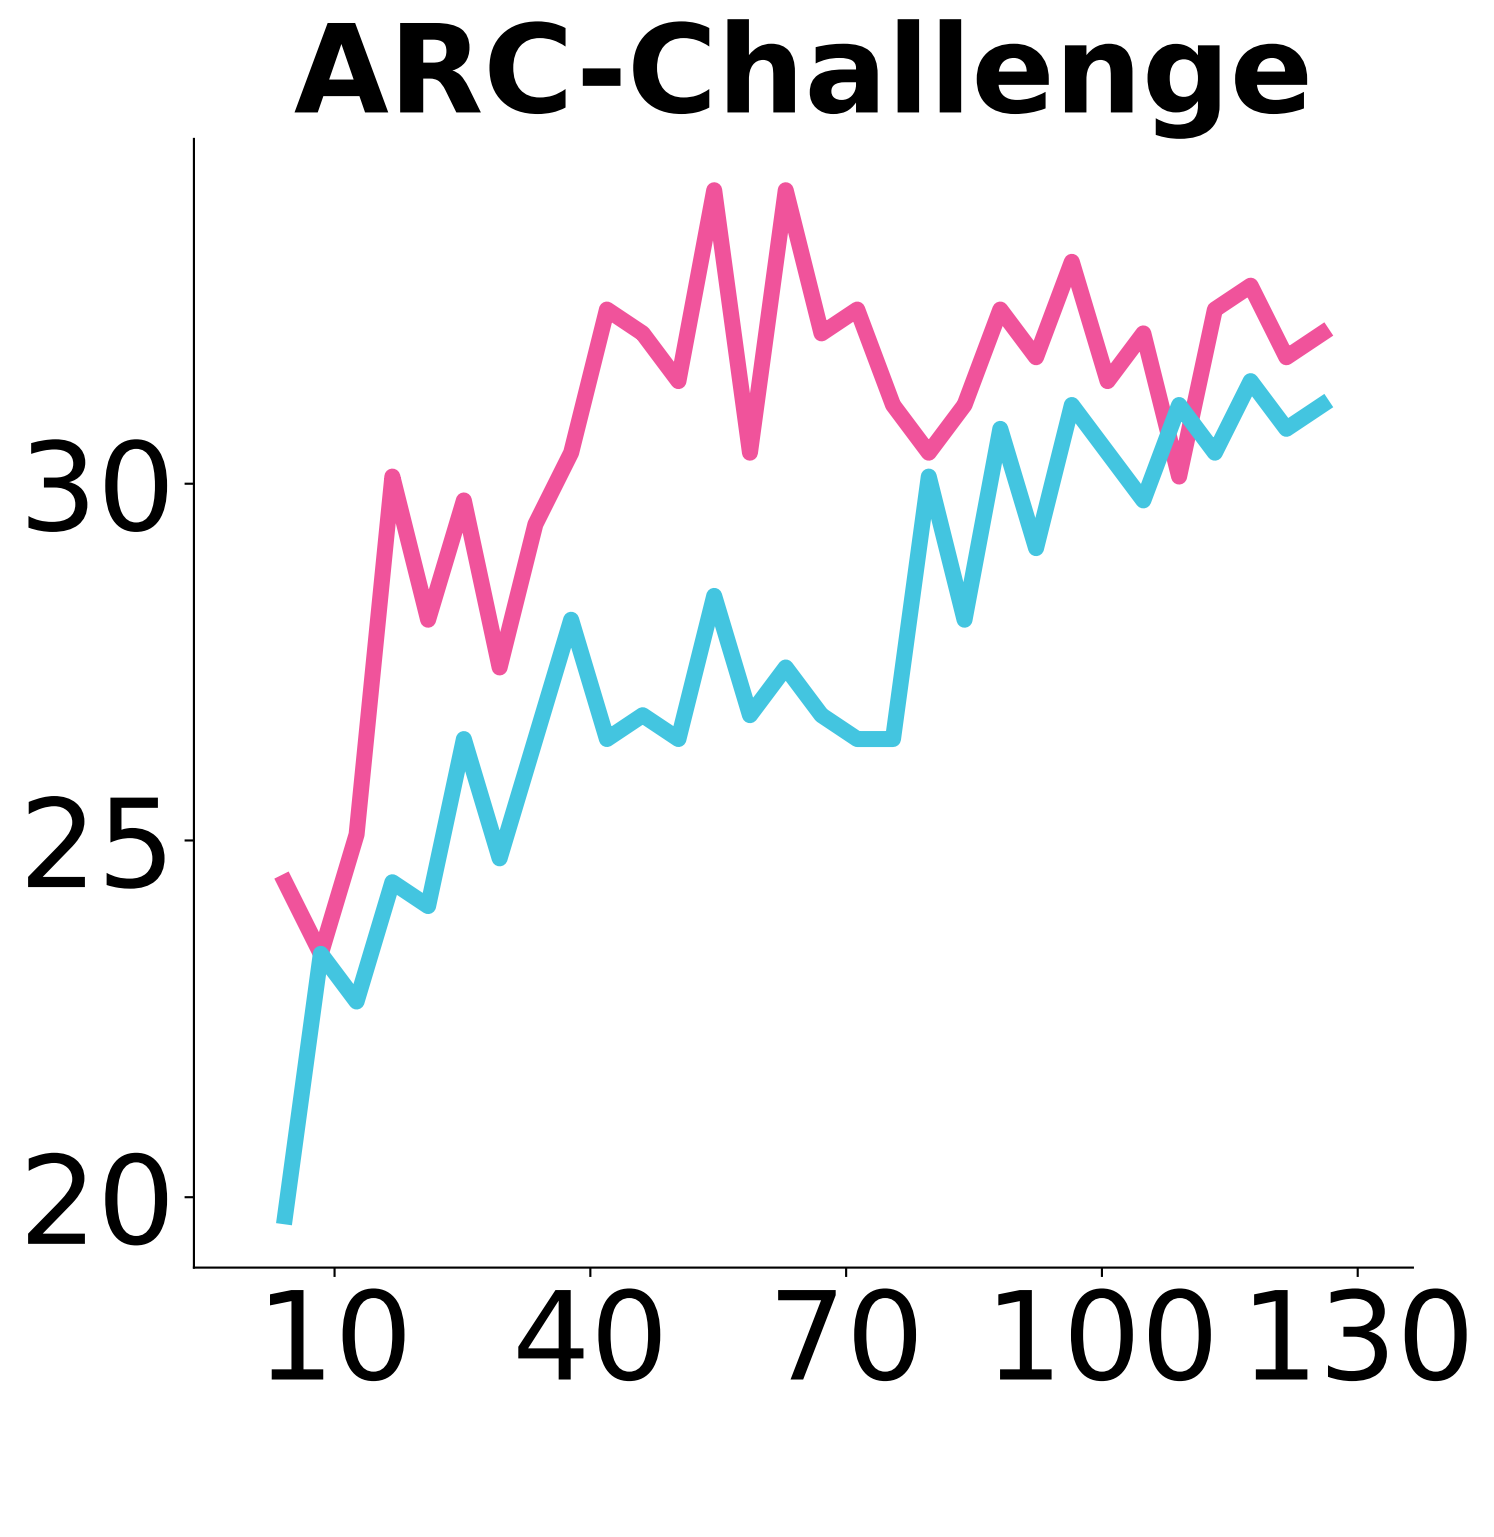

Supplement: supplementary_material [file dataset.pdf › RoMA_Code/visuals/figures/dataset.pdf]

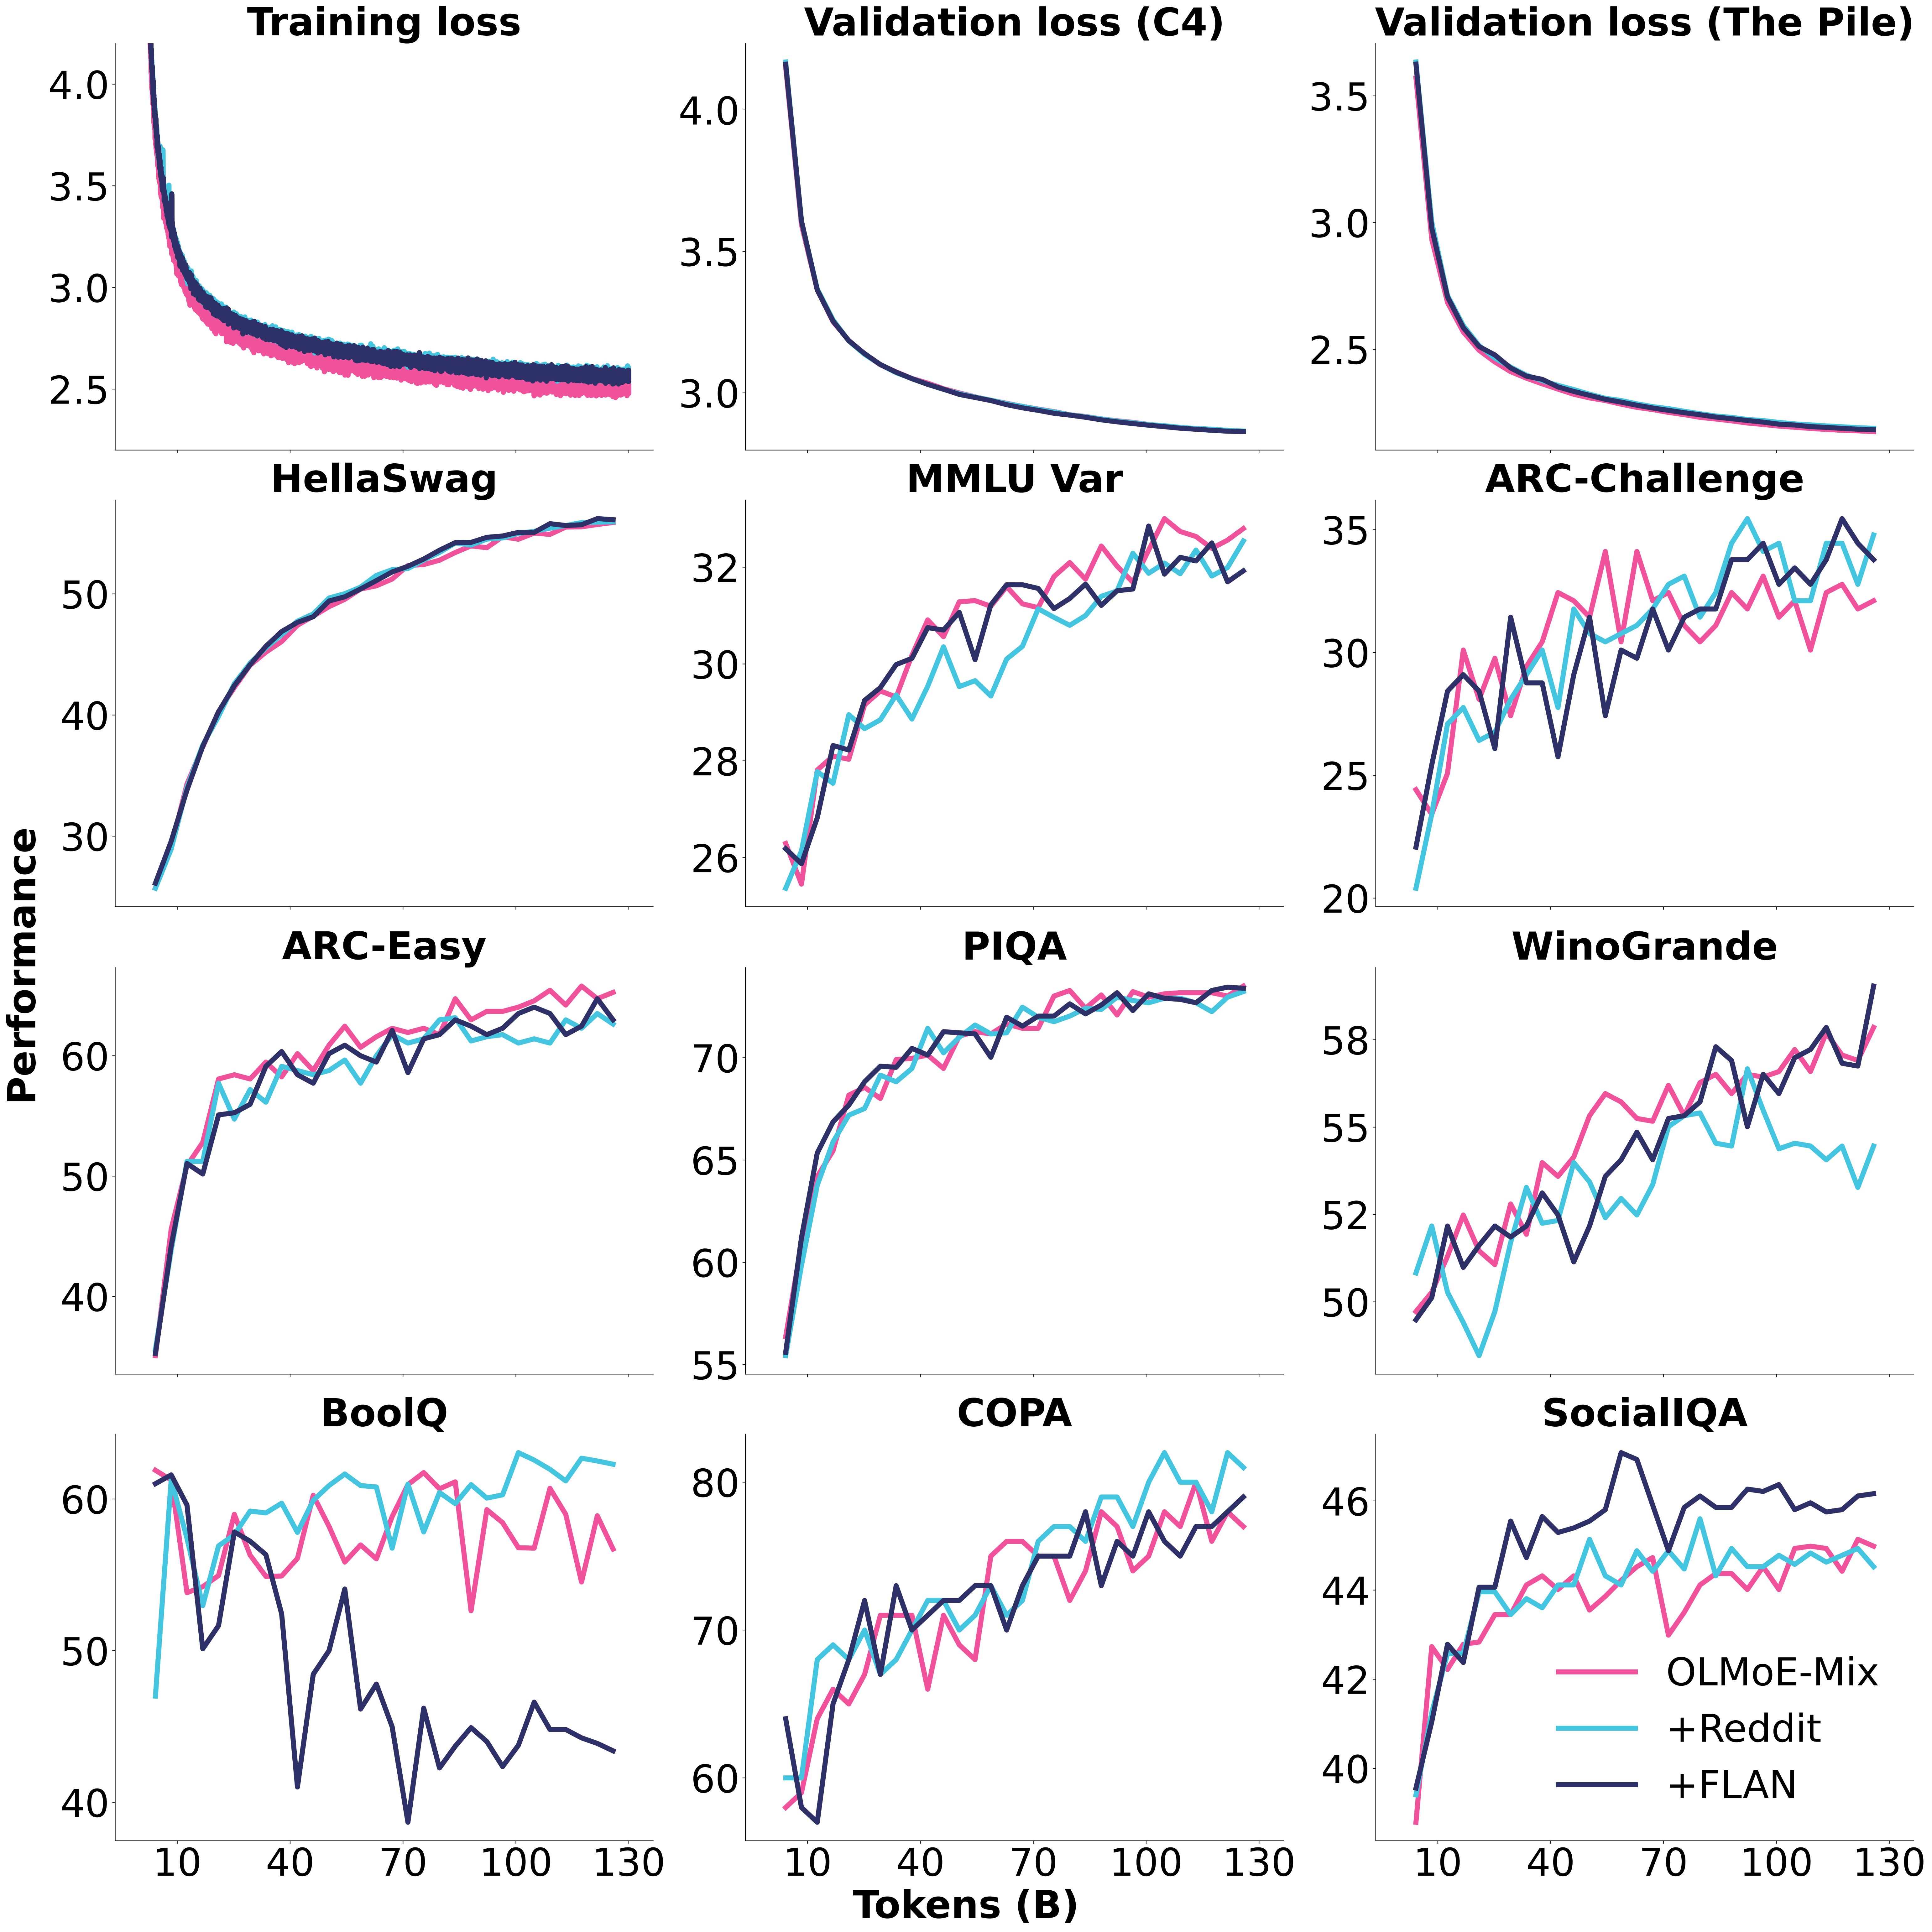

Supplement: supplementary_material [file datasetredditflan.pdf › RoMA_Code/visuals/figures/datasetredditflan.pdf]

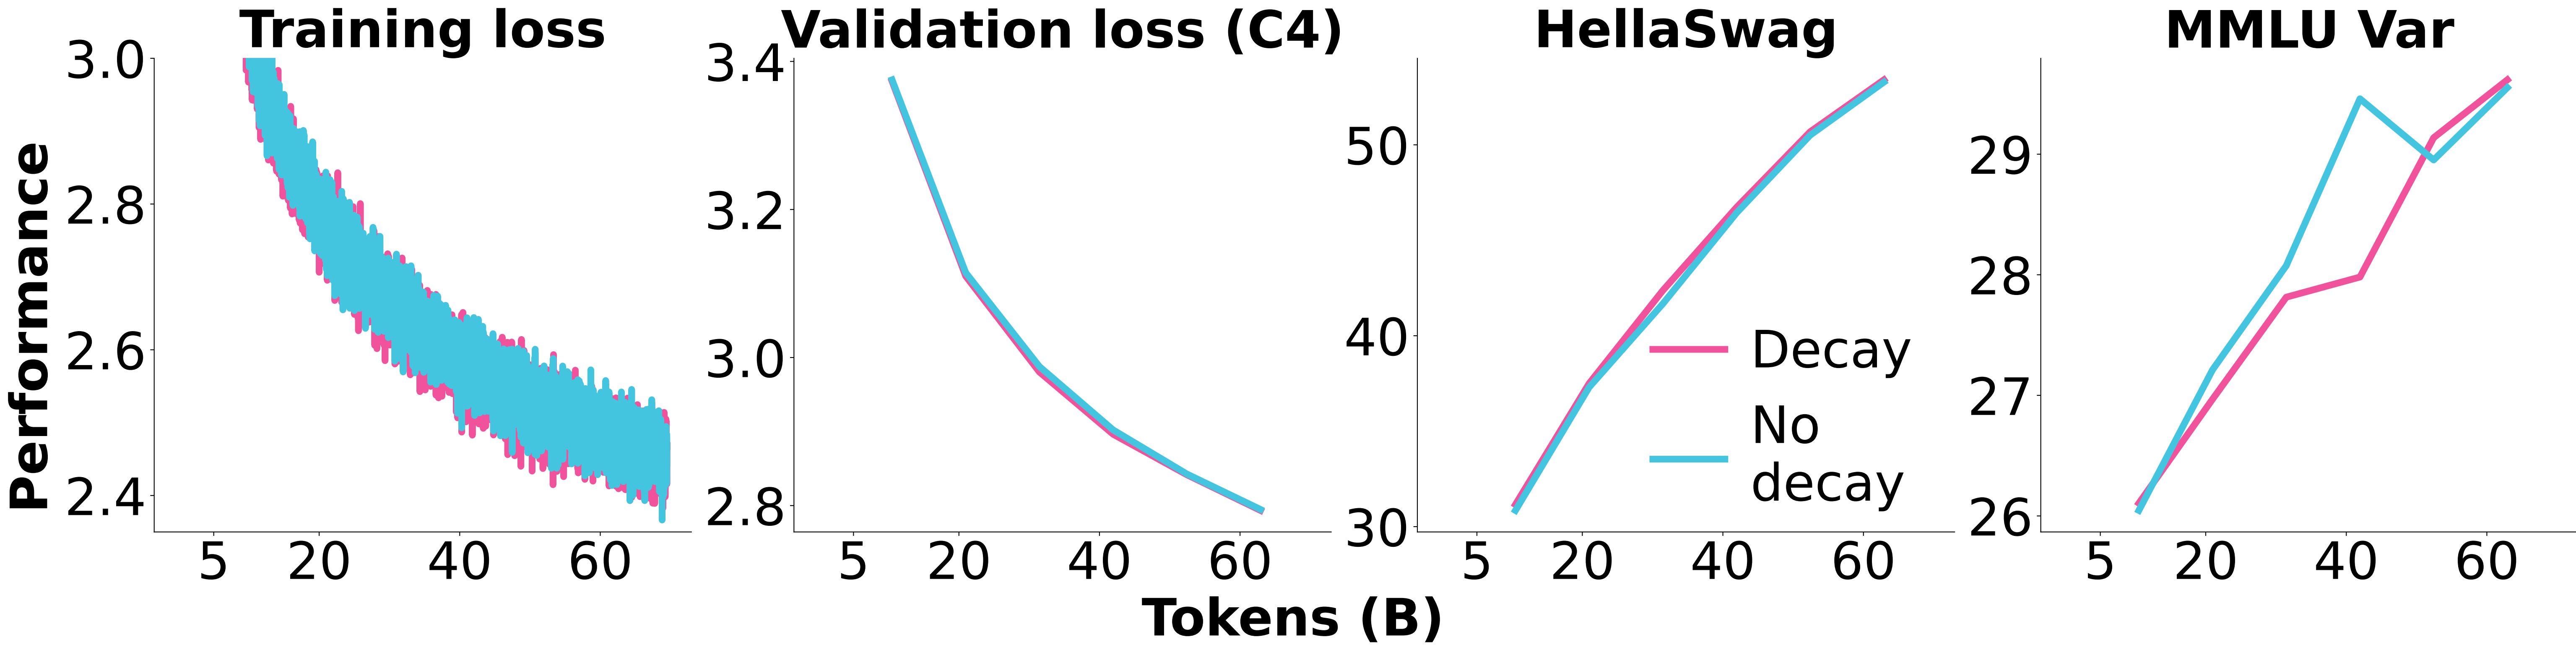

Supplement: supplementary_material [file embdecay.pdf › RoMA_Code/visuals/figures/embdecay.pdf]

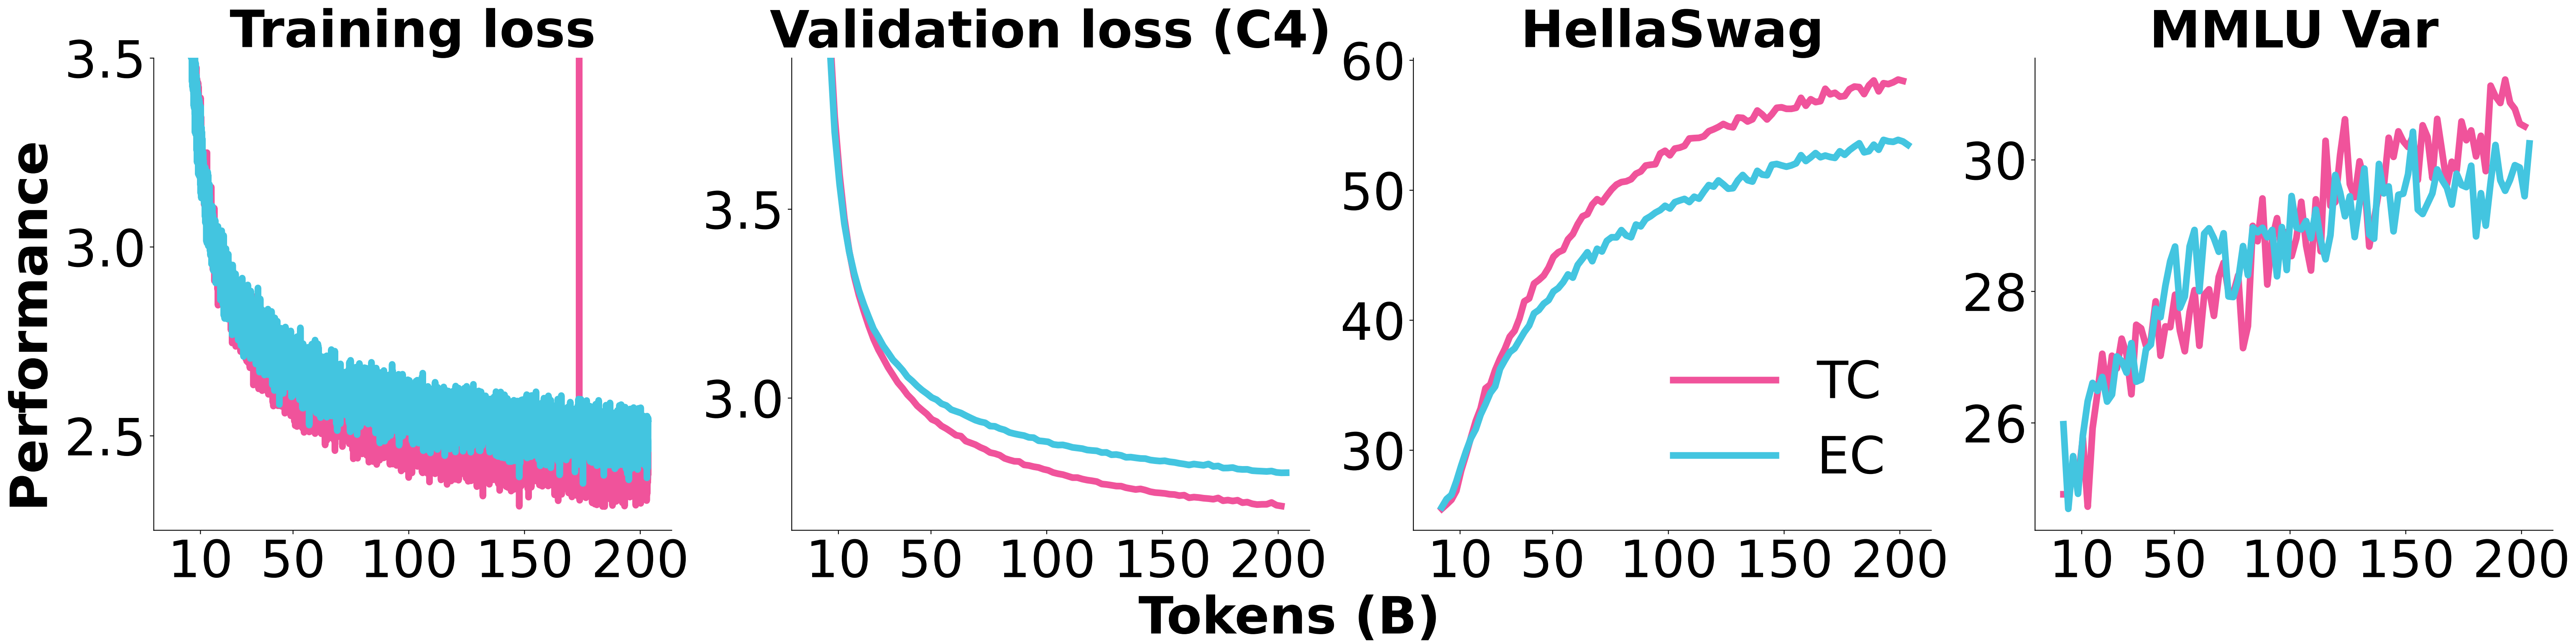

Supplement: supplementary_material [file expertchoice.pdf › RoMA_Code/visuals/figures/expertchoice.pdf]

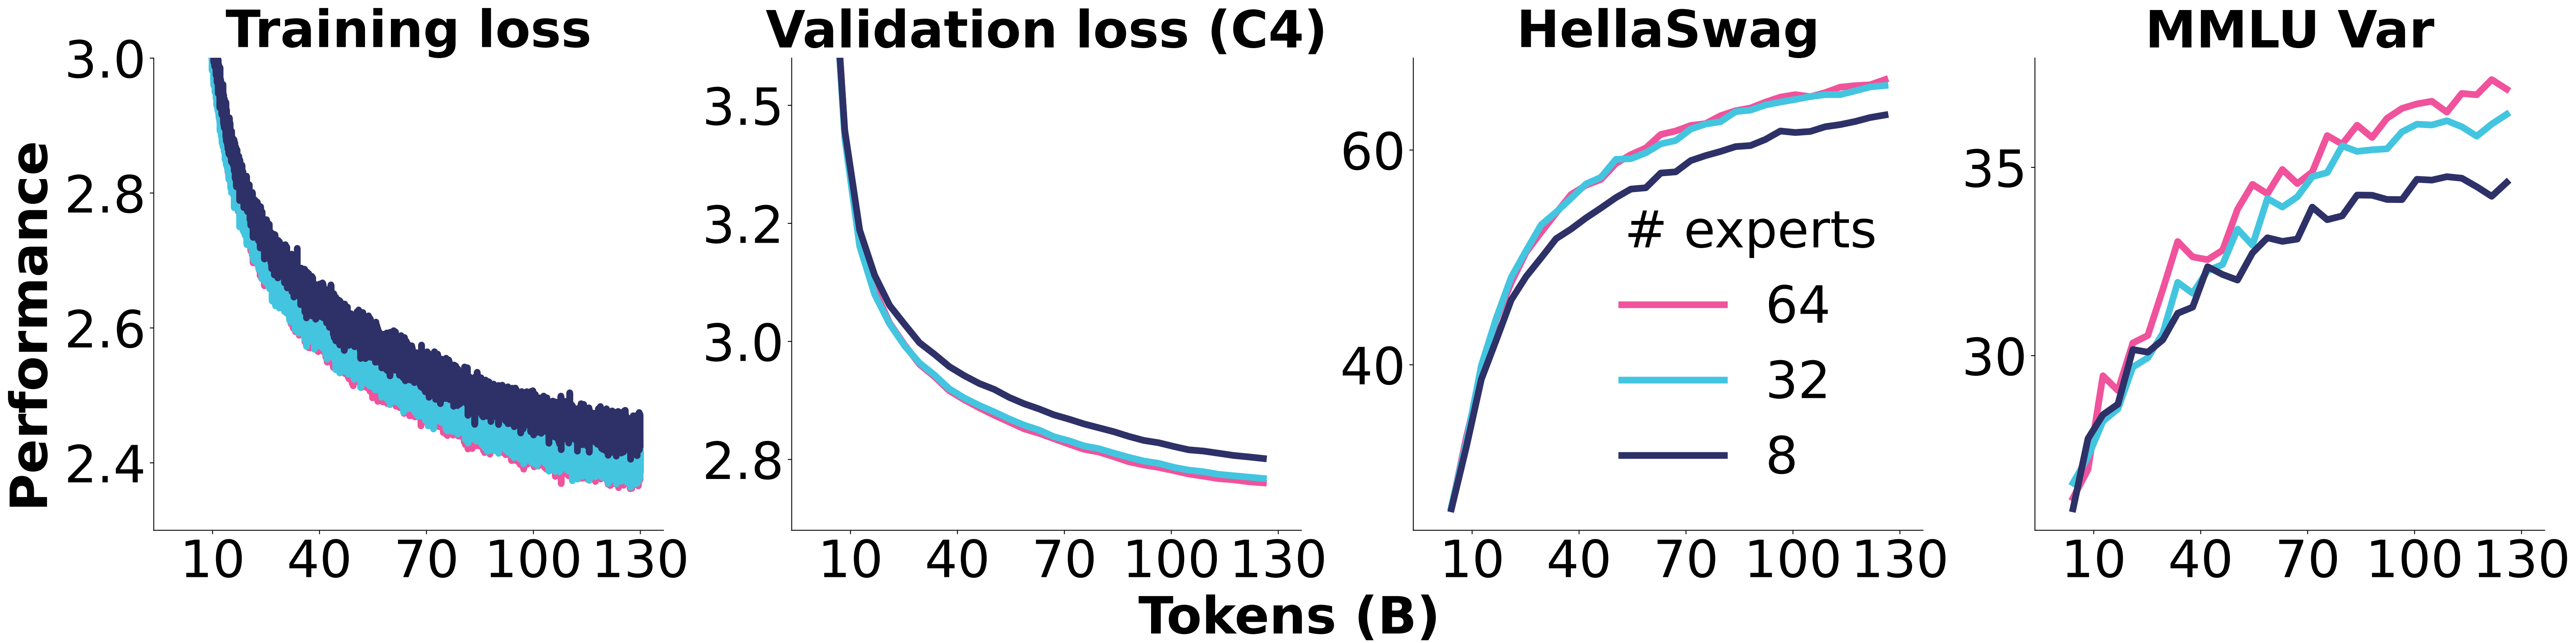

Supplement: supplementary_material [file granularity.pdf › RoMA_Code/visuals/figures/granularity.pdf]

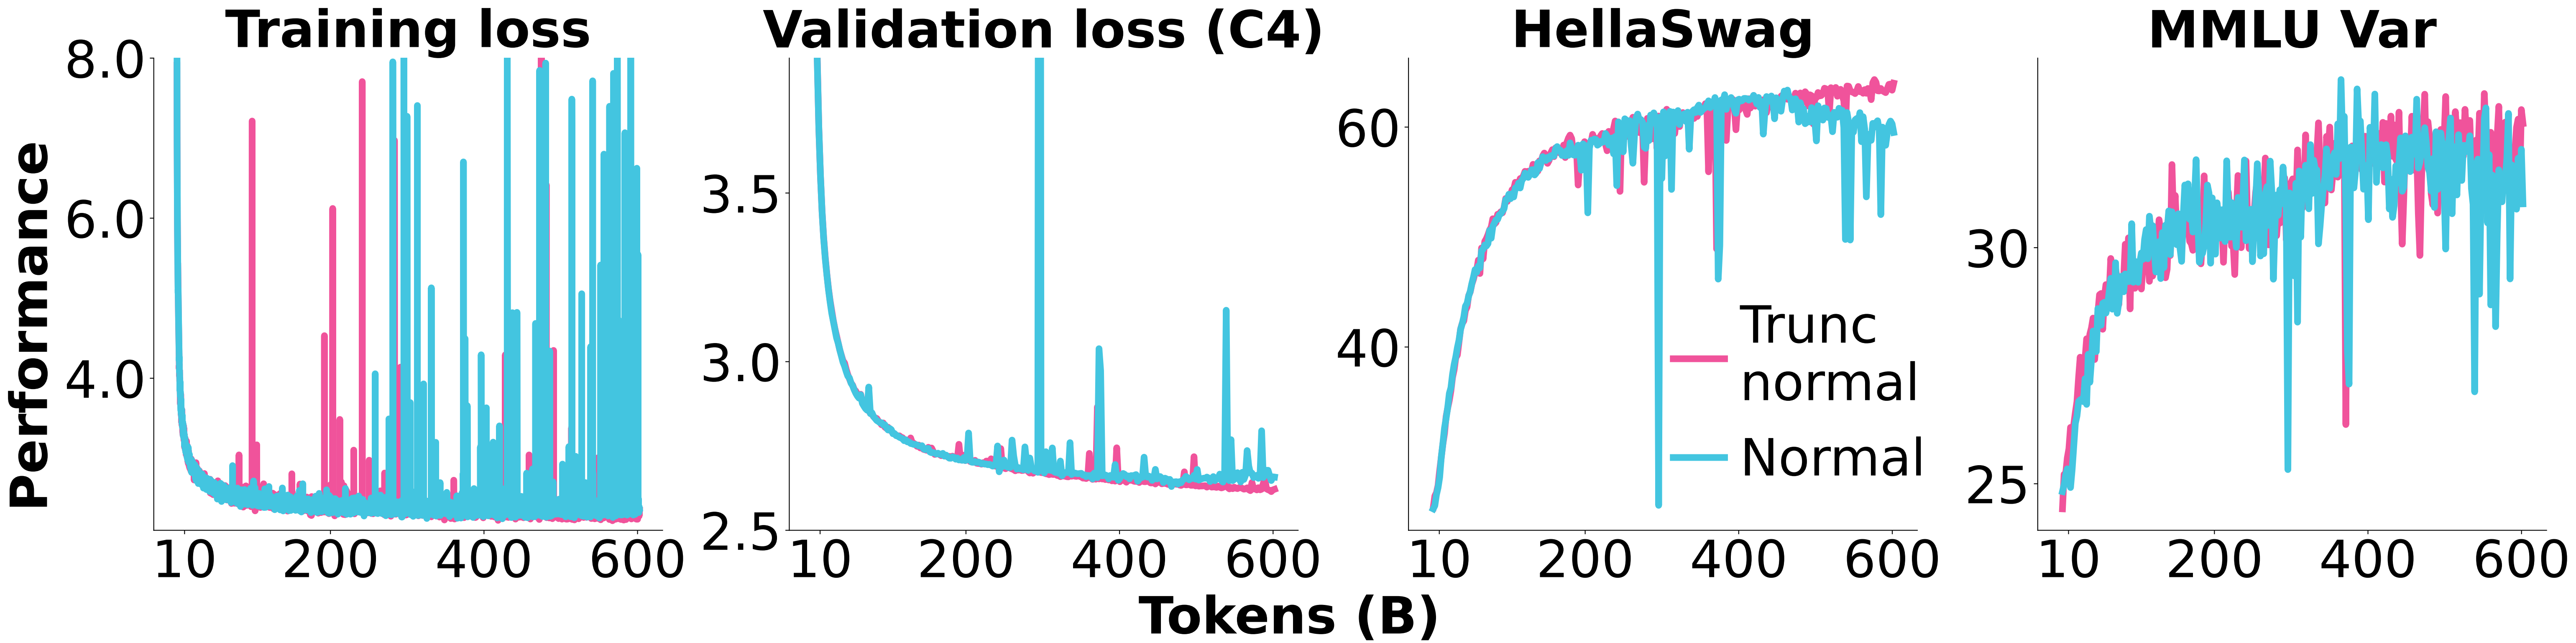

Supplement: supplementary_material [file init.pdf › RoMA_Code/visuals/figures/init.pdf]

# Layer 0

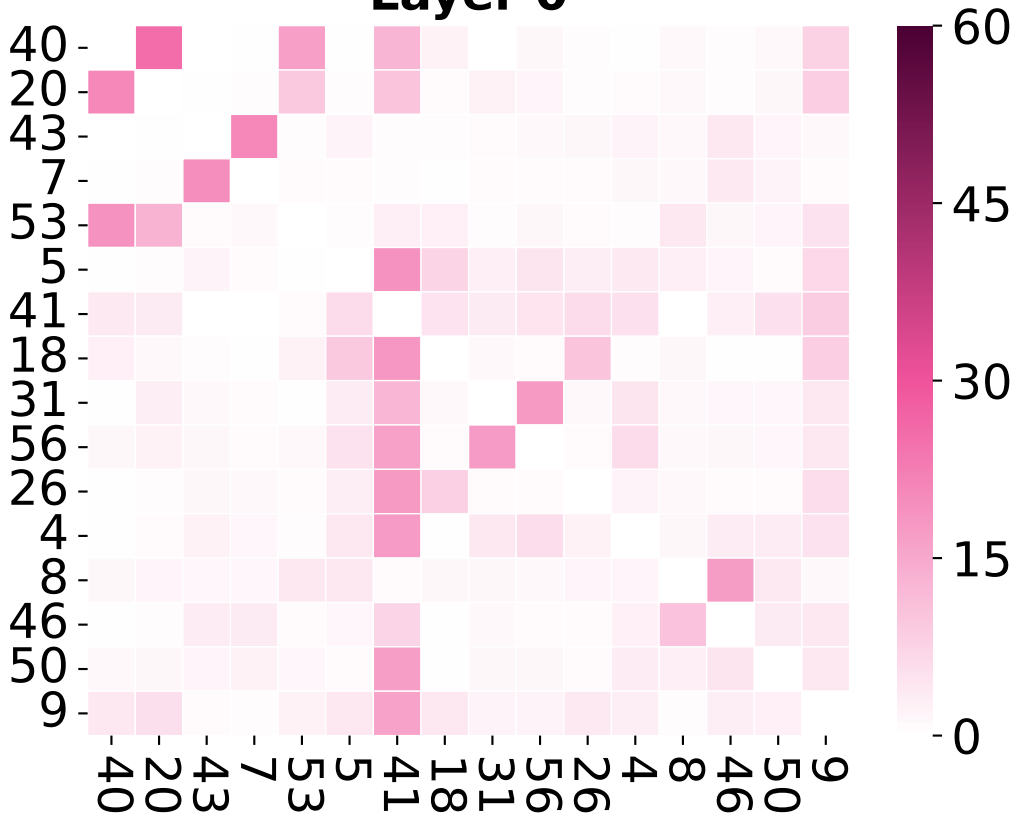

Supplement: supplementary_material [file layer_0_heatmap.pdf › RoMA_Code/visuals/figures/layer_0_heatmap.pdf]

# Layer 15

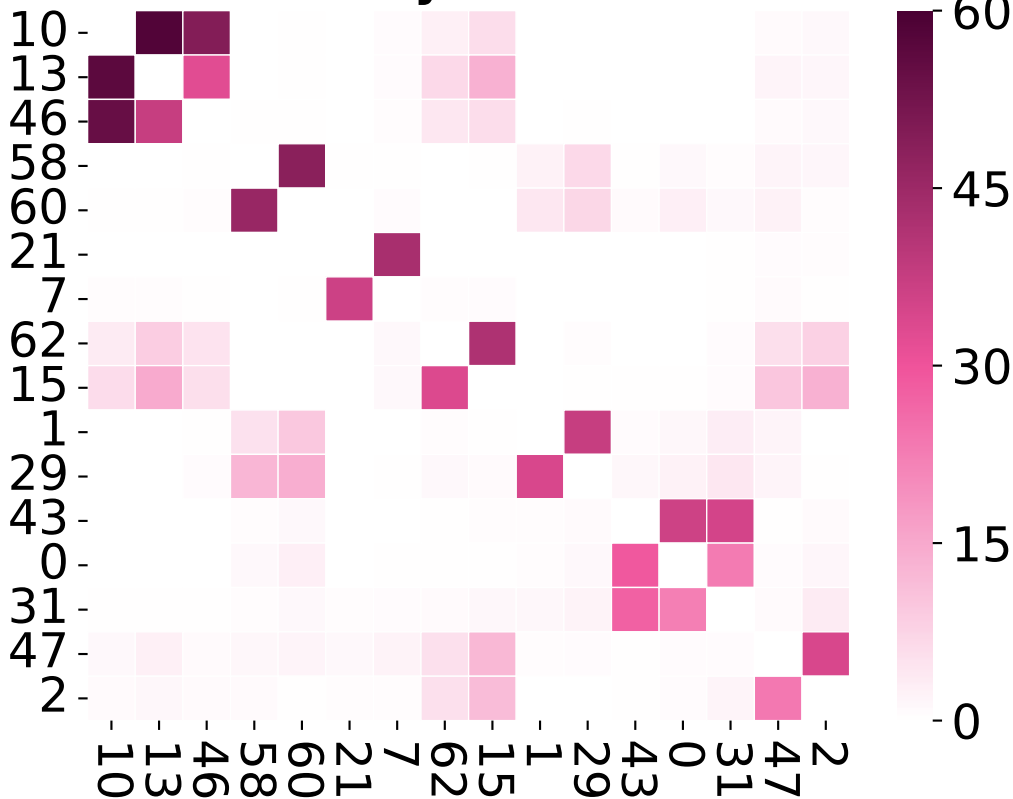

Supplement: supplementary_material [file layer_15_heatmap.pdf › RoMA_Code/visuals/figures/layer_15_heatmap.pdf]

## Layer 7

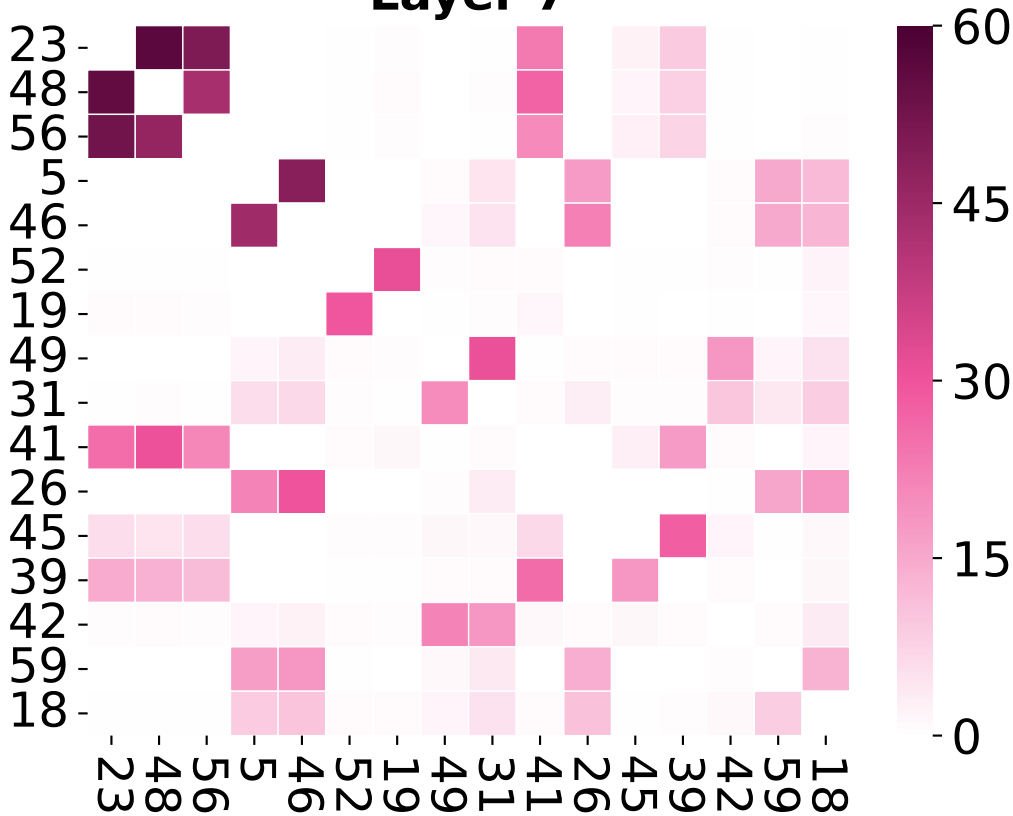

Supplement: supplementary_material [file layer_7_heatmap.pdf › RoMA_Code/visuals/figures/layer_7_heatmap.pdf]

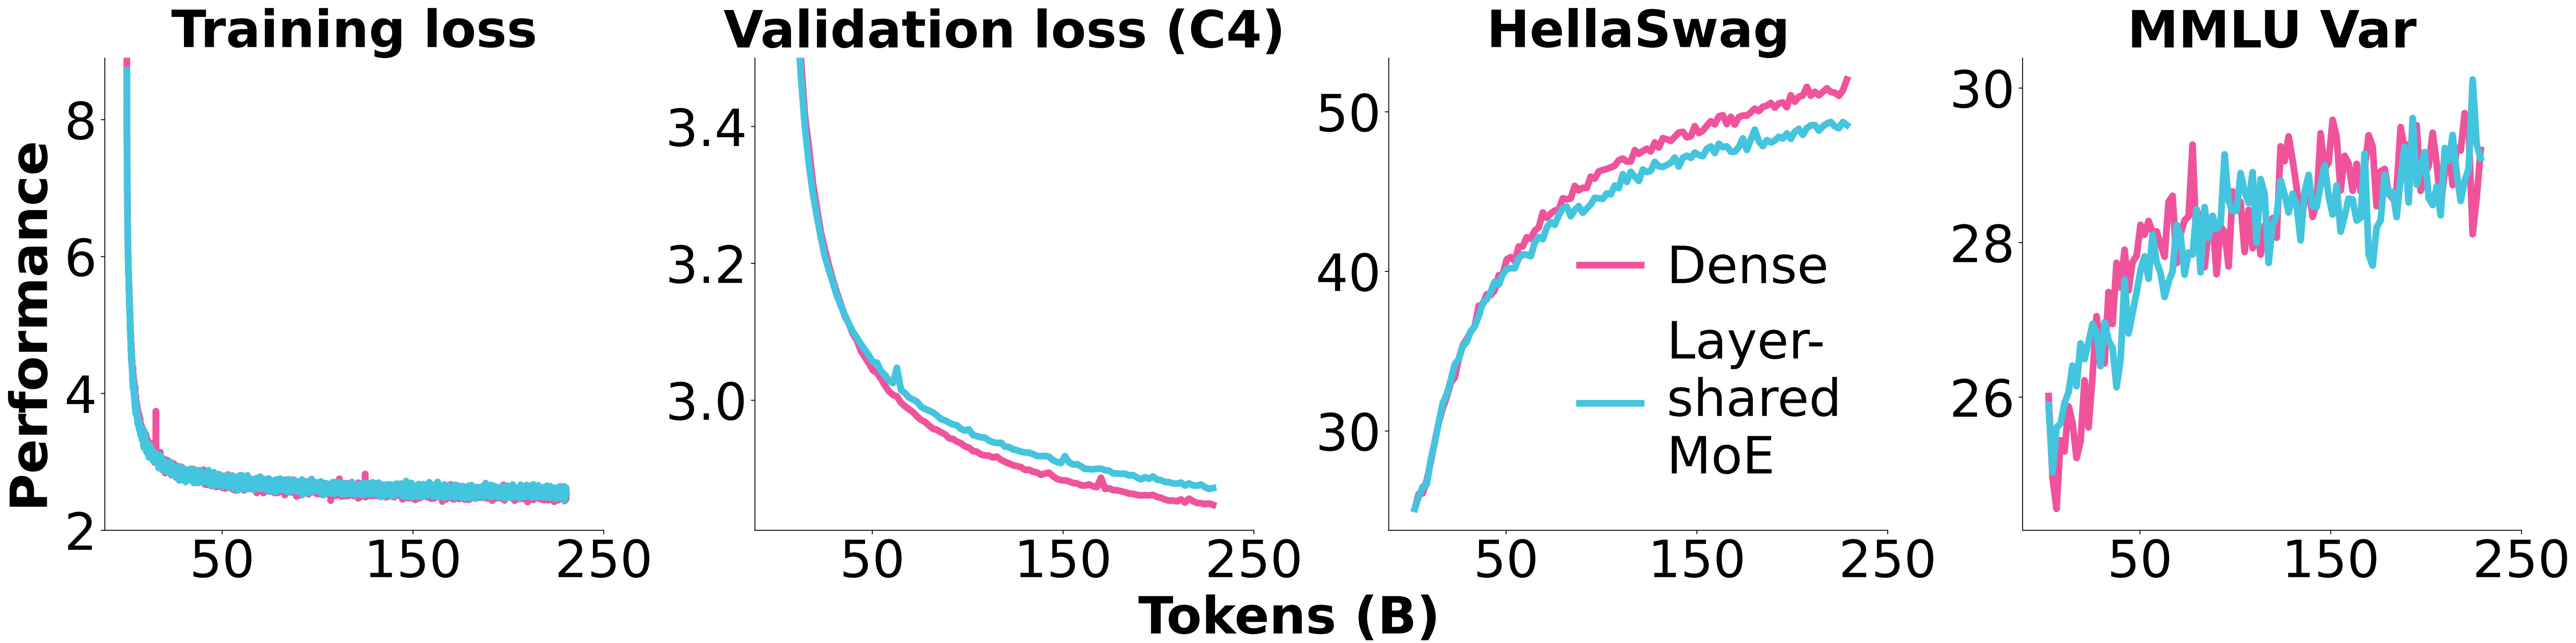

Supplement: supplementary_material [file layersharing.pdf › RoMA_Code/visuals/figures/layersharing.pdf]

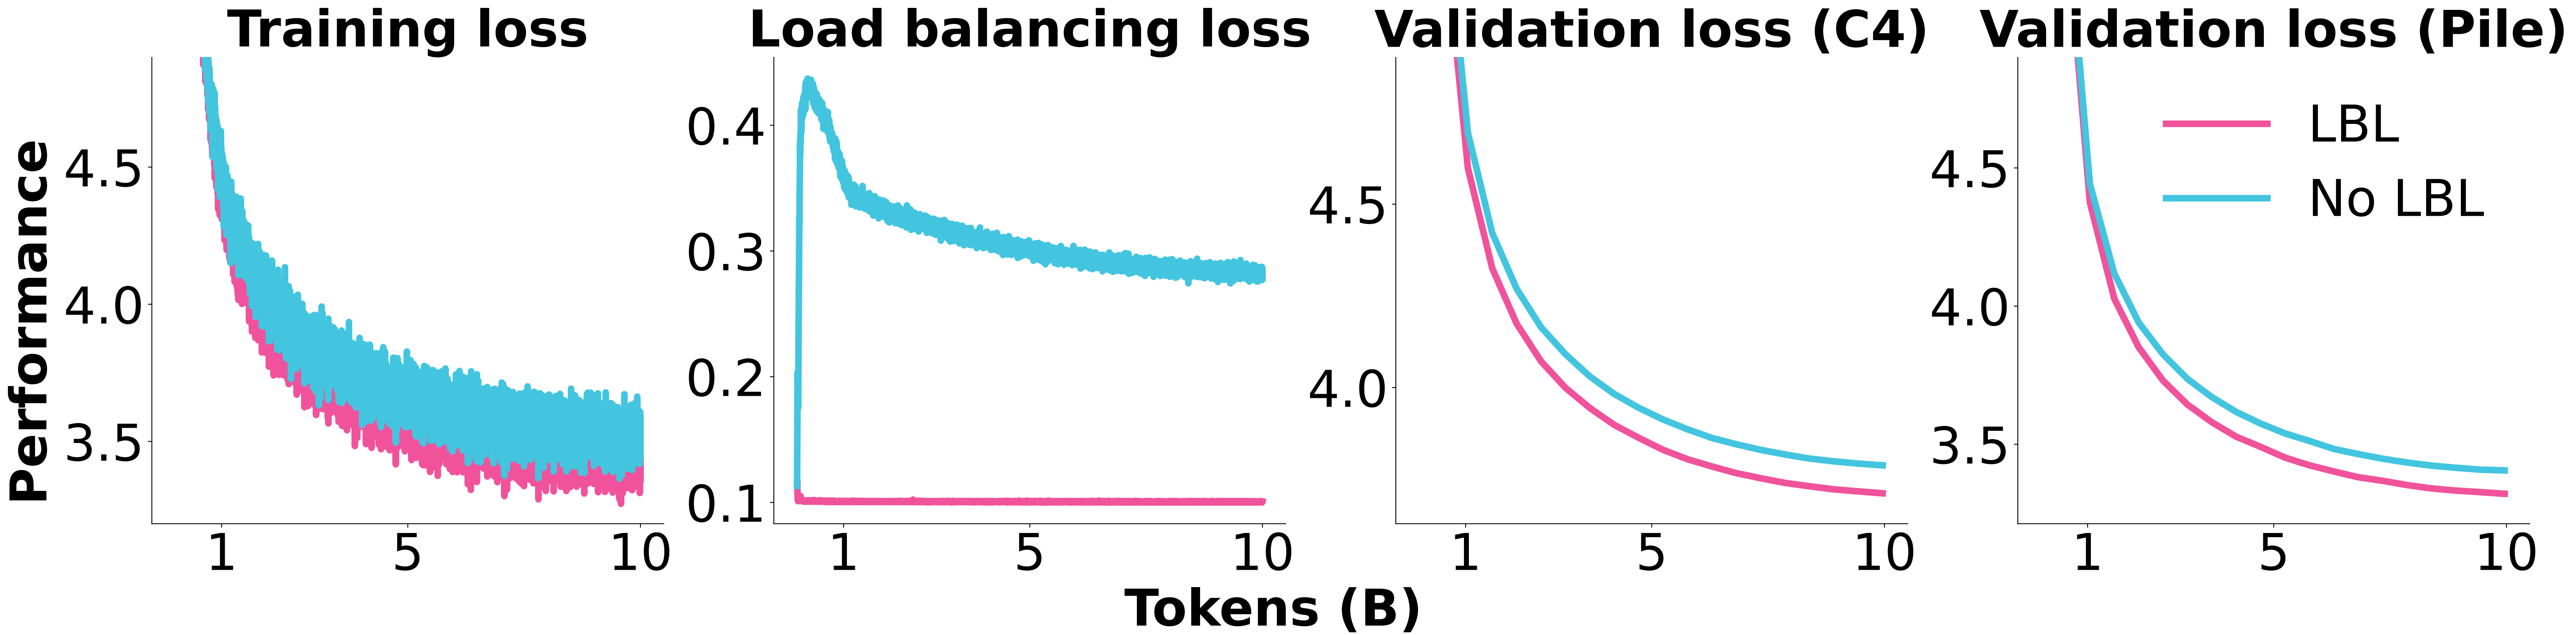

Supplement: supplementary_material [file lbl.pdf › RoMA_Code/visuals/figures/lbl.pdf]

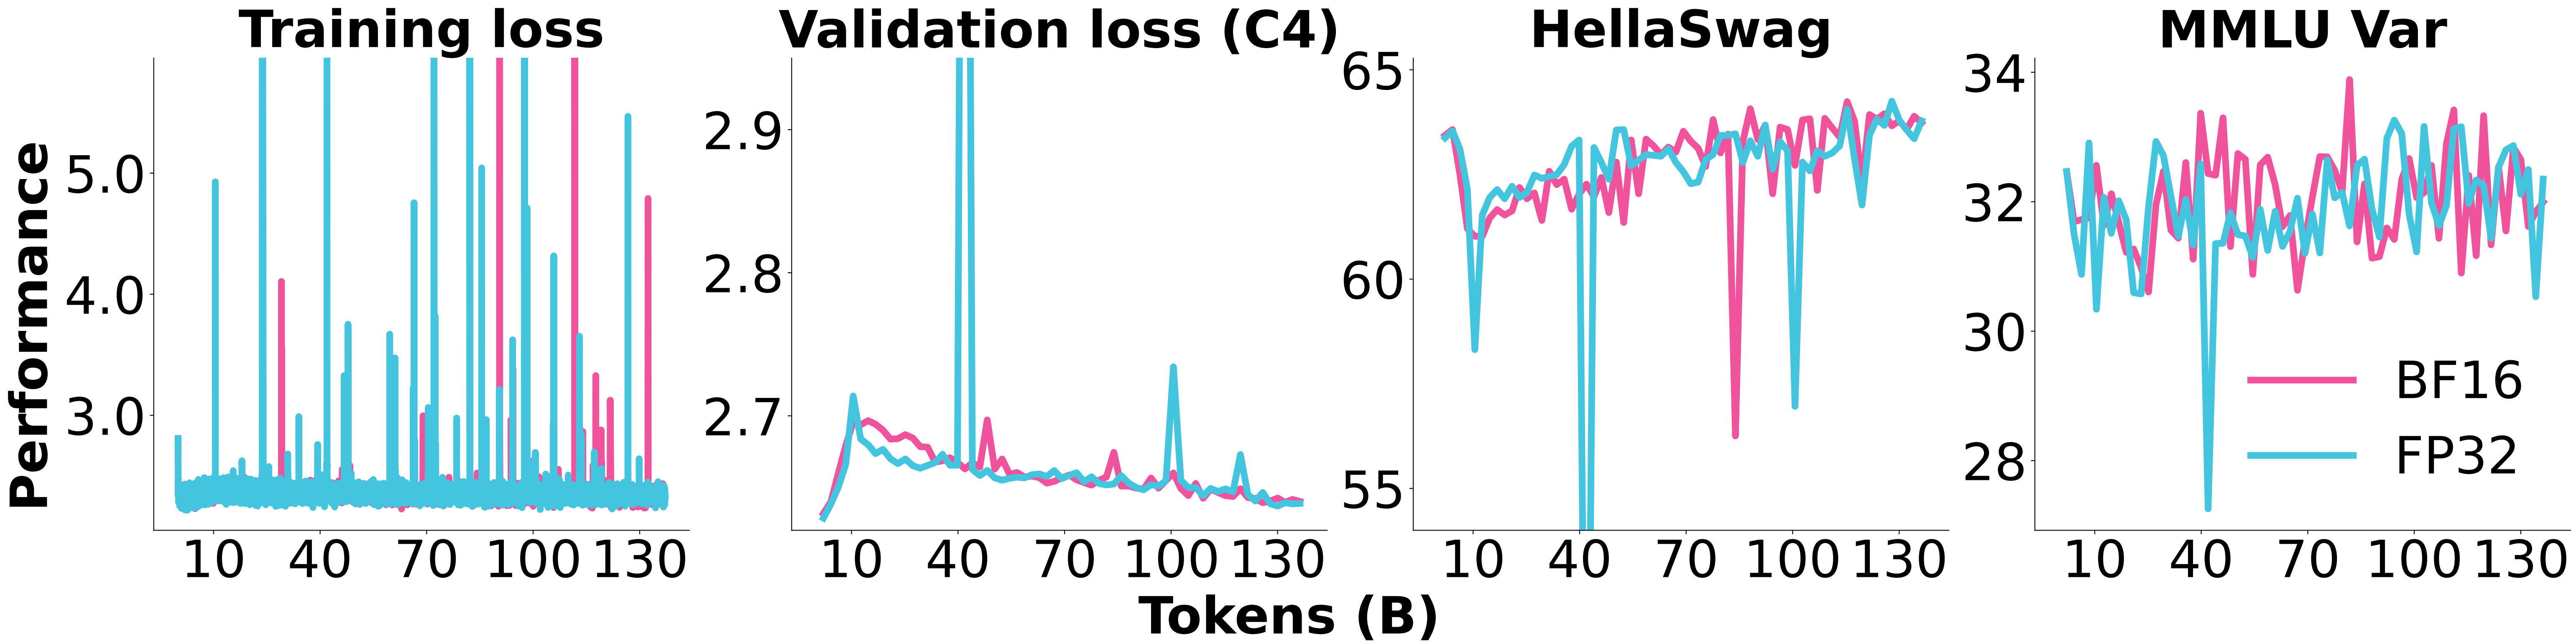

Supplement: supplementary_material [file lblprecision.pdf › RoMA_Code/visuals/figures/lblprecision.pdf]

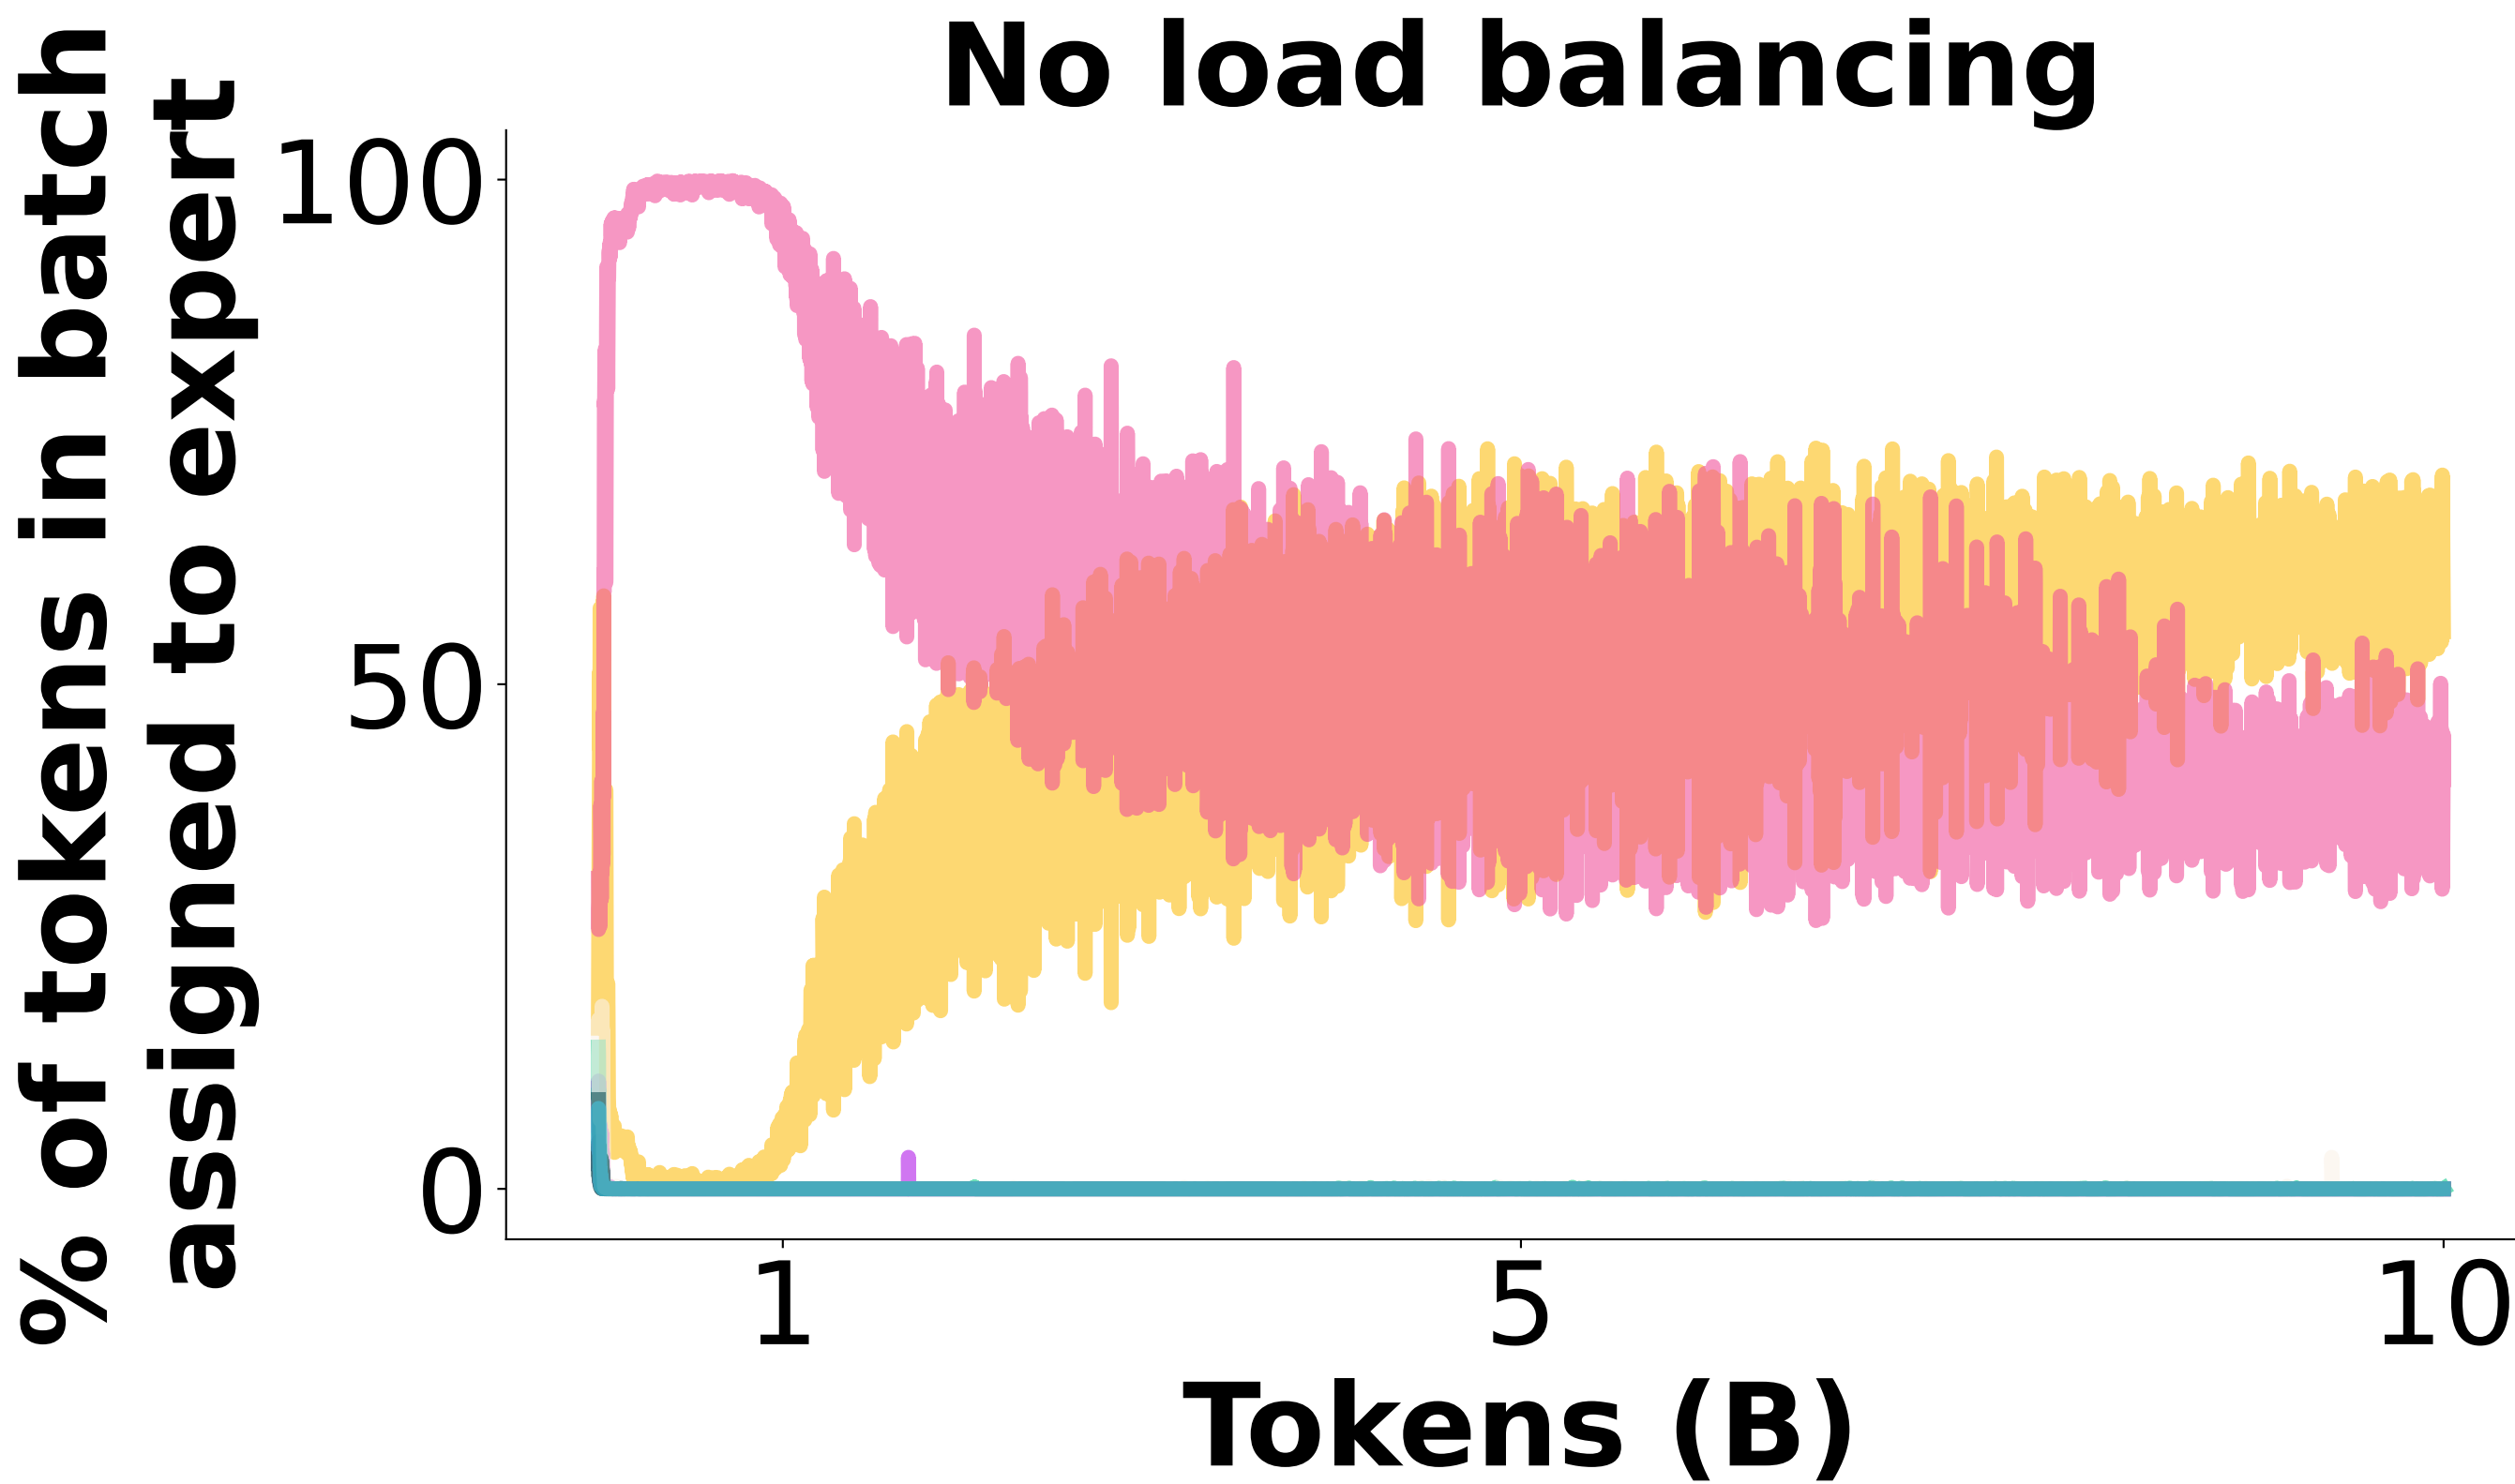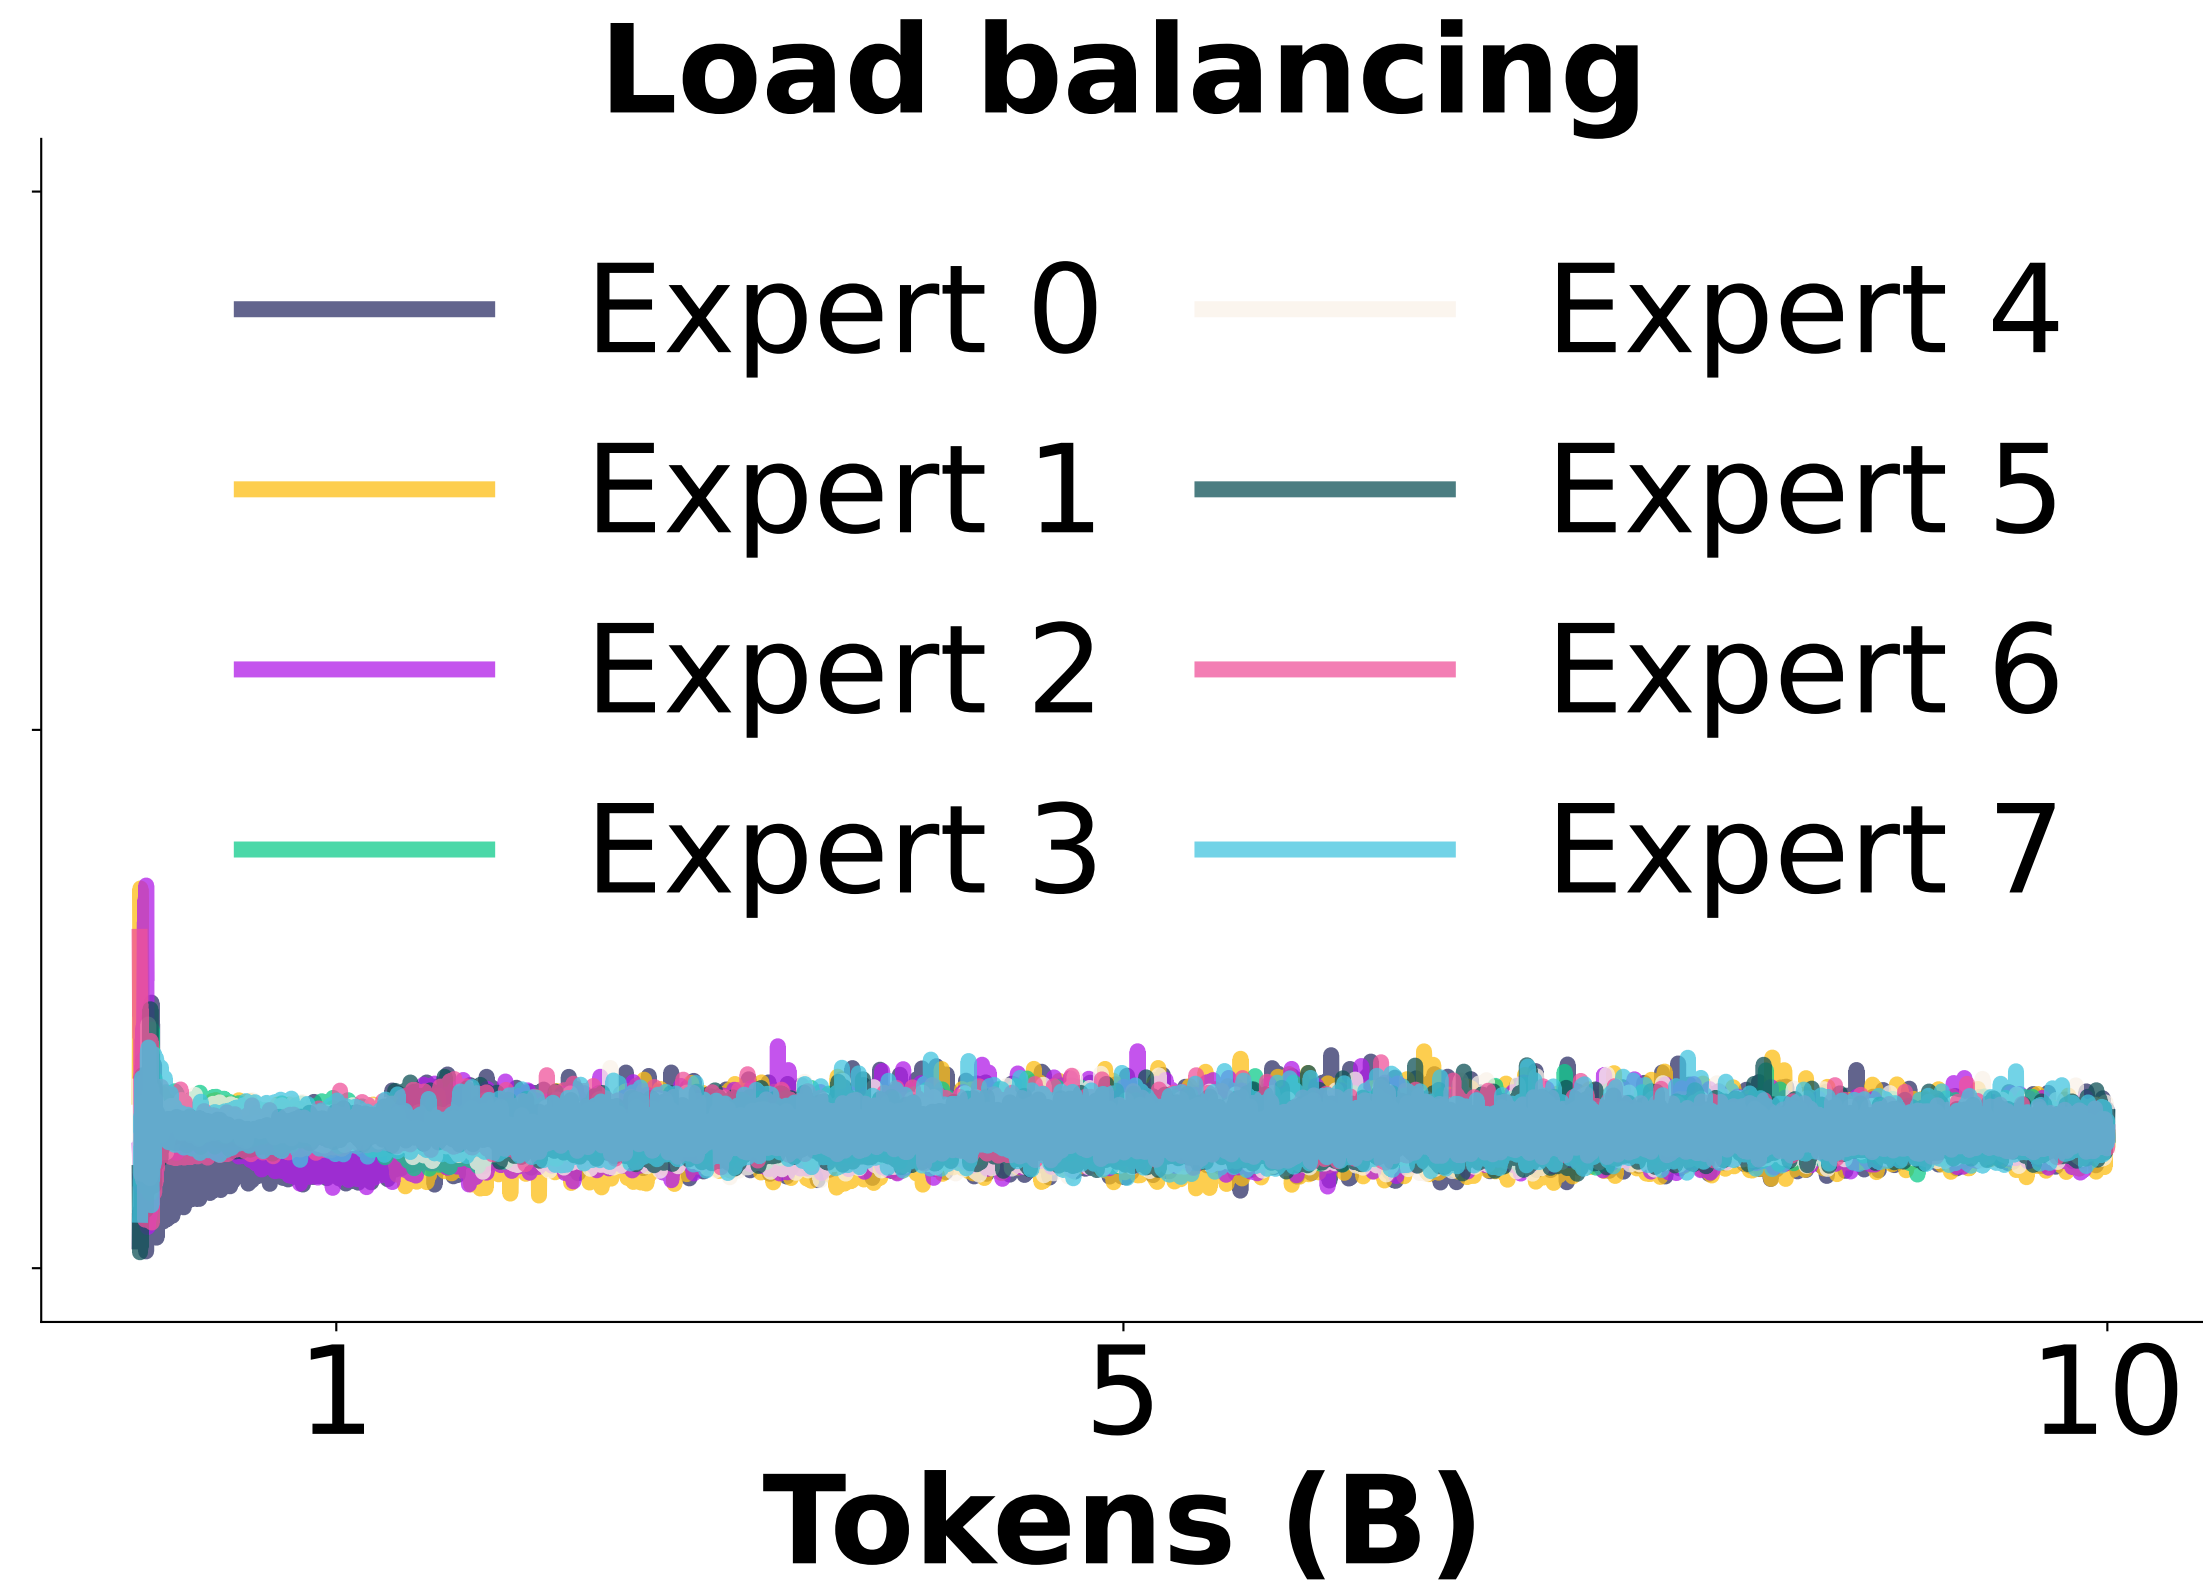

Supplement: supplementary_material [file lbltoks.pdf › RoMA_Code/visuals/figures/lbltoks.pdf]

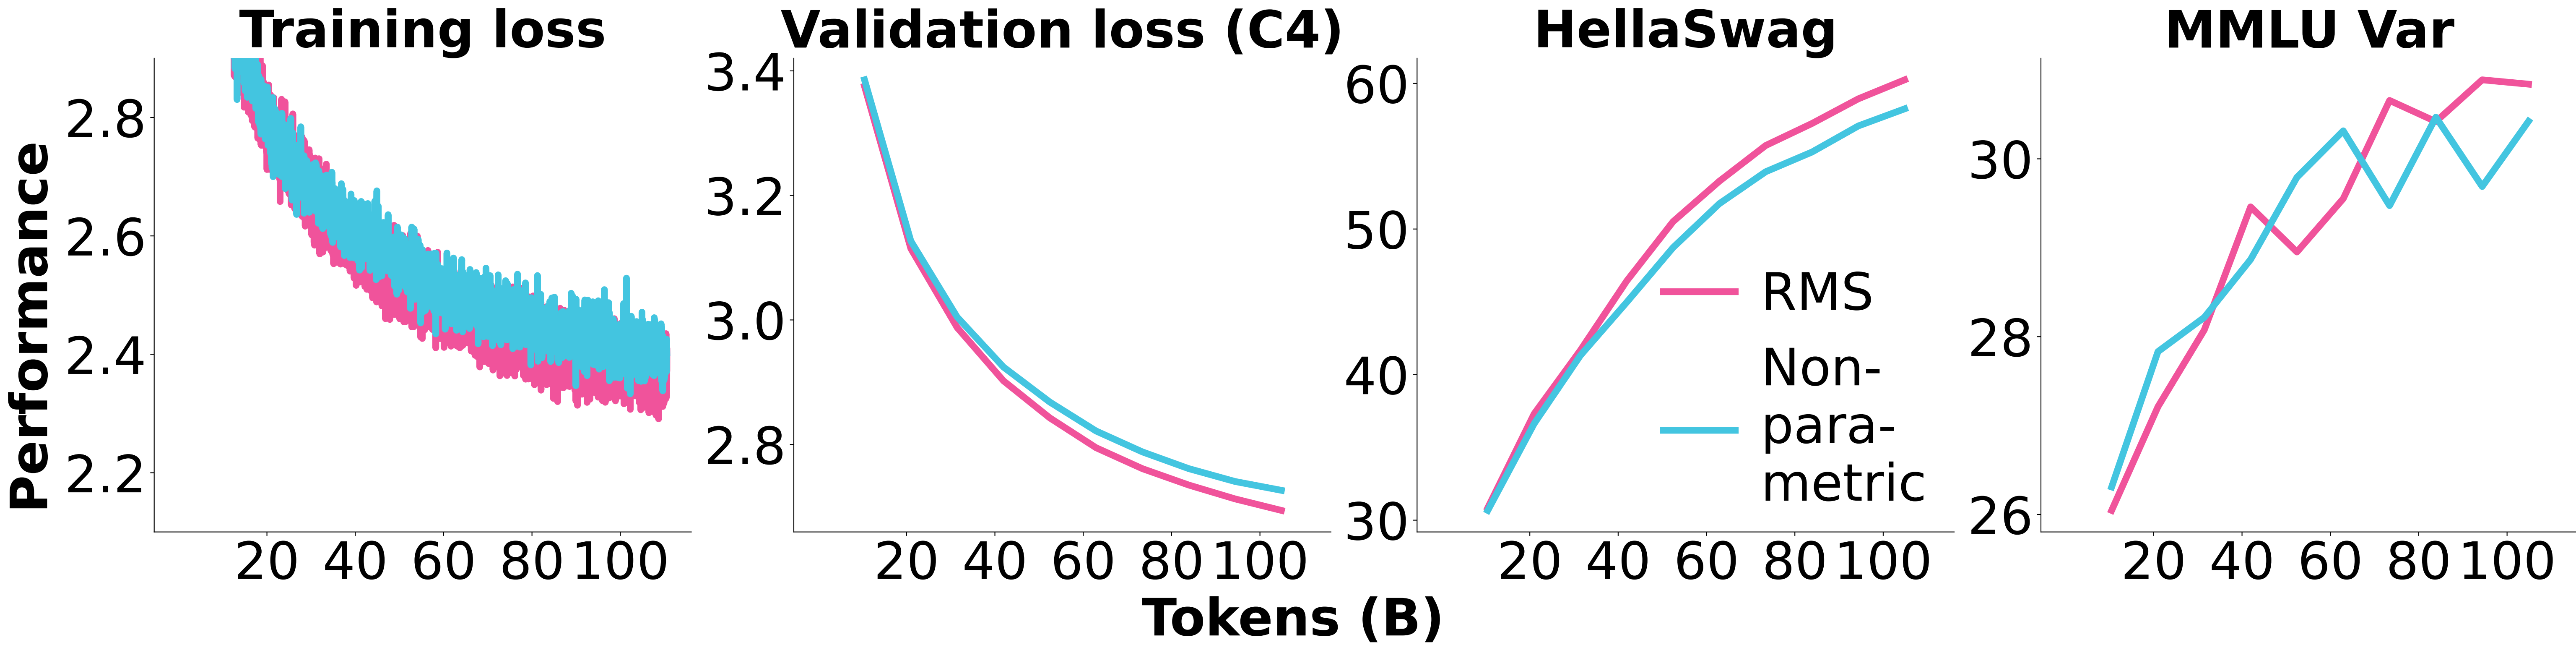

Supplement: supplementary_material [file ln.pdf › RoMA_Code/visuals/figures/ln.pdf]

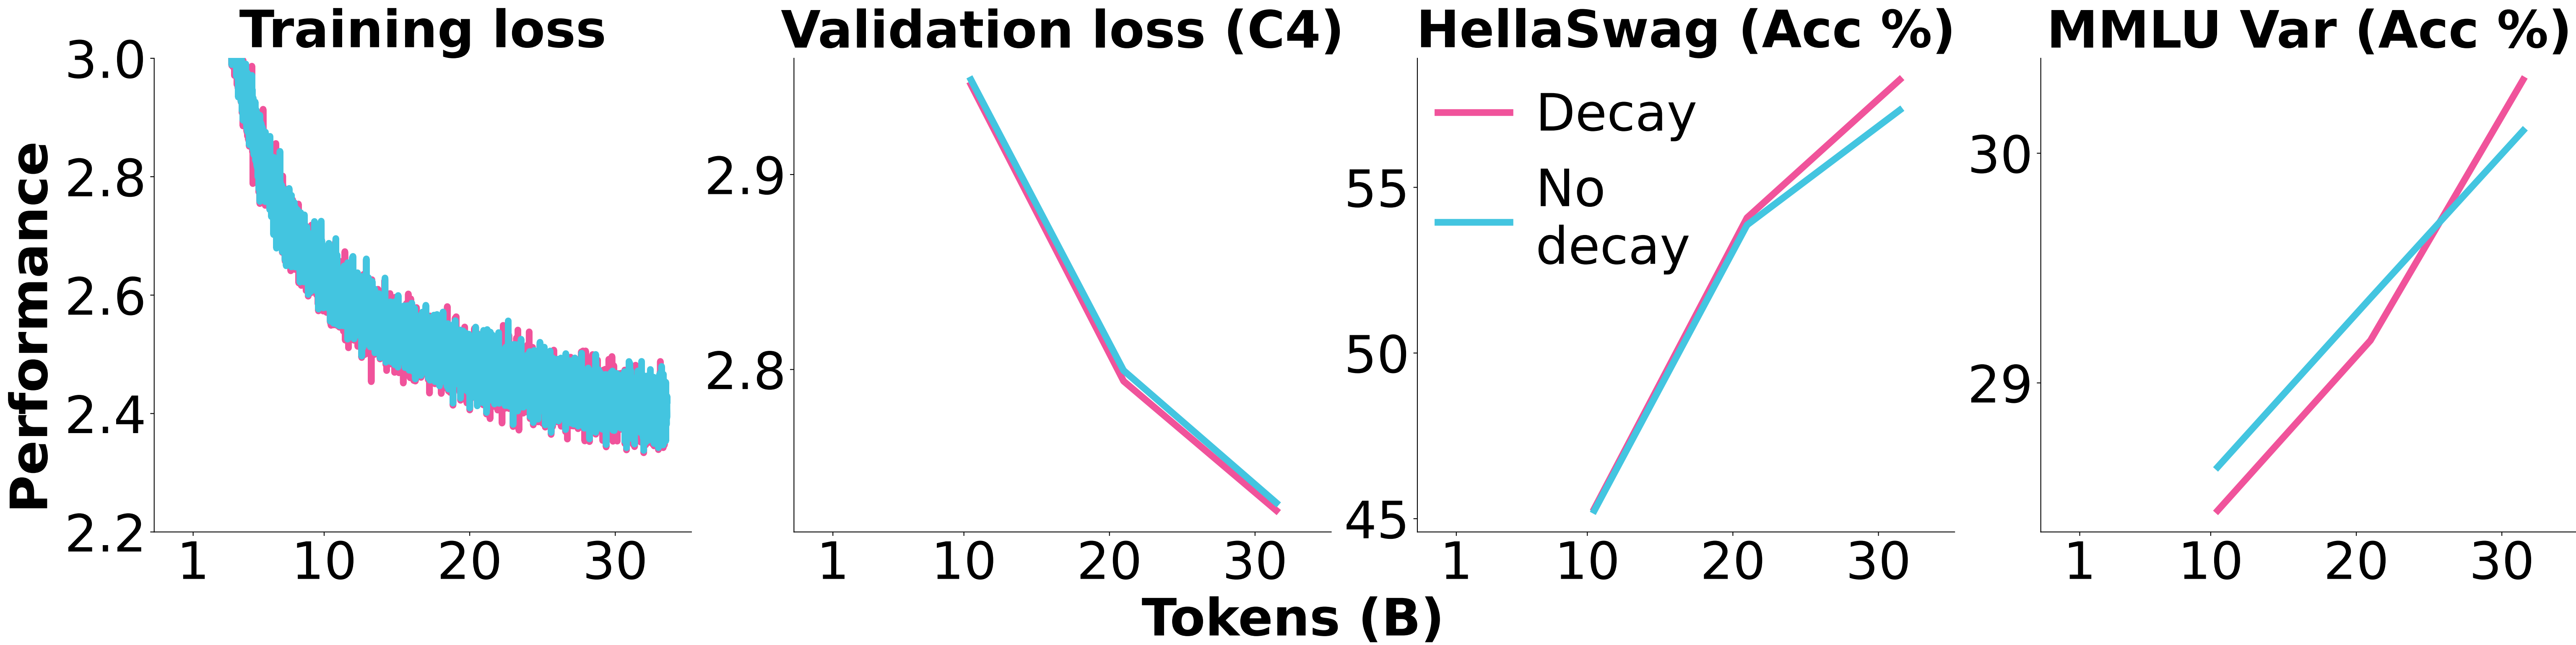

Supplement: supplementary_material [file lndecay.pdf › RoMA_Code/visuals/figures/lndecay.pdf]

# Total gradient norm

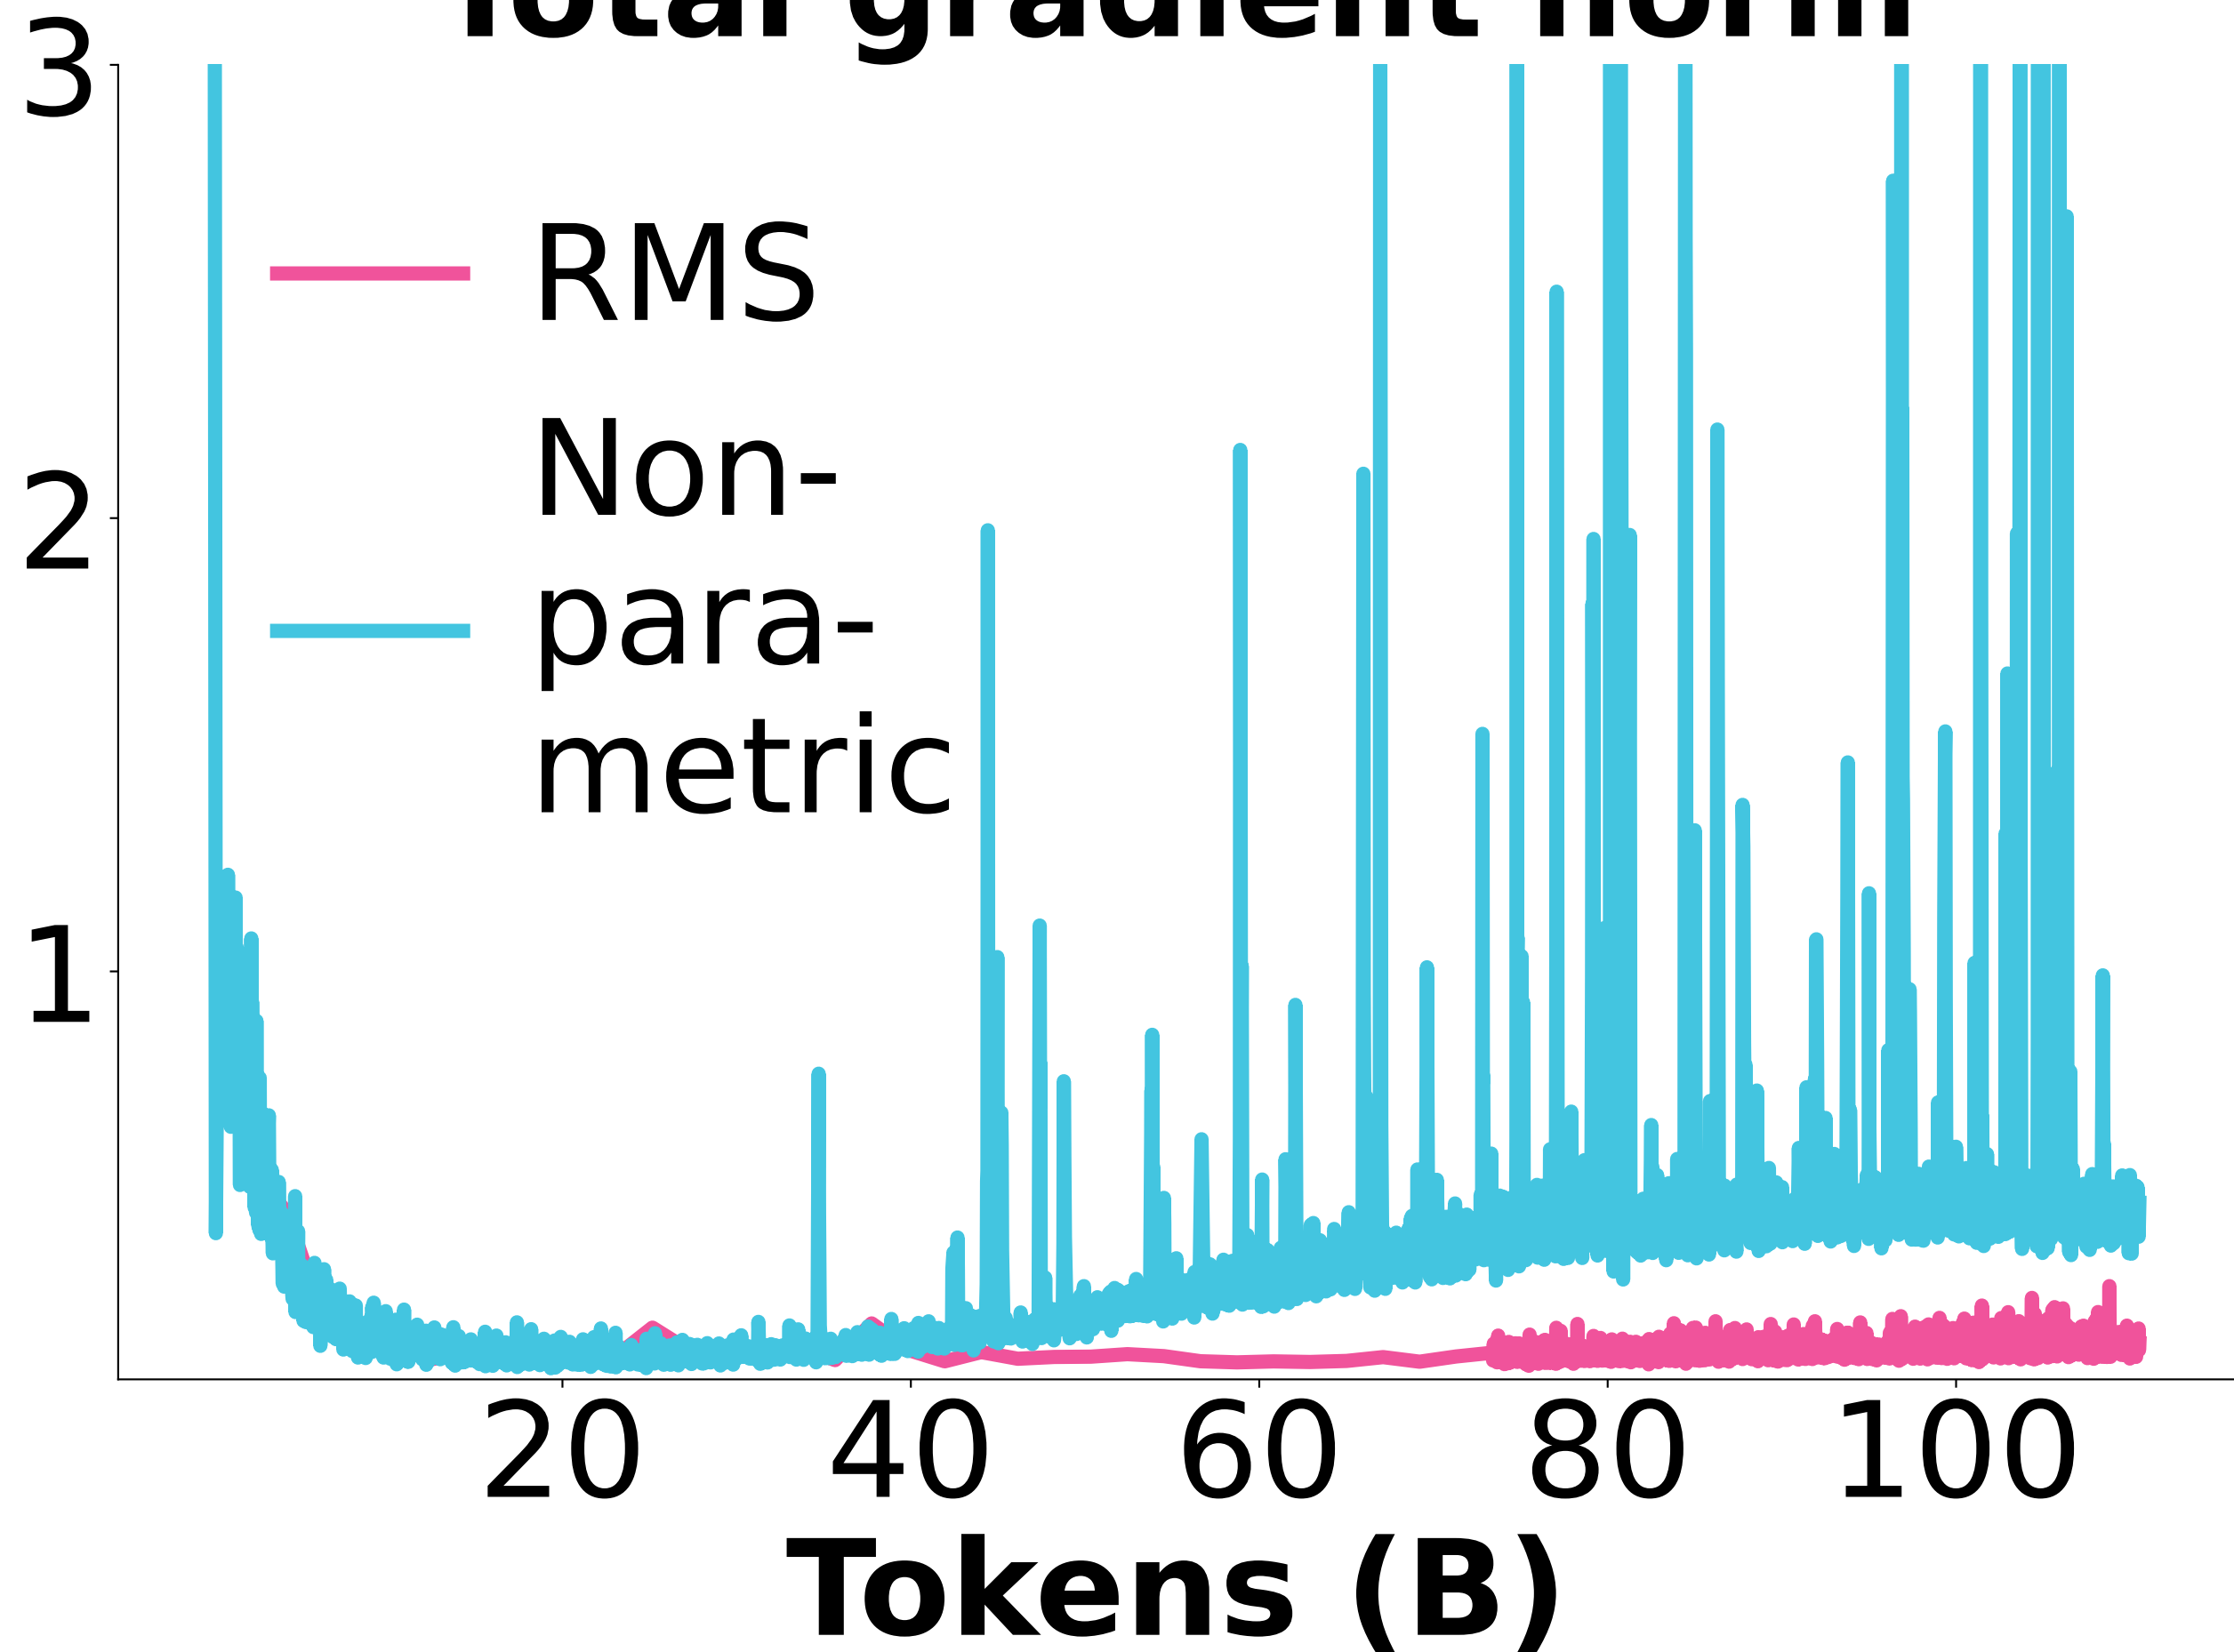

Supplement: supplementary_material [file lngradnorm.pdf › RoMA_Code/visuals/figures/lngradnorm.pdf]

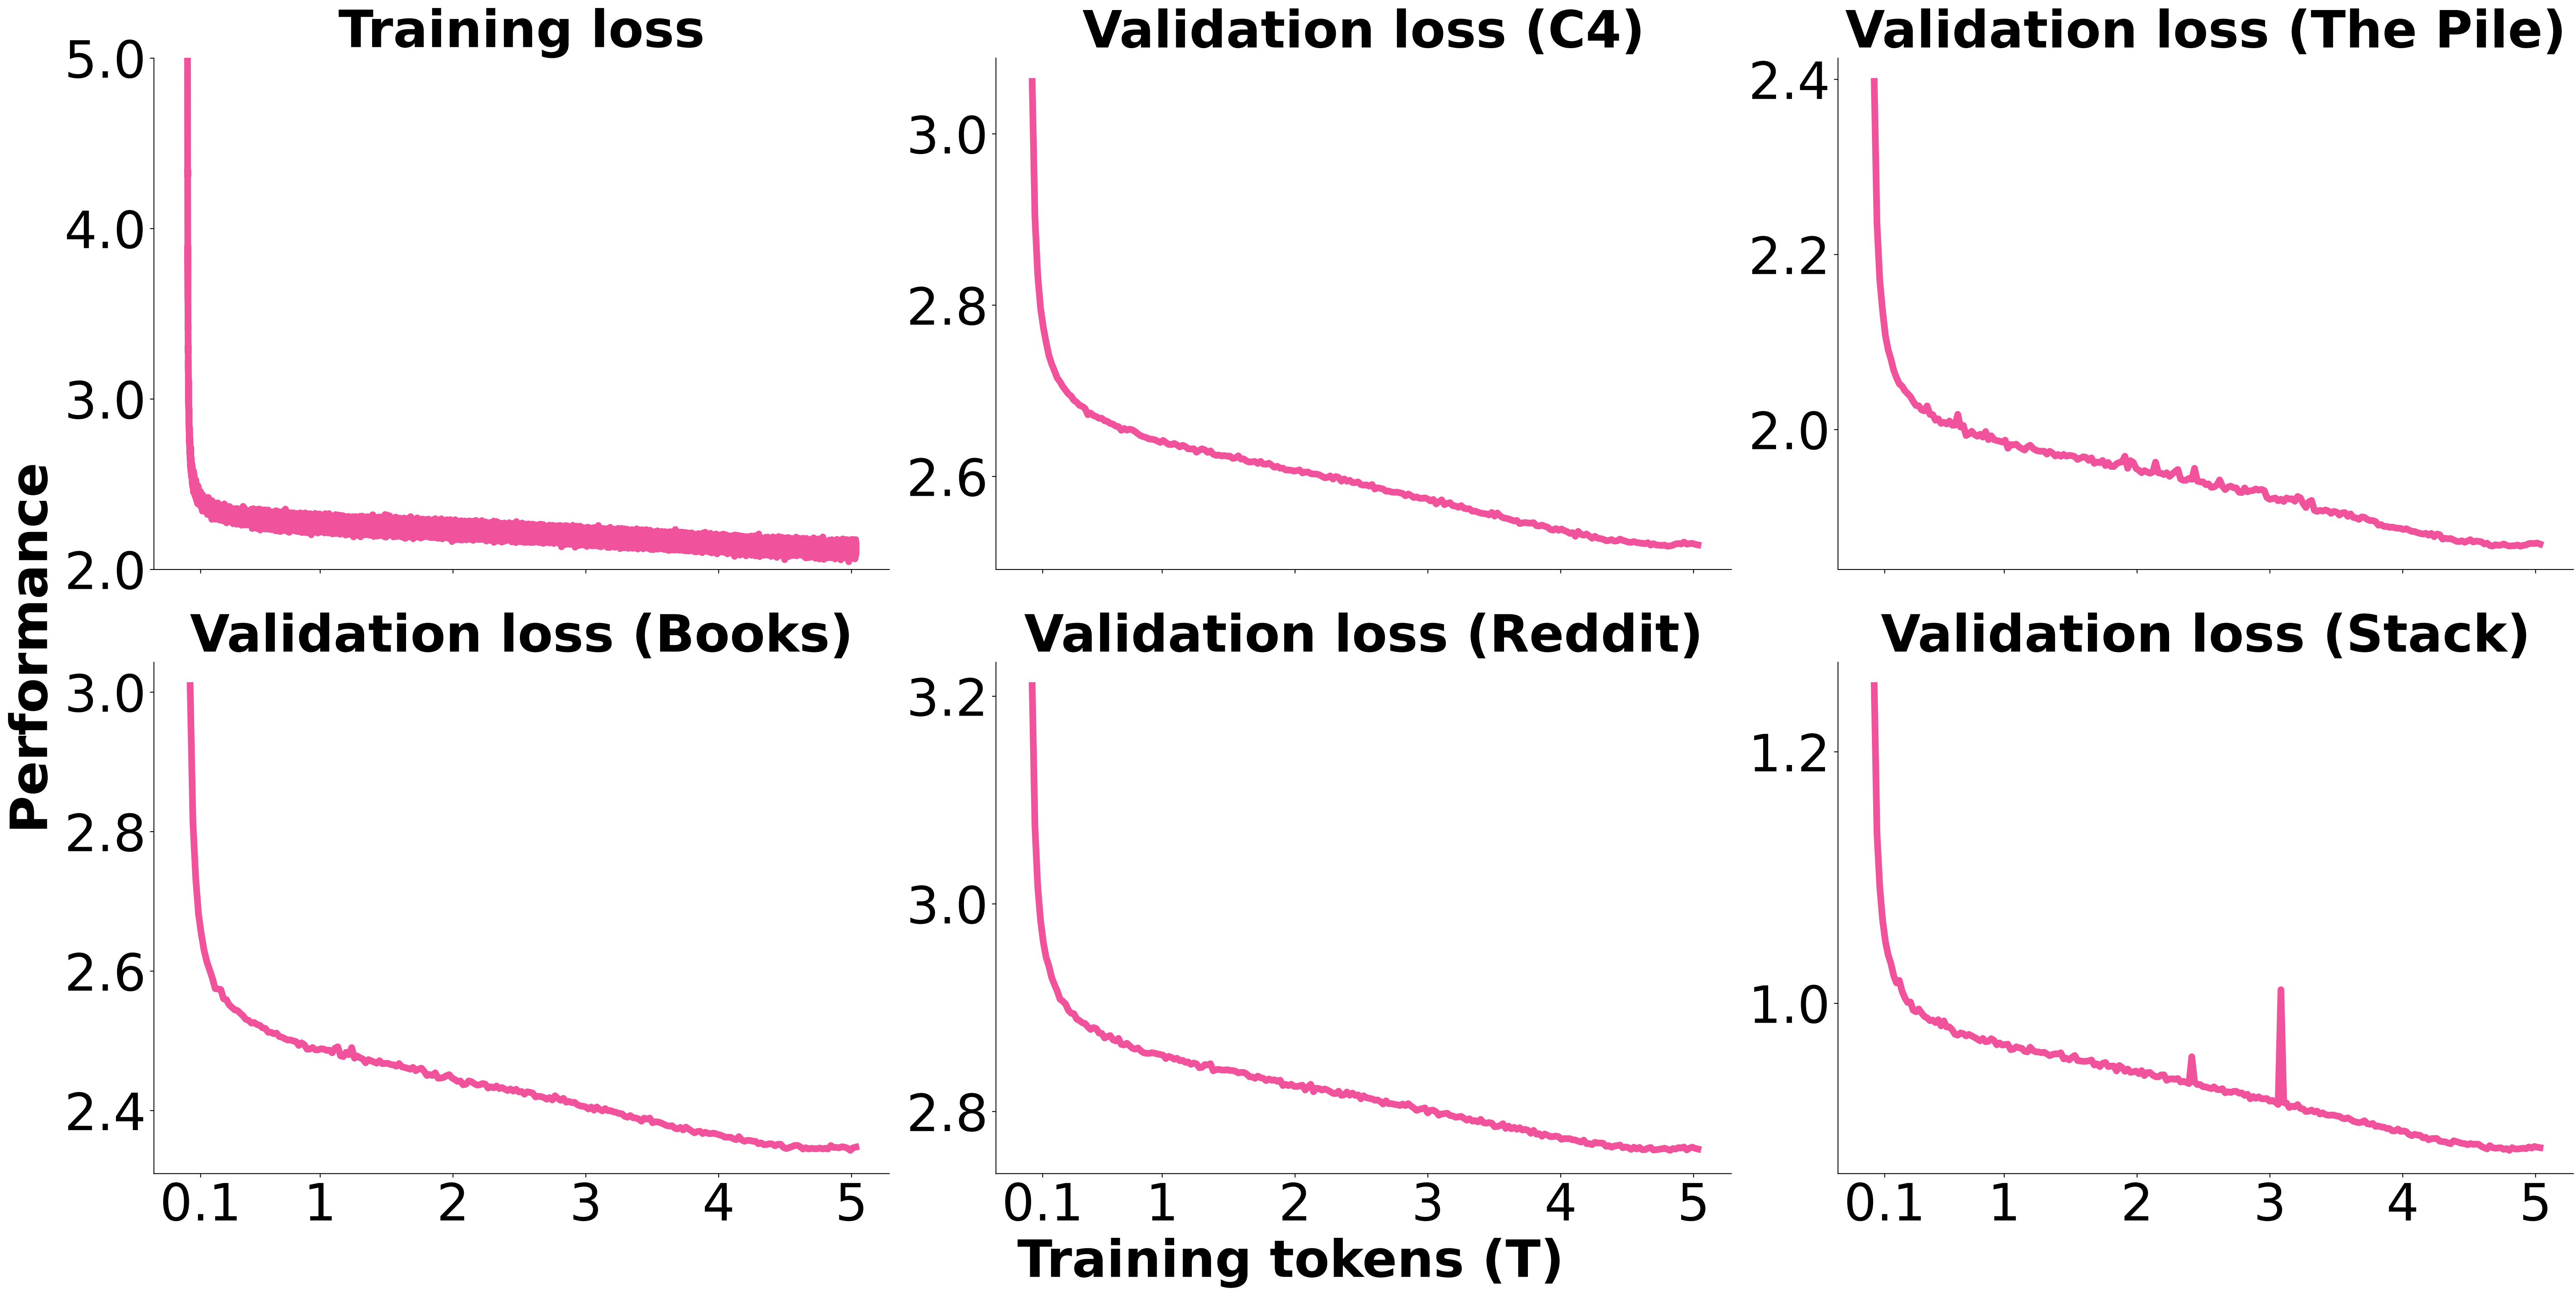

Supplement: supplementary_material [file loss.pdf › RoMA_Code/visuals/figures/loss.pdf]

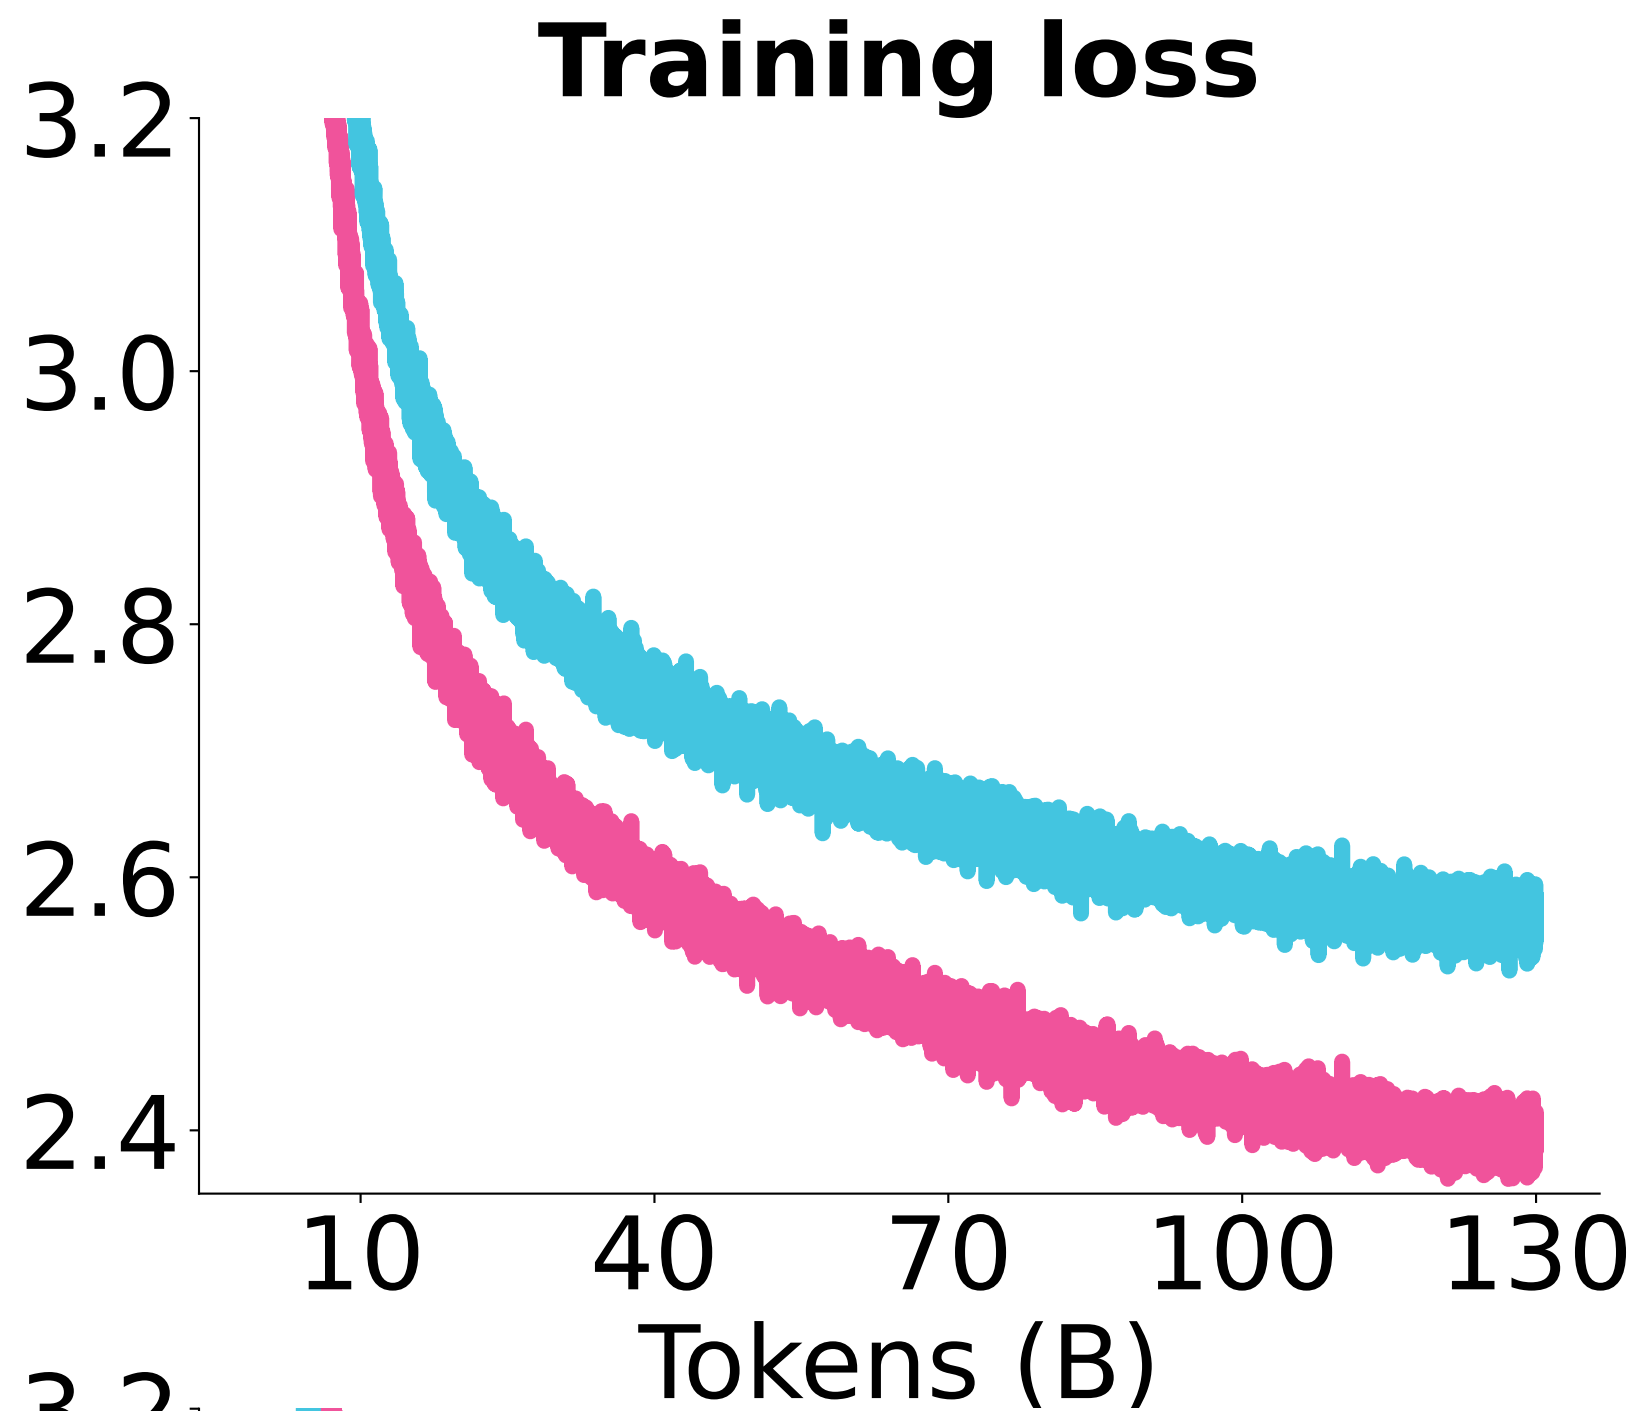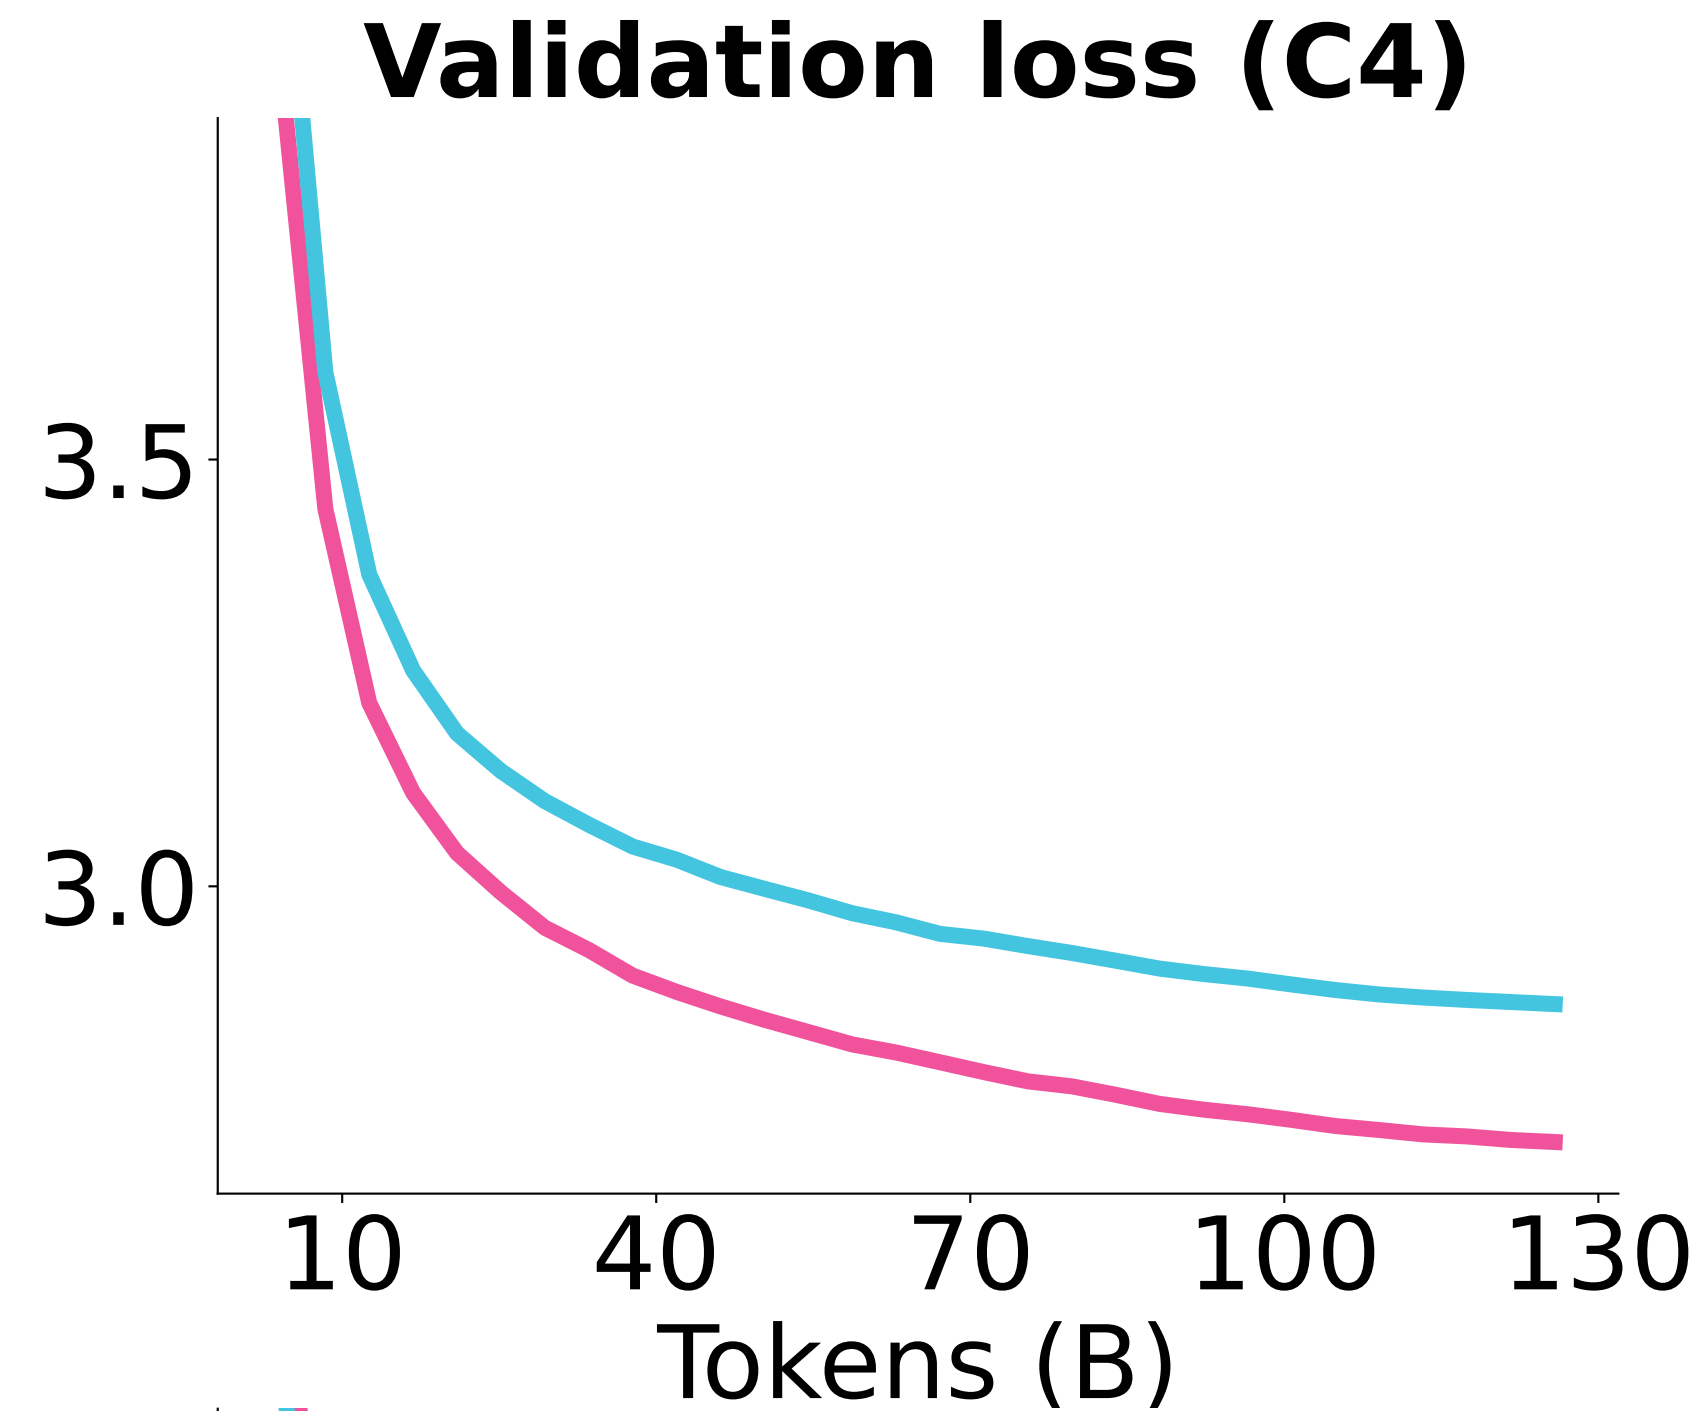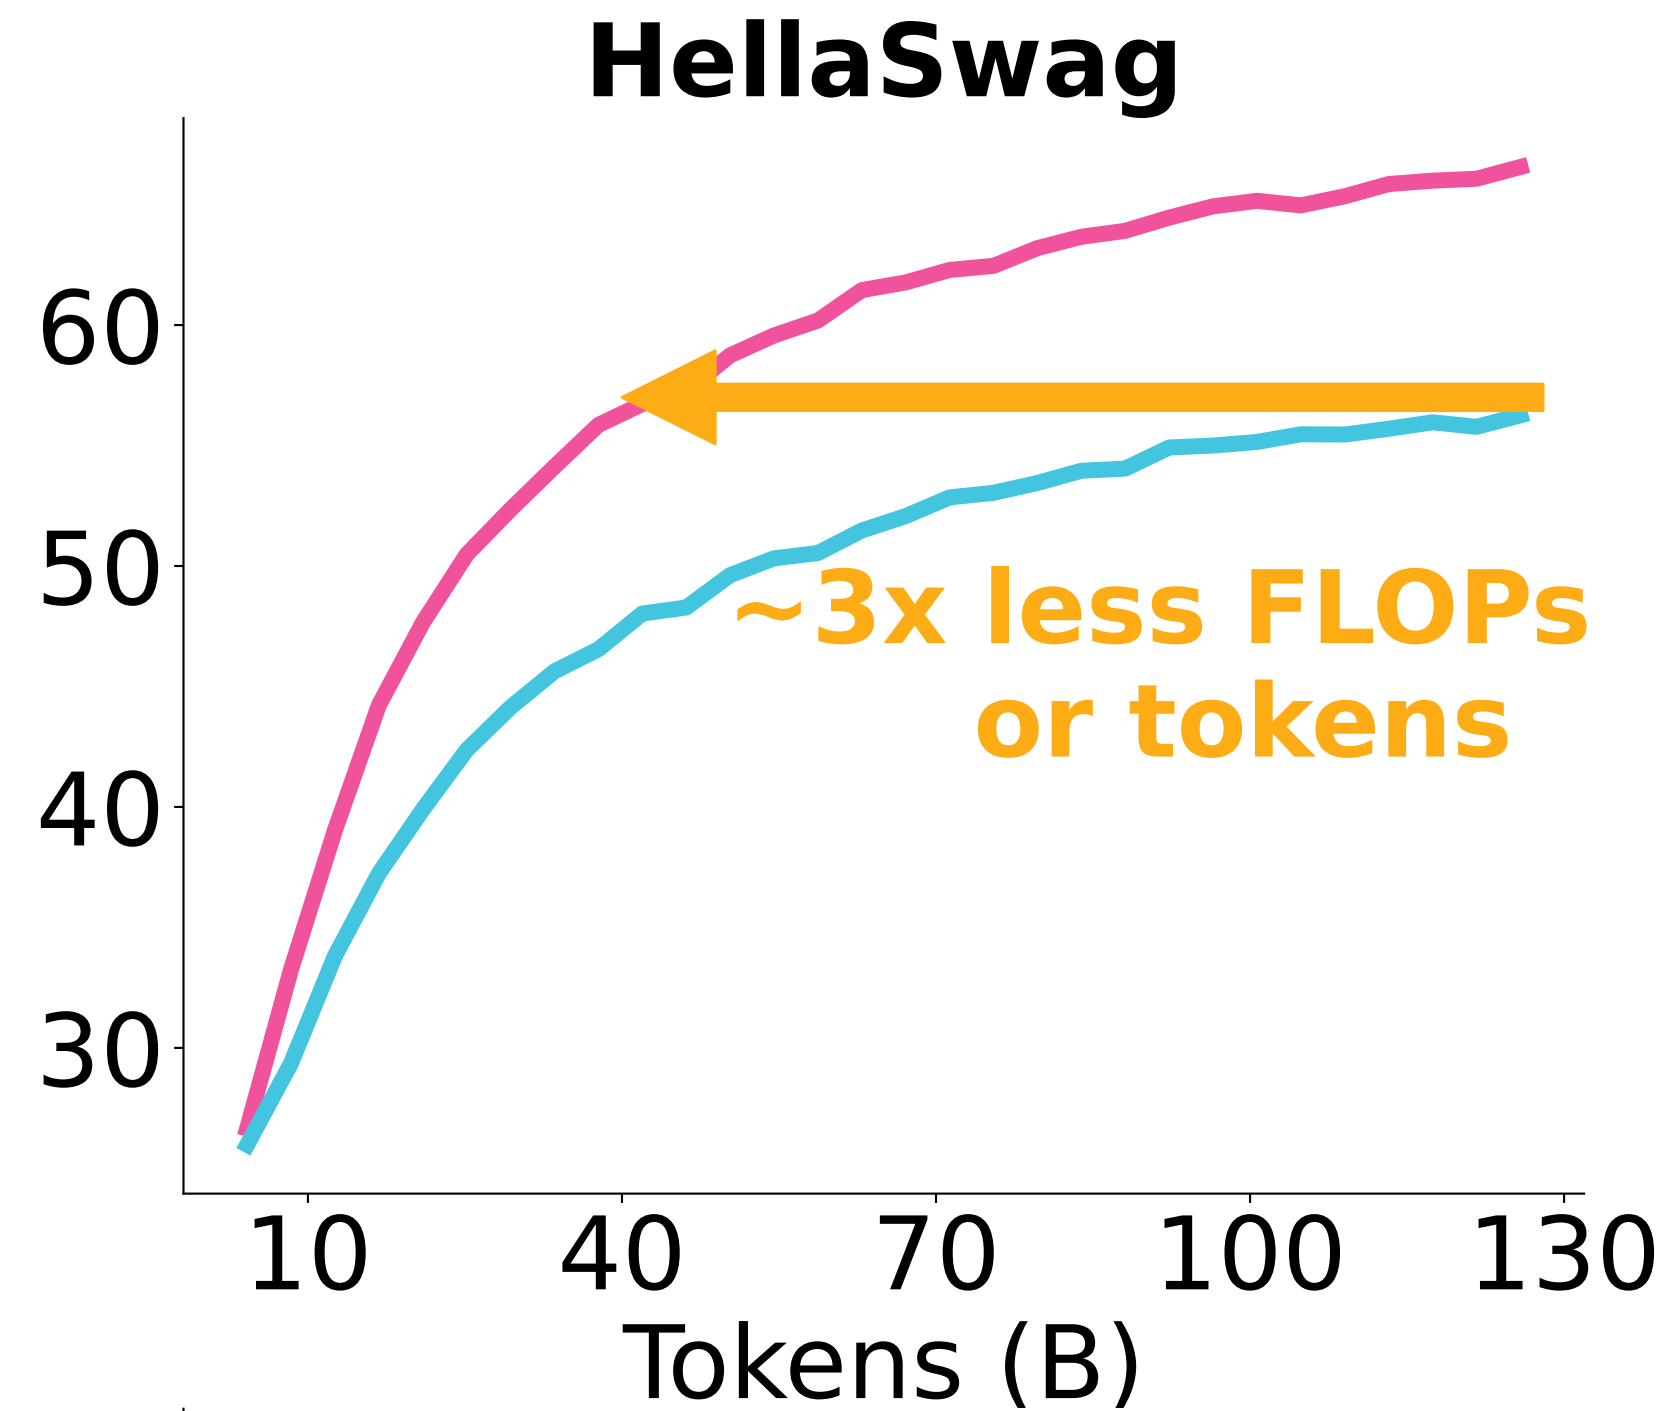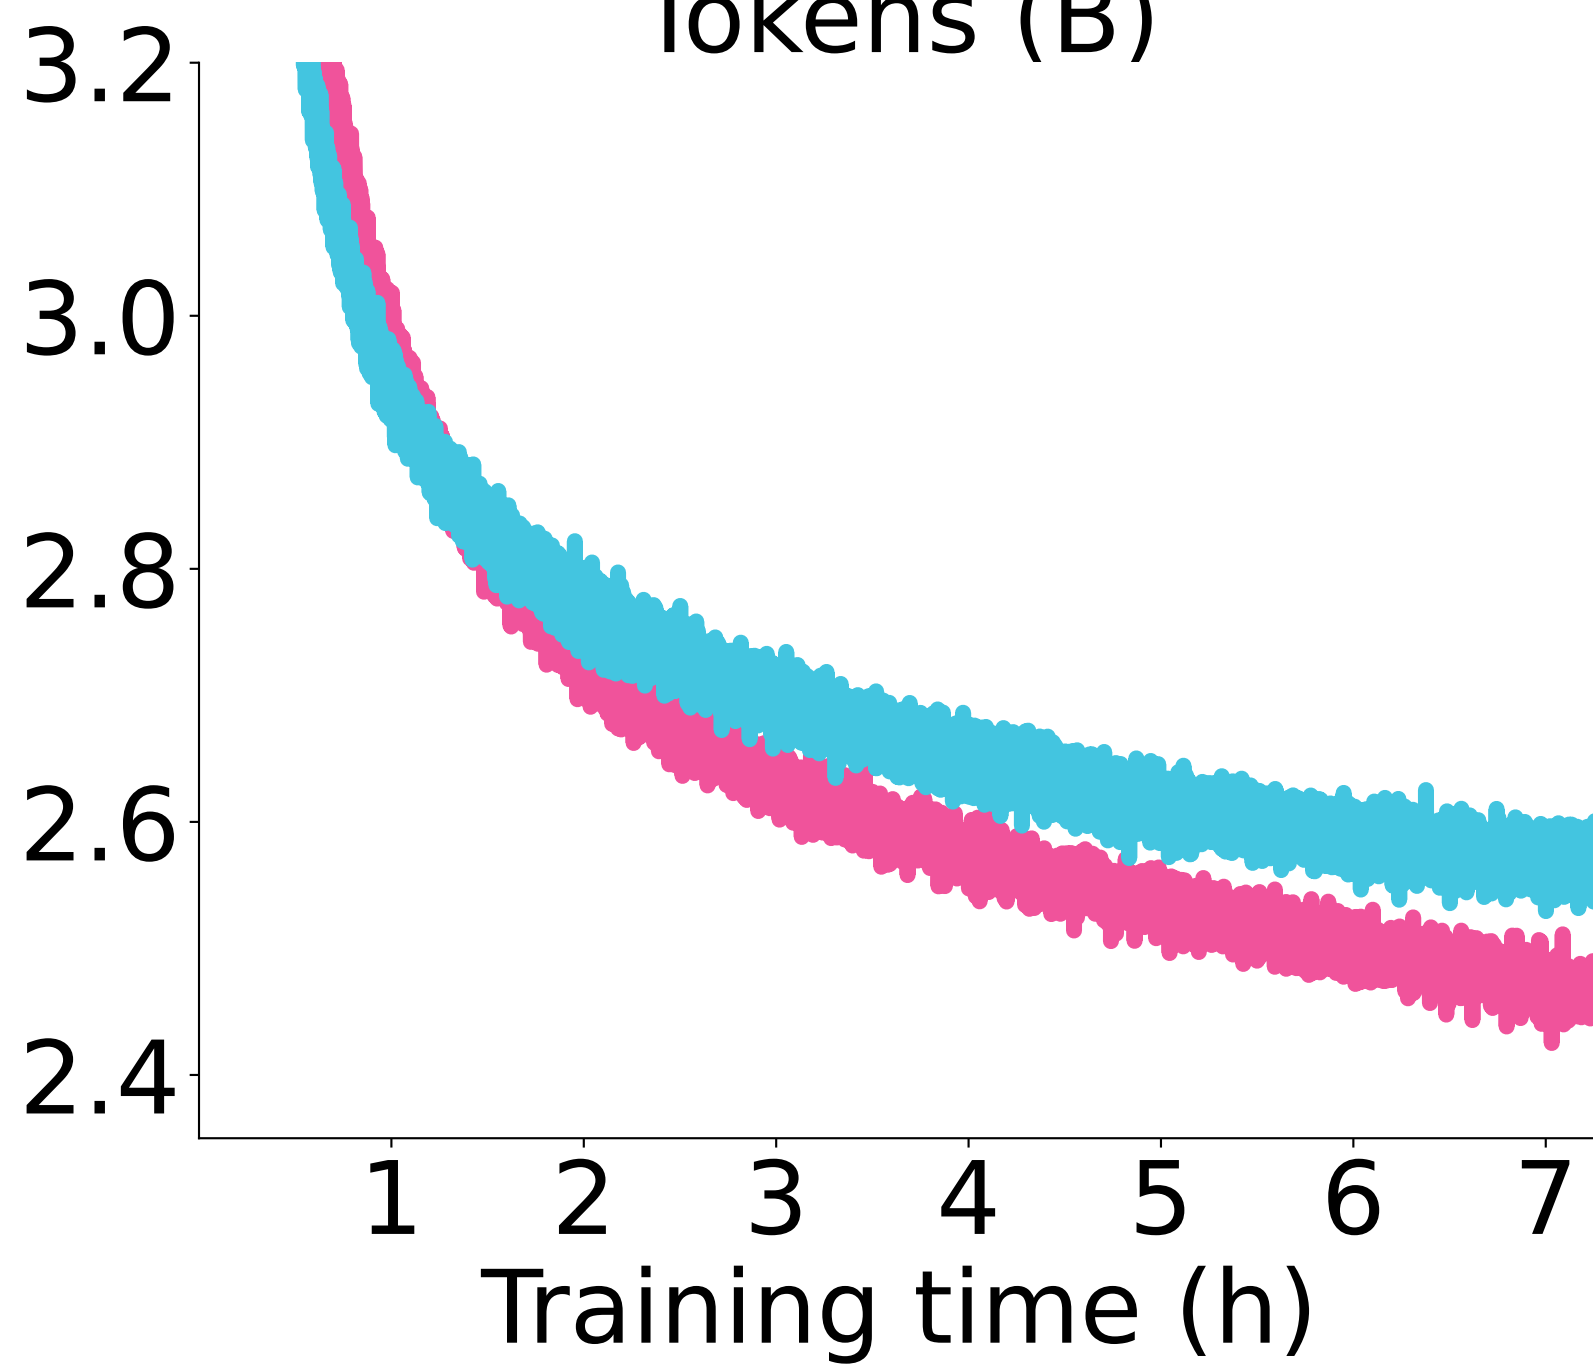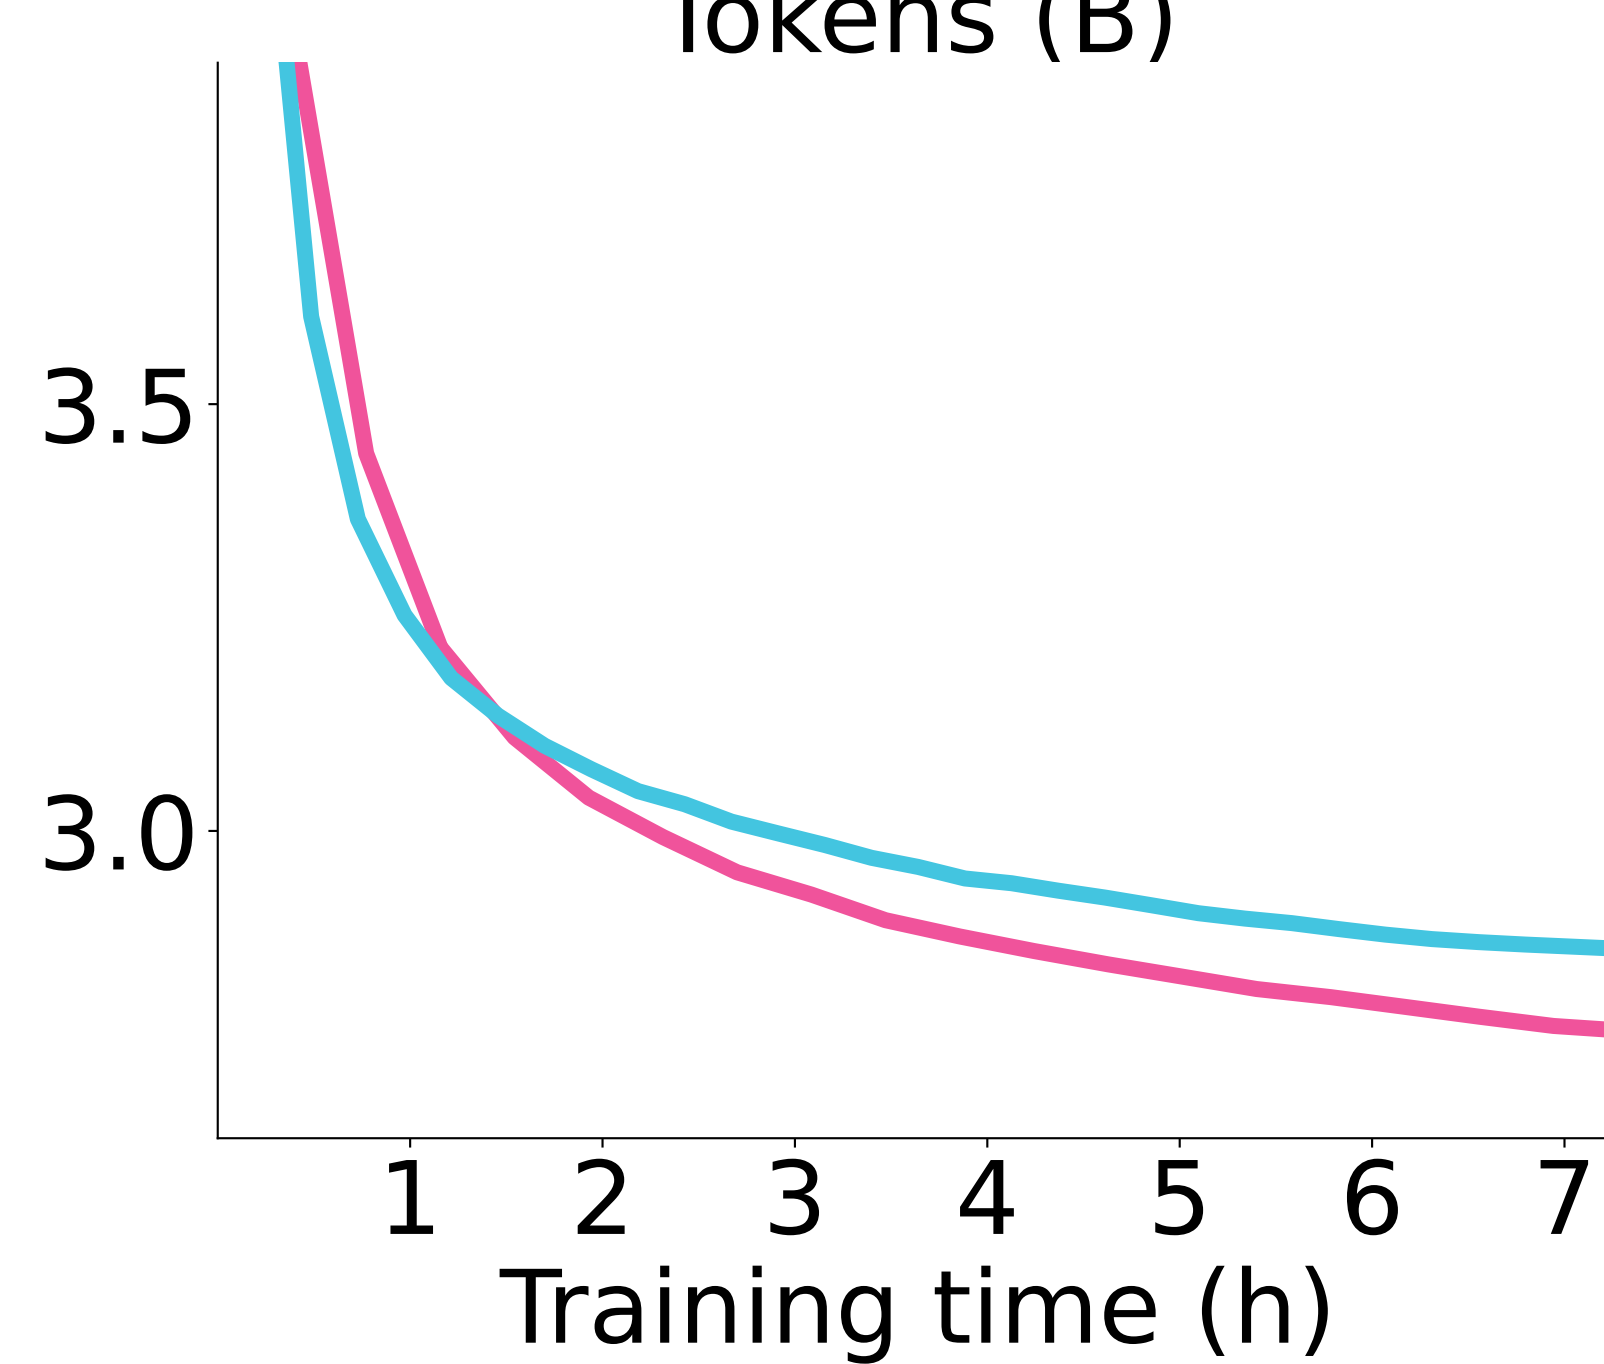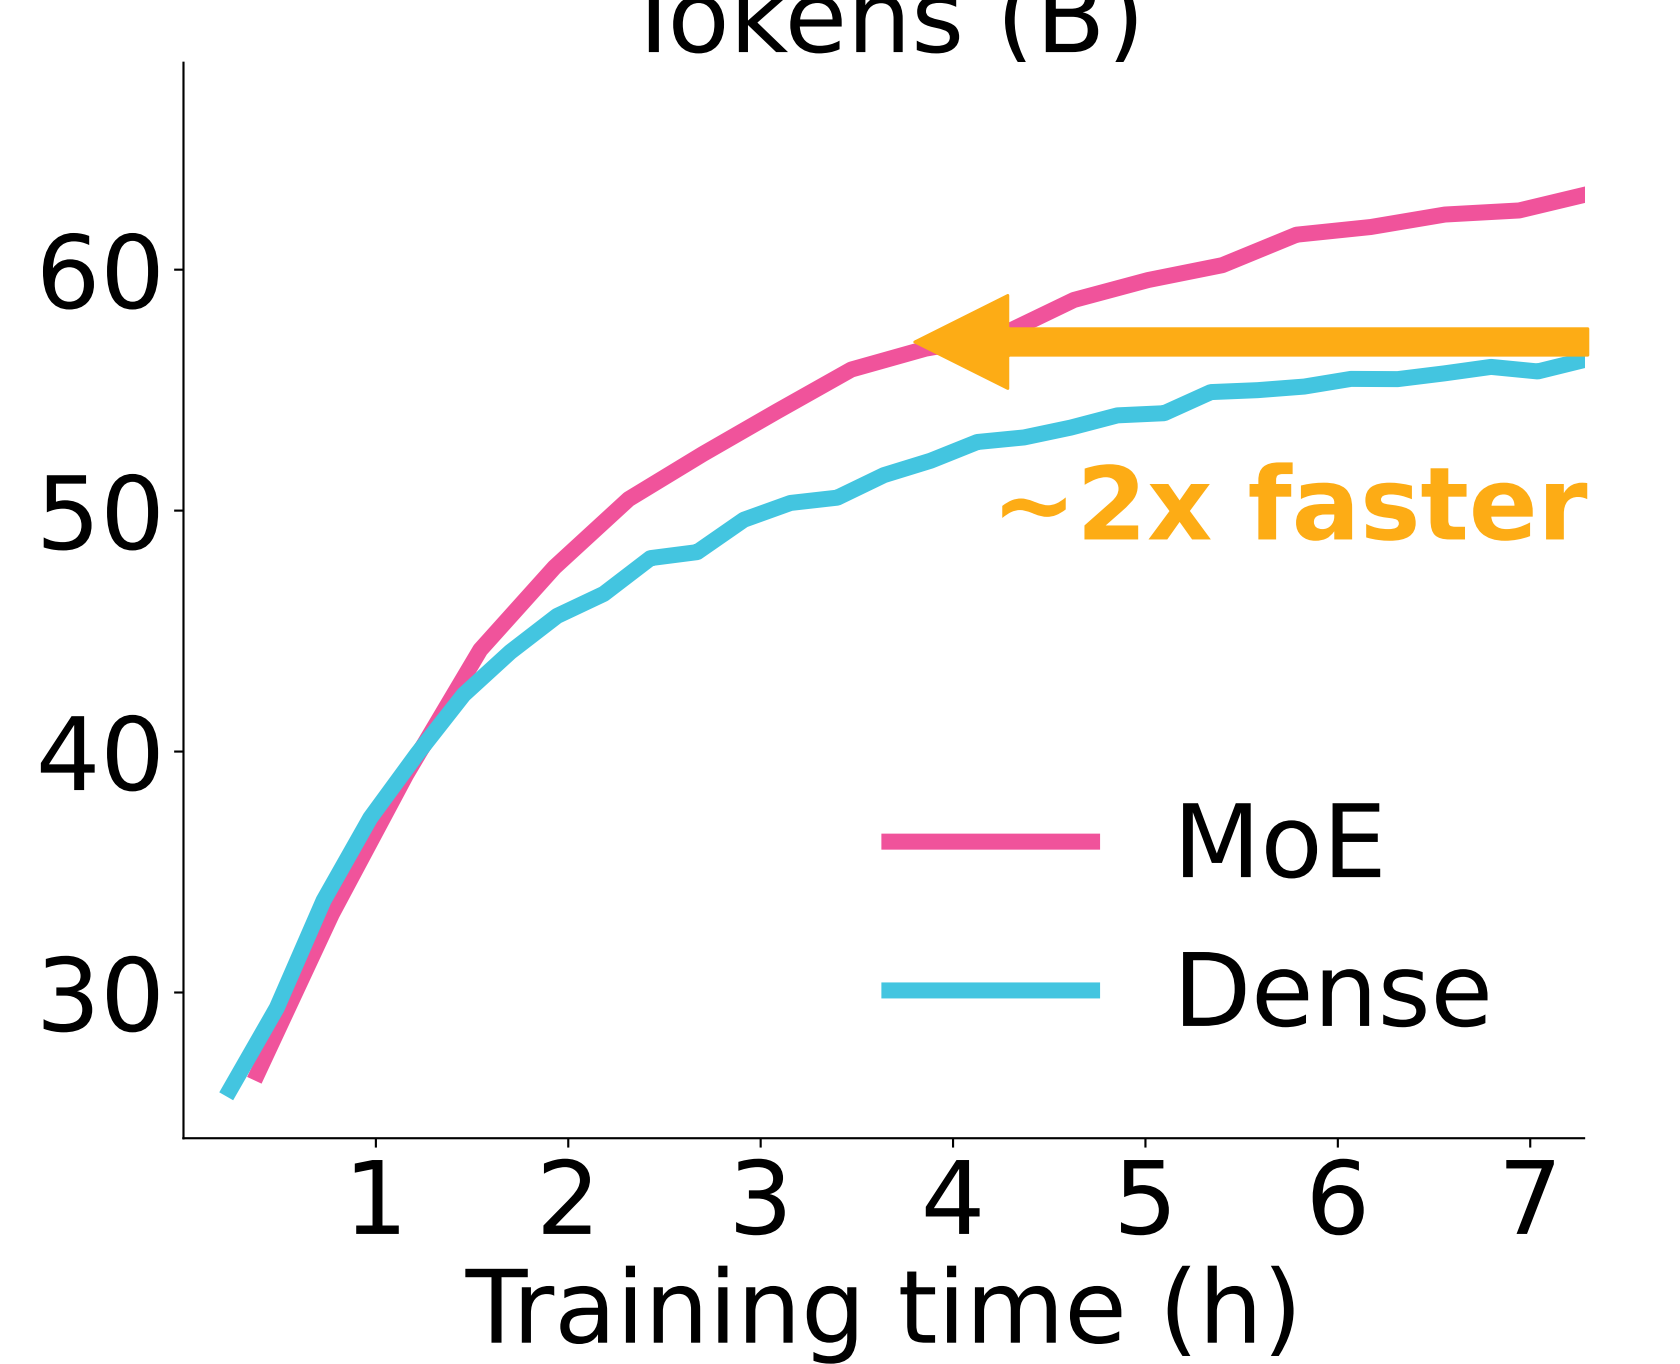

Supplement: supplementary_material [file moevsdense.pdf › RoMA_Code/visuals/figures/moevsdense.pdf]

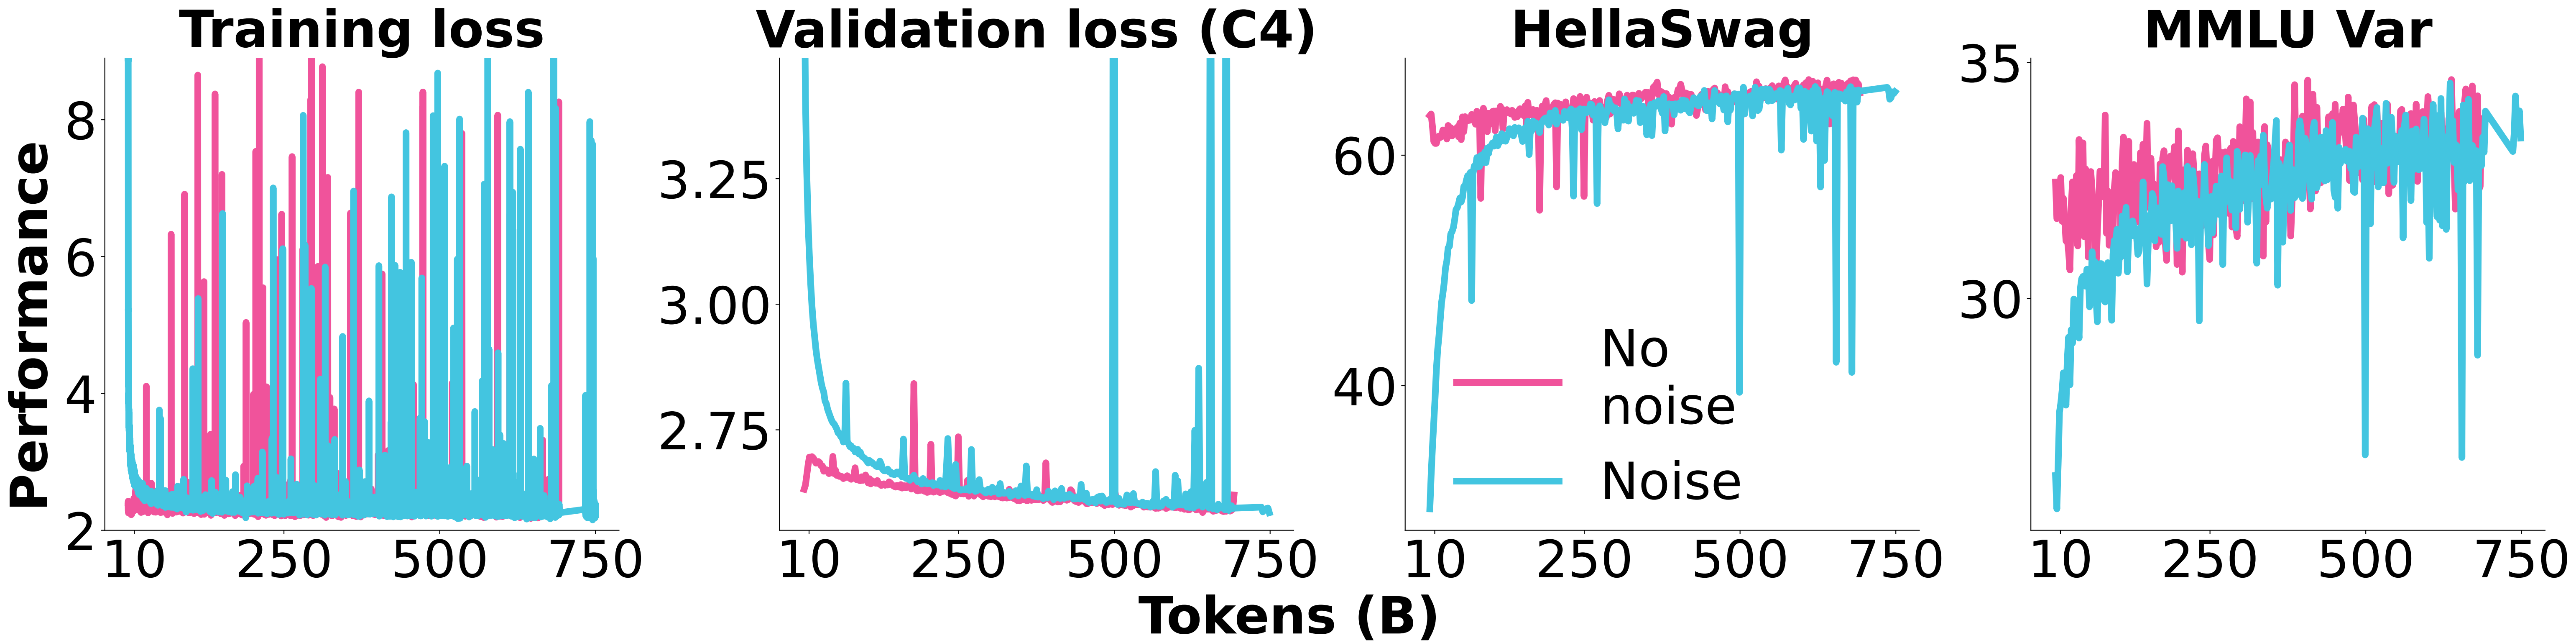

Supplement: supplementary_material [file noise.pdf › RoMA_Code/visuals/figures/noise.pdf]

## Dense LMs (OLMo, Llama...)

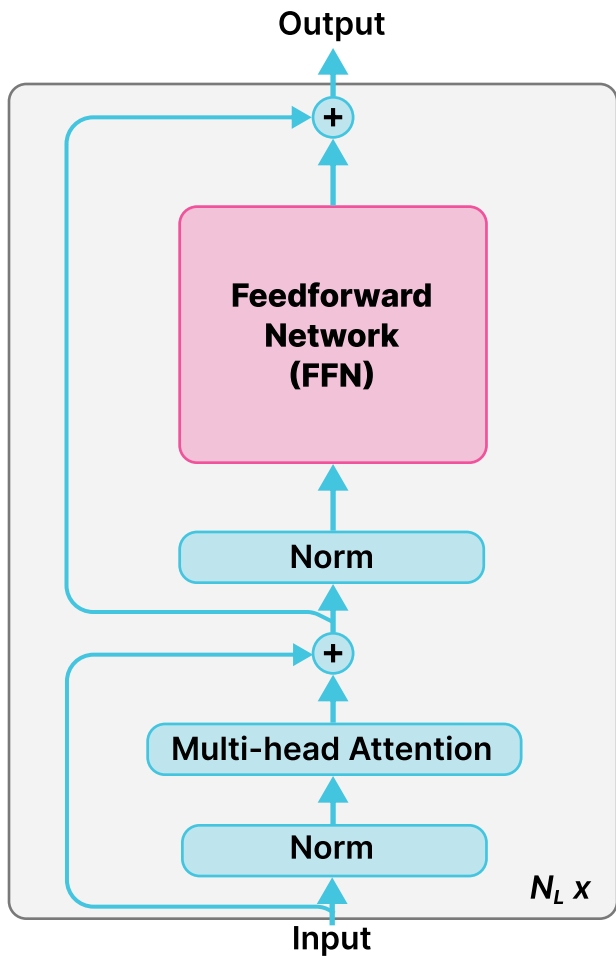

## OLMoE

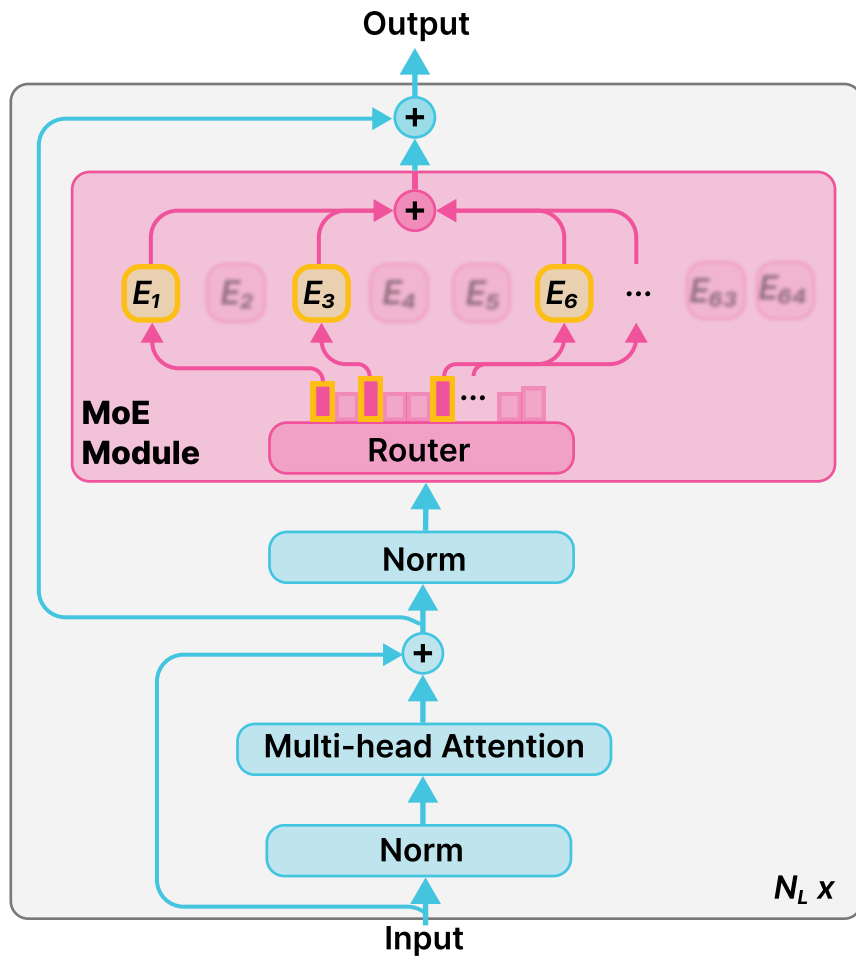

Supplement: supplementary_material [file olmoe.pdf › RoMA_Code/visuals/figures/olmoe.pdf]

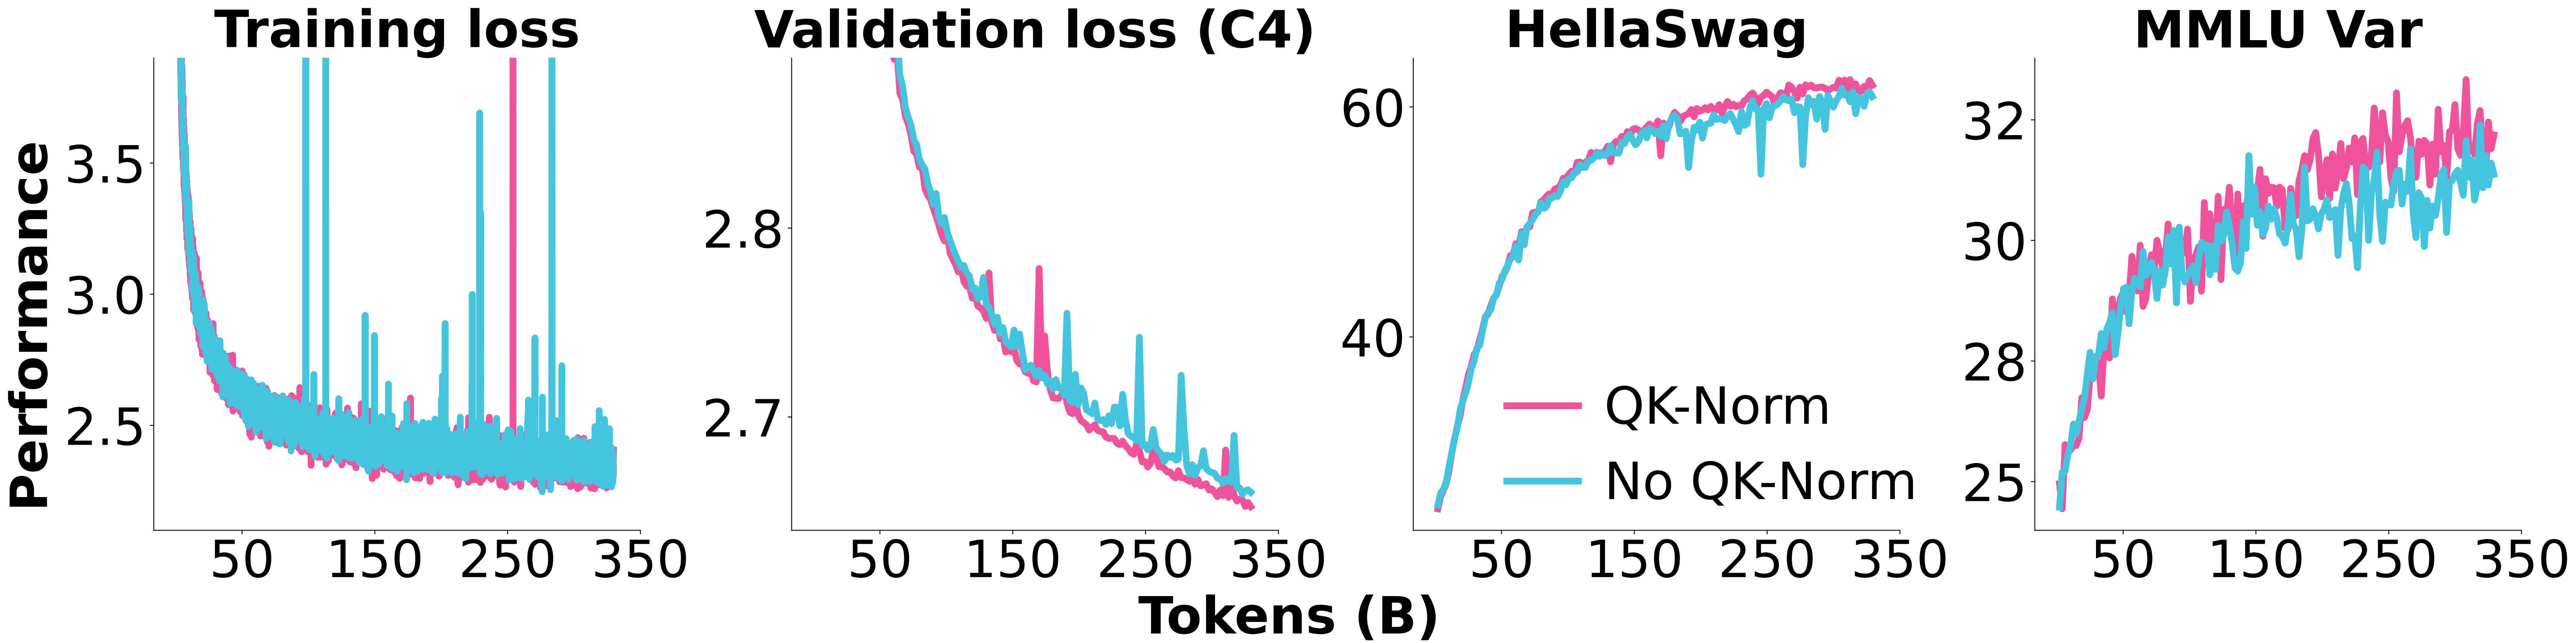

Supplement: supplementary_material [file qknorm.pdf › RoMA_Code/visuals/figures/qknorm.pdf]

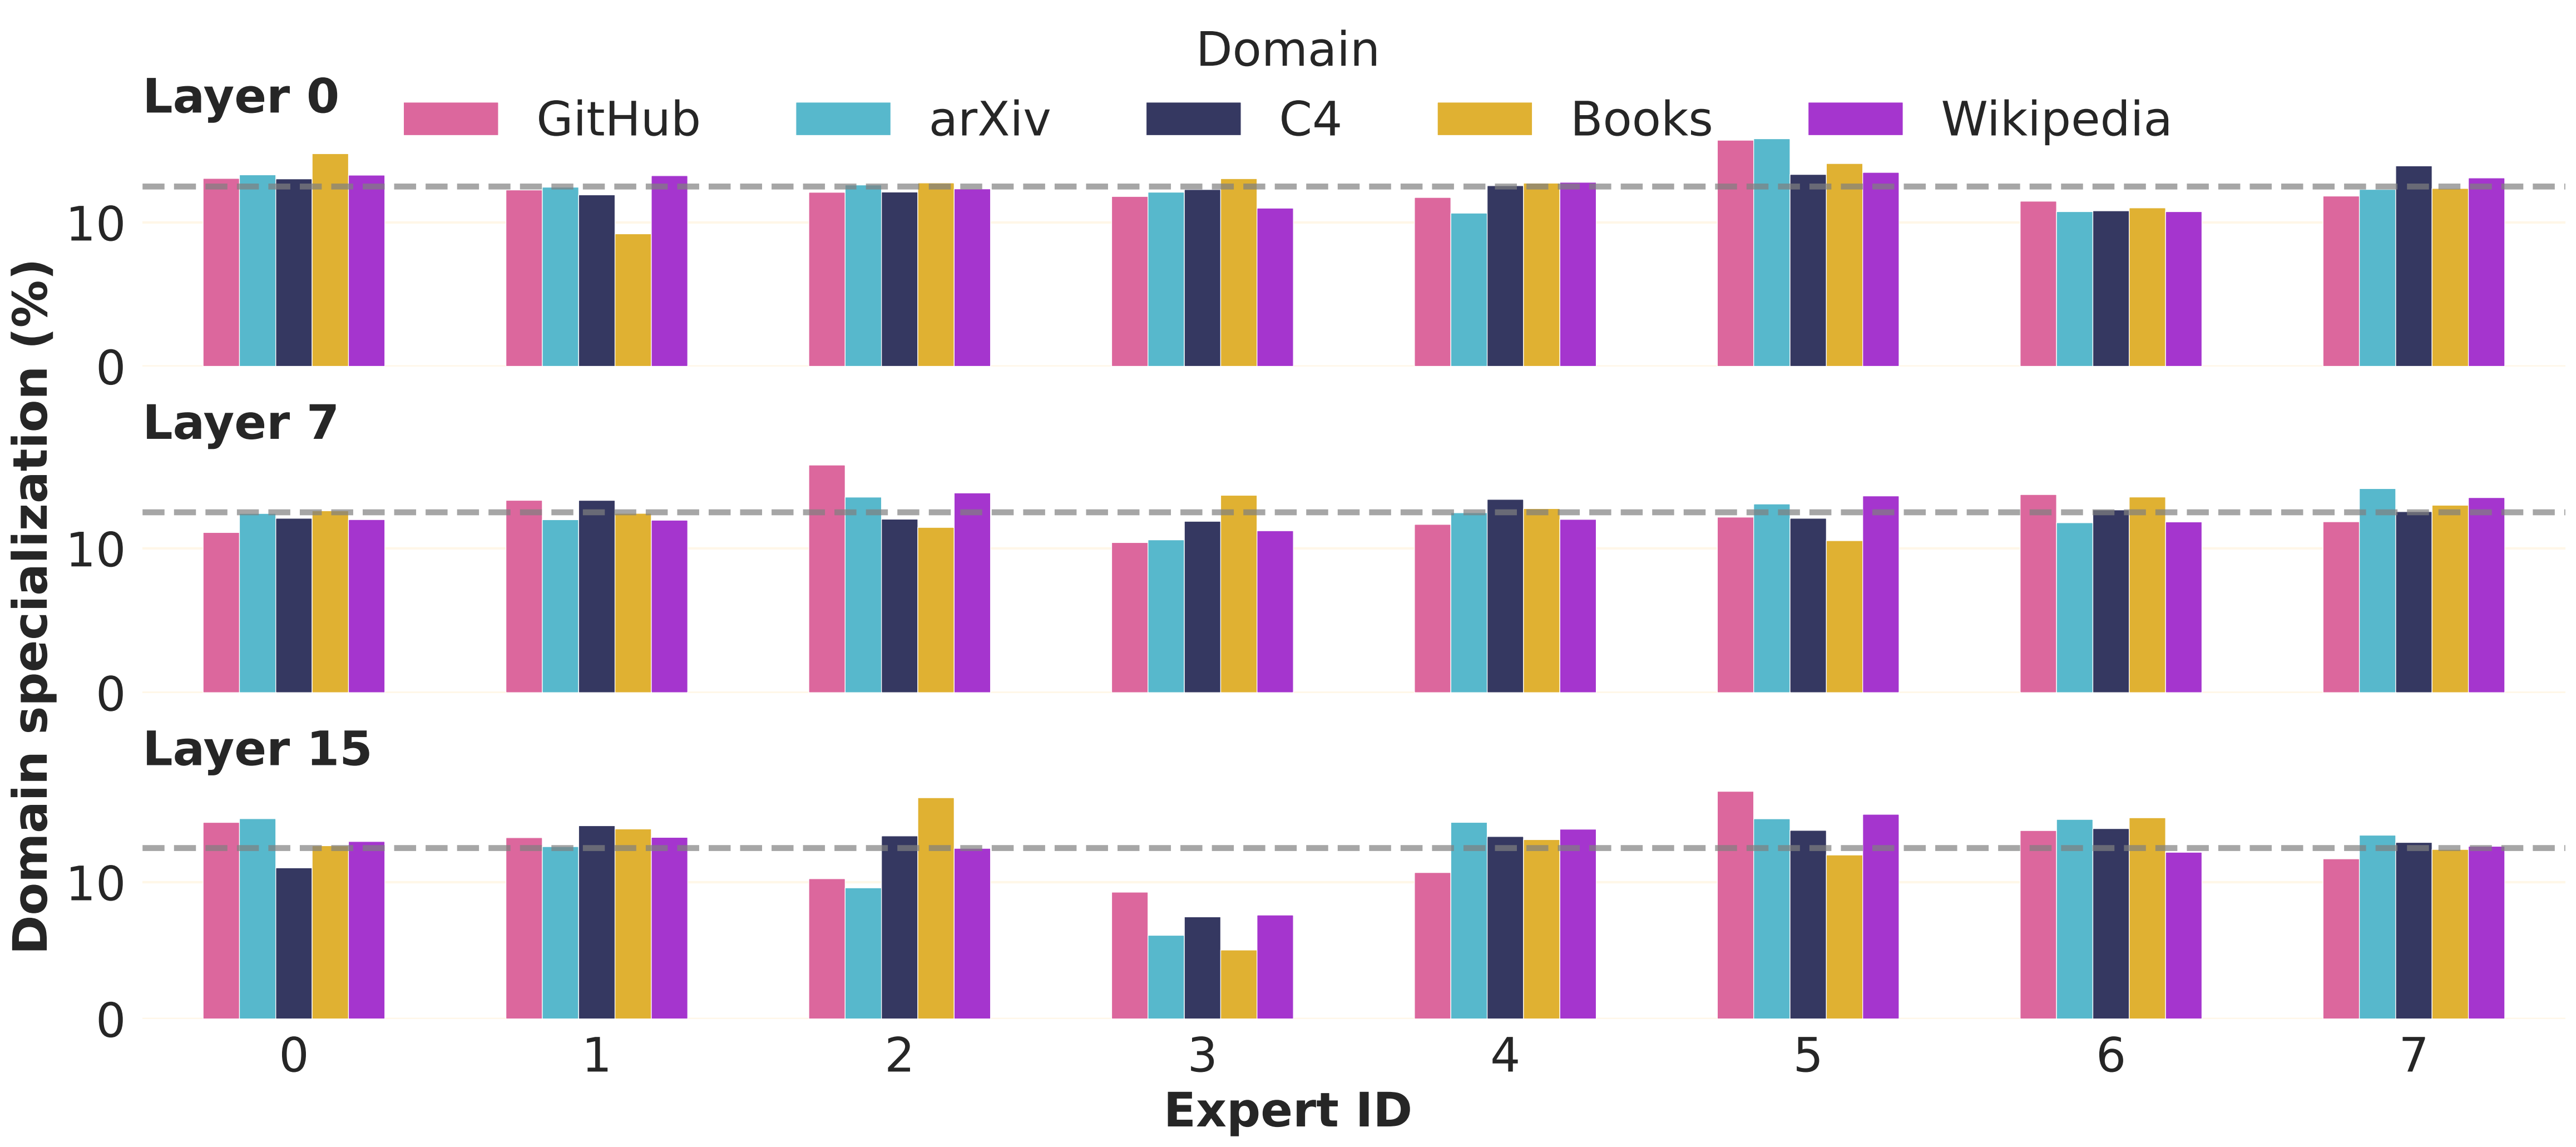

Supplement: supplementary_material [file routing_mixtral.pdf › RoMA_Code/visuals/figures/routing_mixtral.pdf]

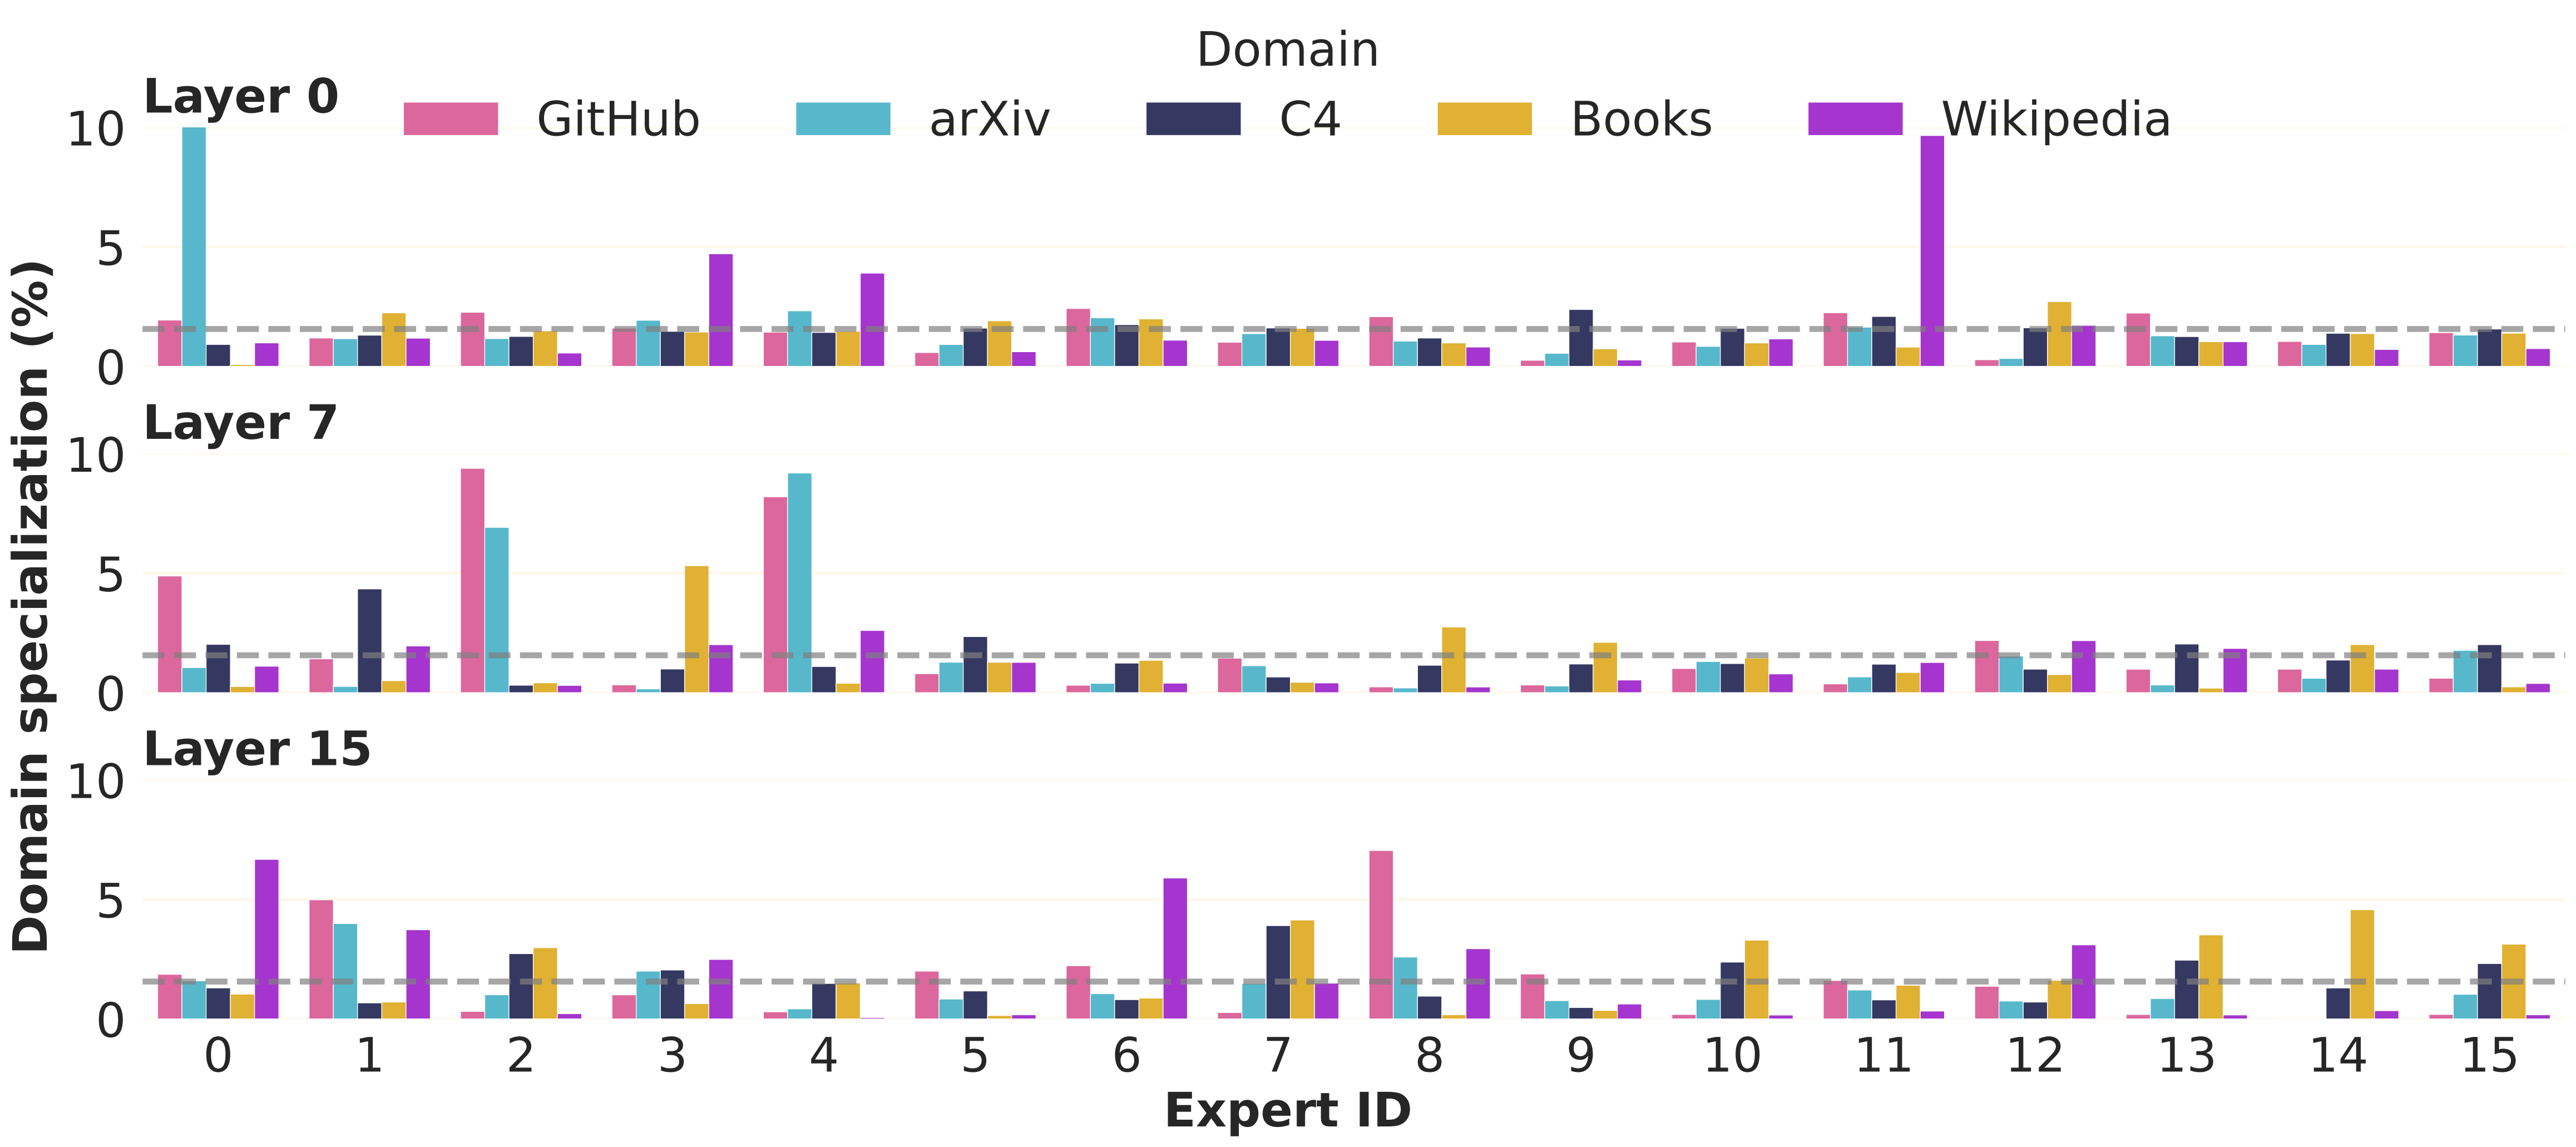

Supplement: supplementary_material [file routing_olmoe.pdf › RoMA_Code/visuals/figures/routing_olmoe.pdf]

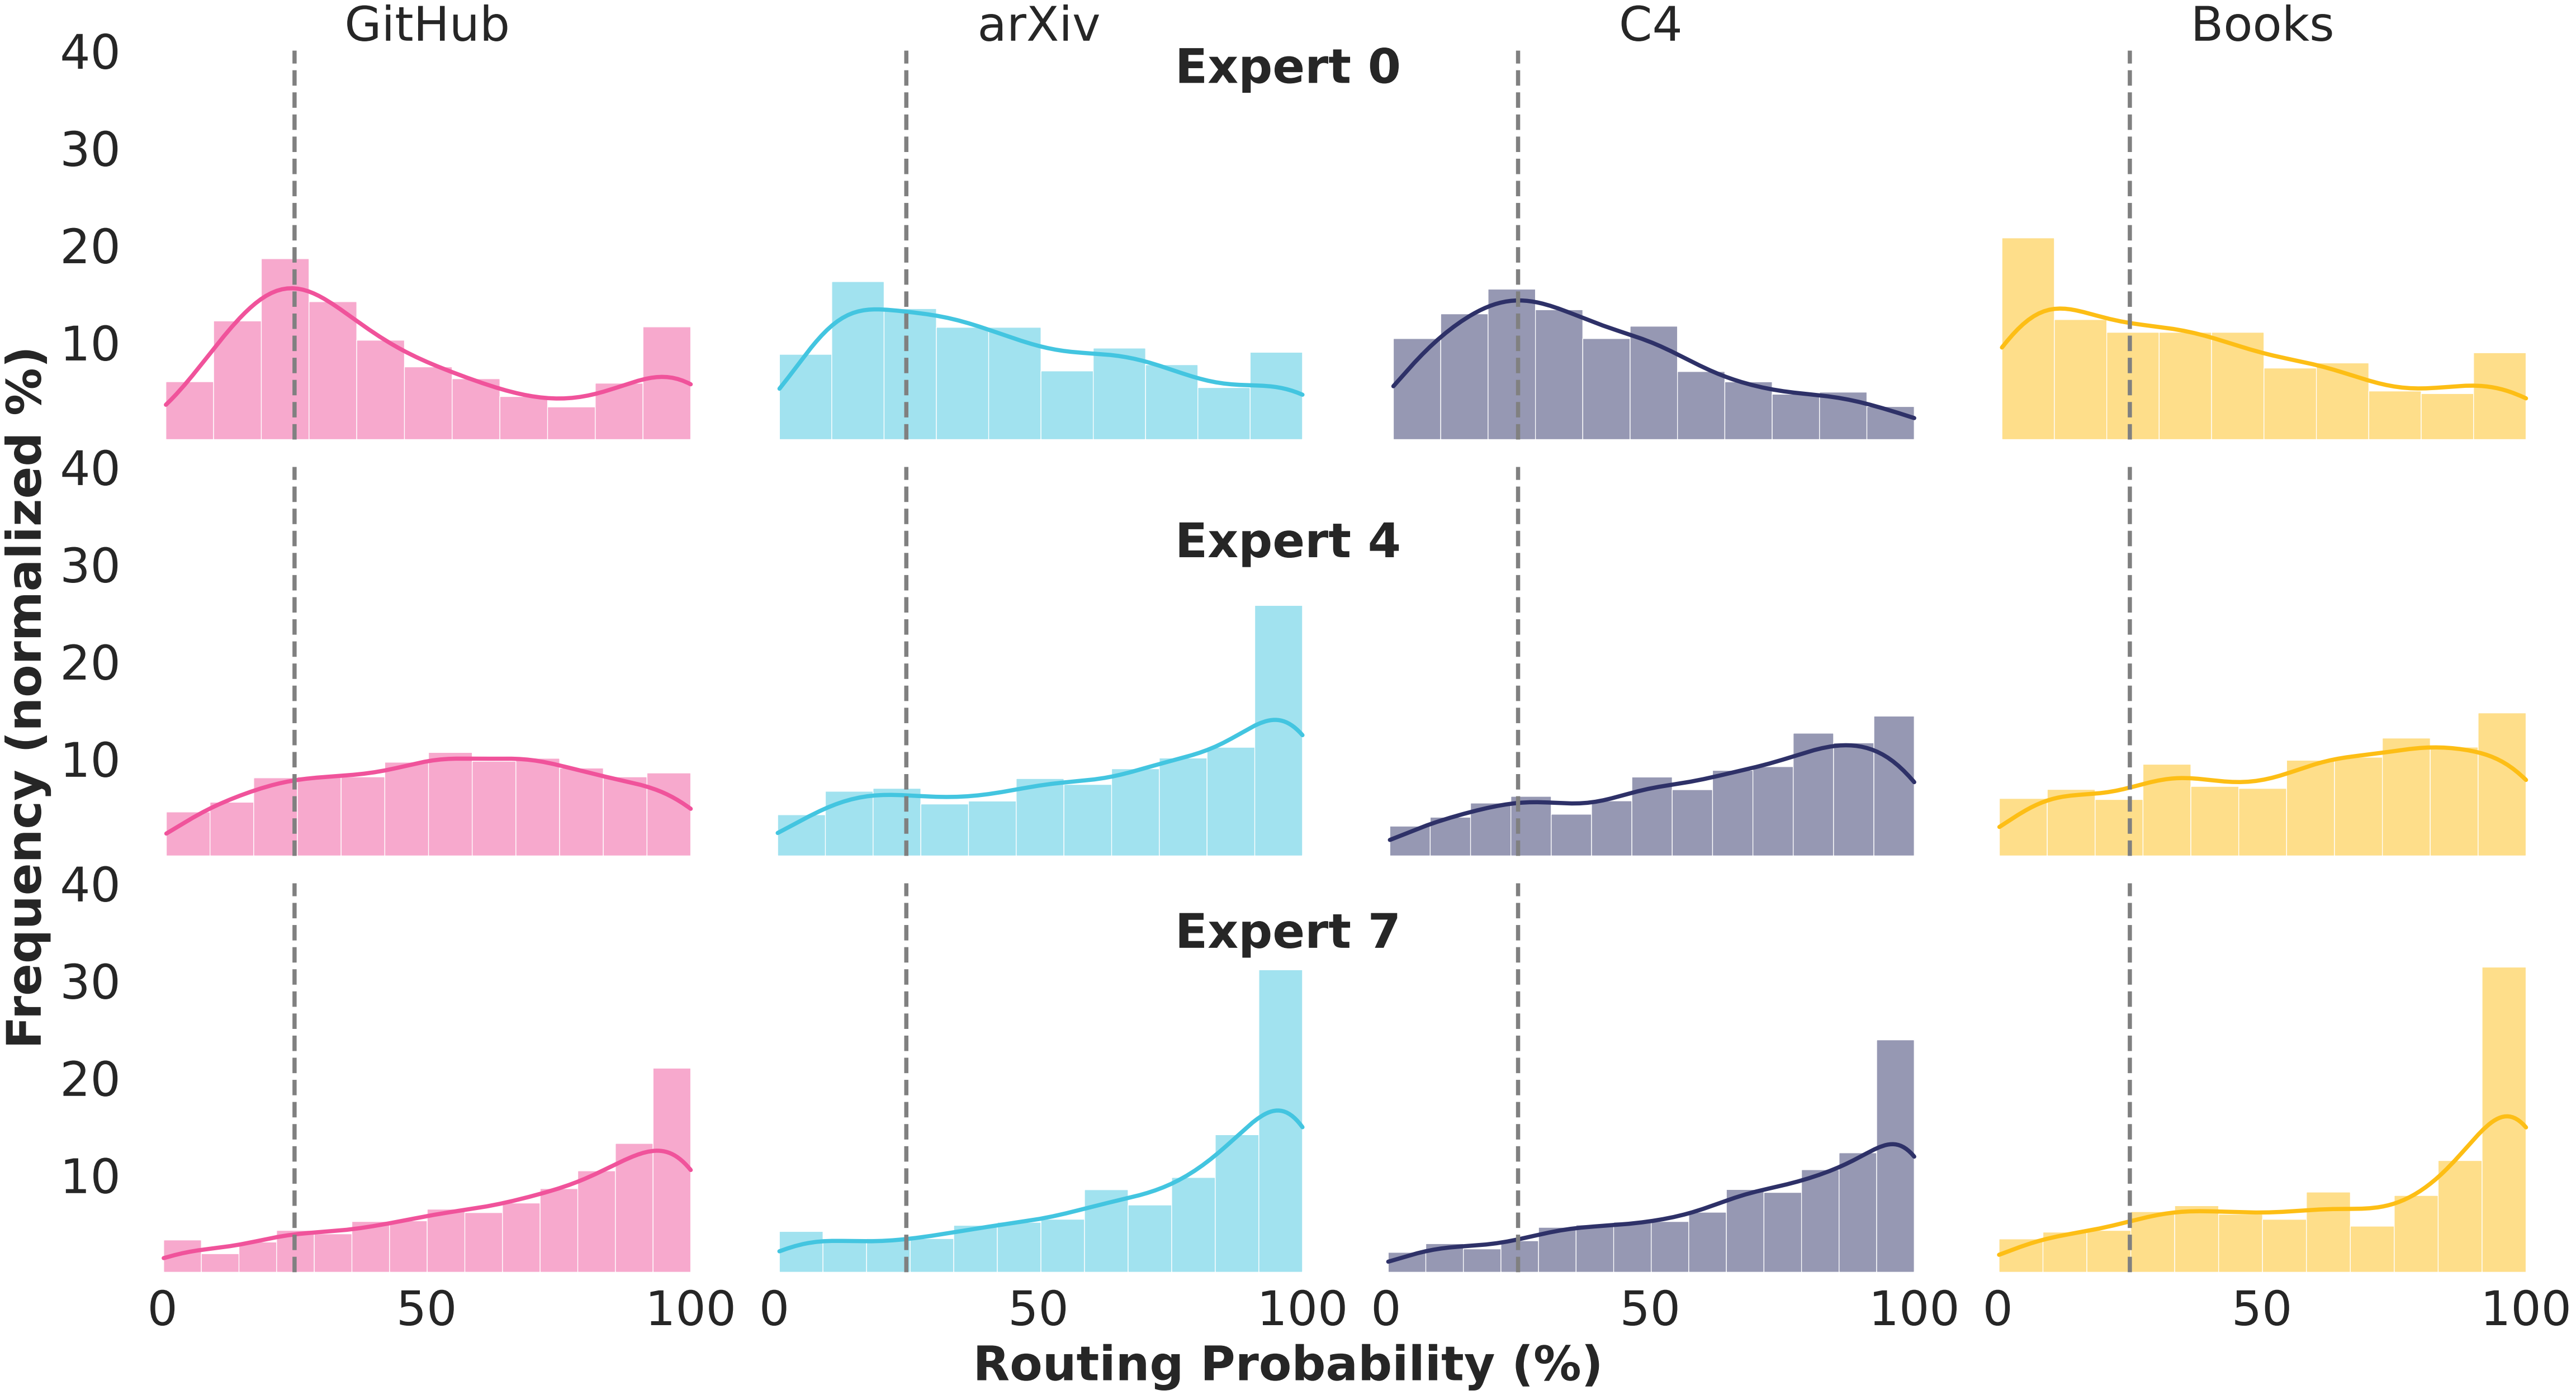

Supplement: supplementary_material [file routing_prob_distribution_mixtral.pdf › RoMA_Code/visuals/figures/routing_prob_distribution_mixtral.pdf]

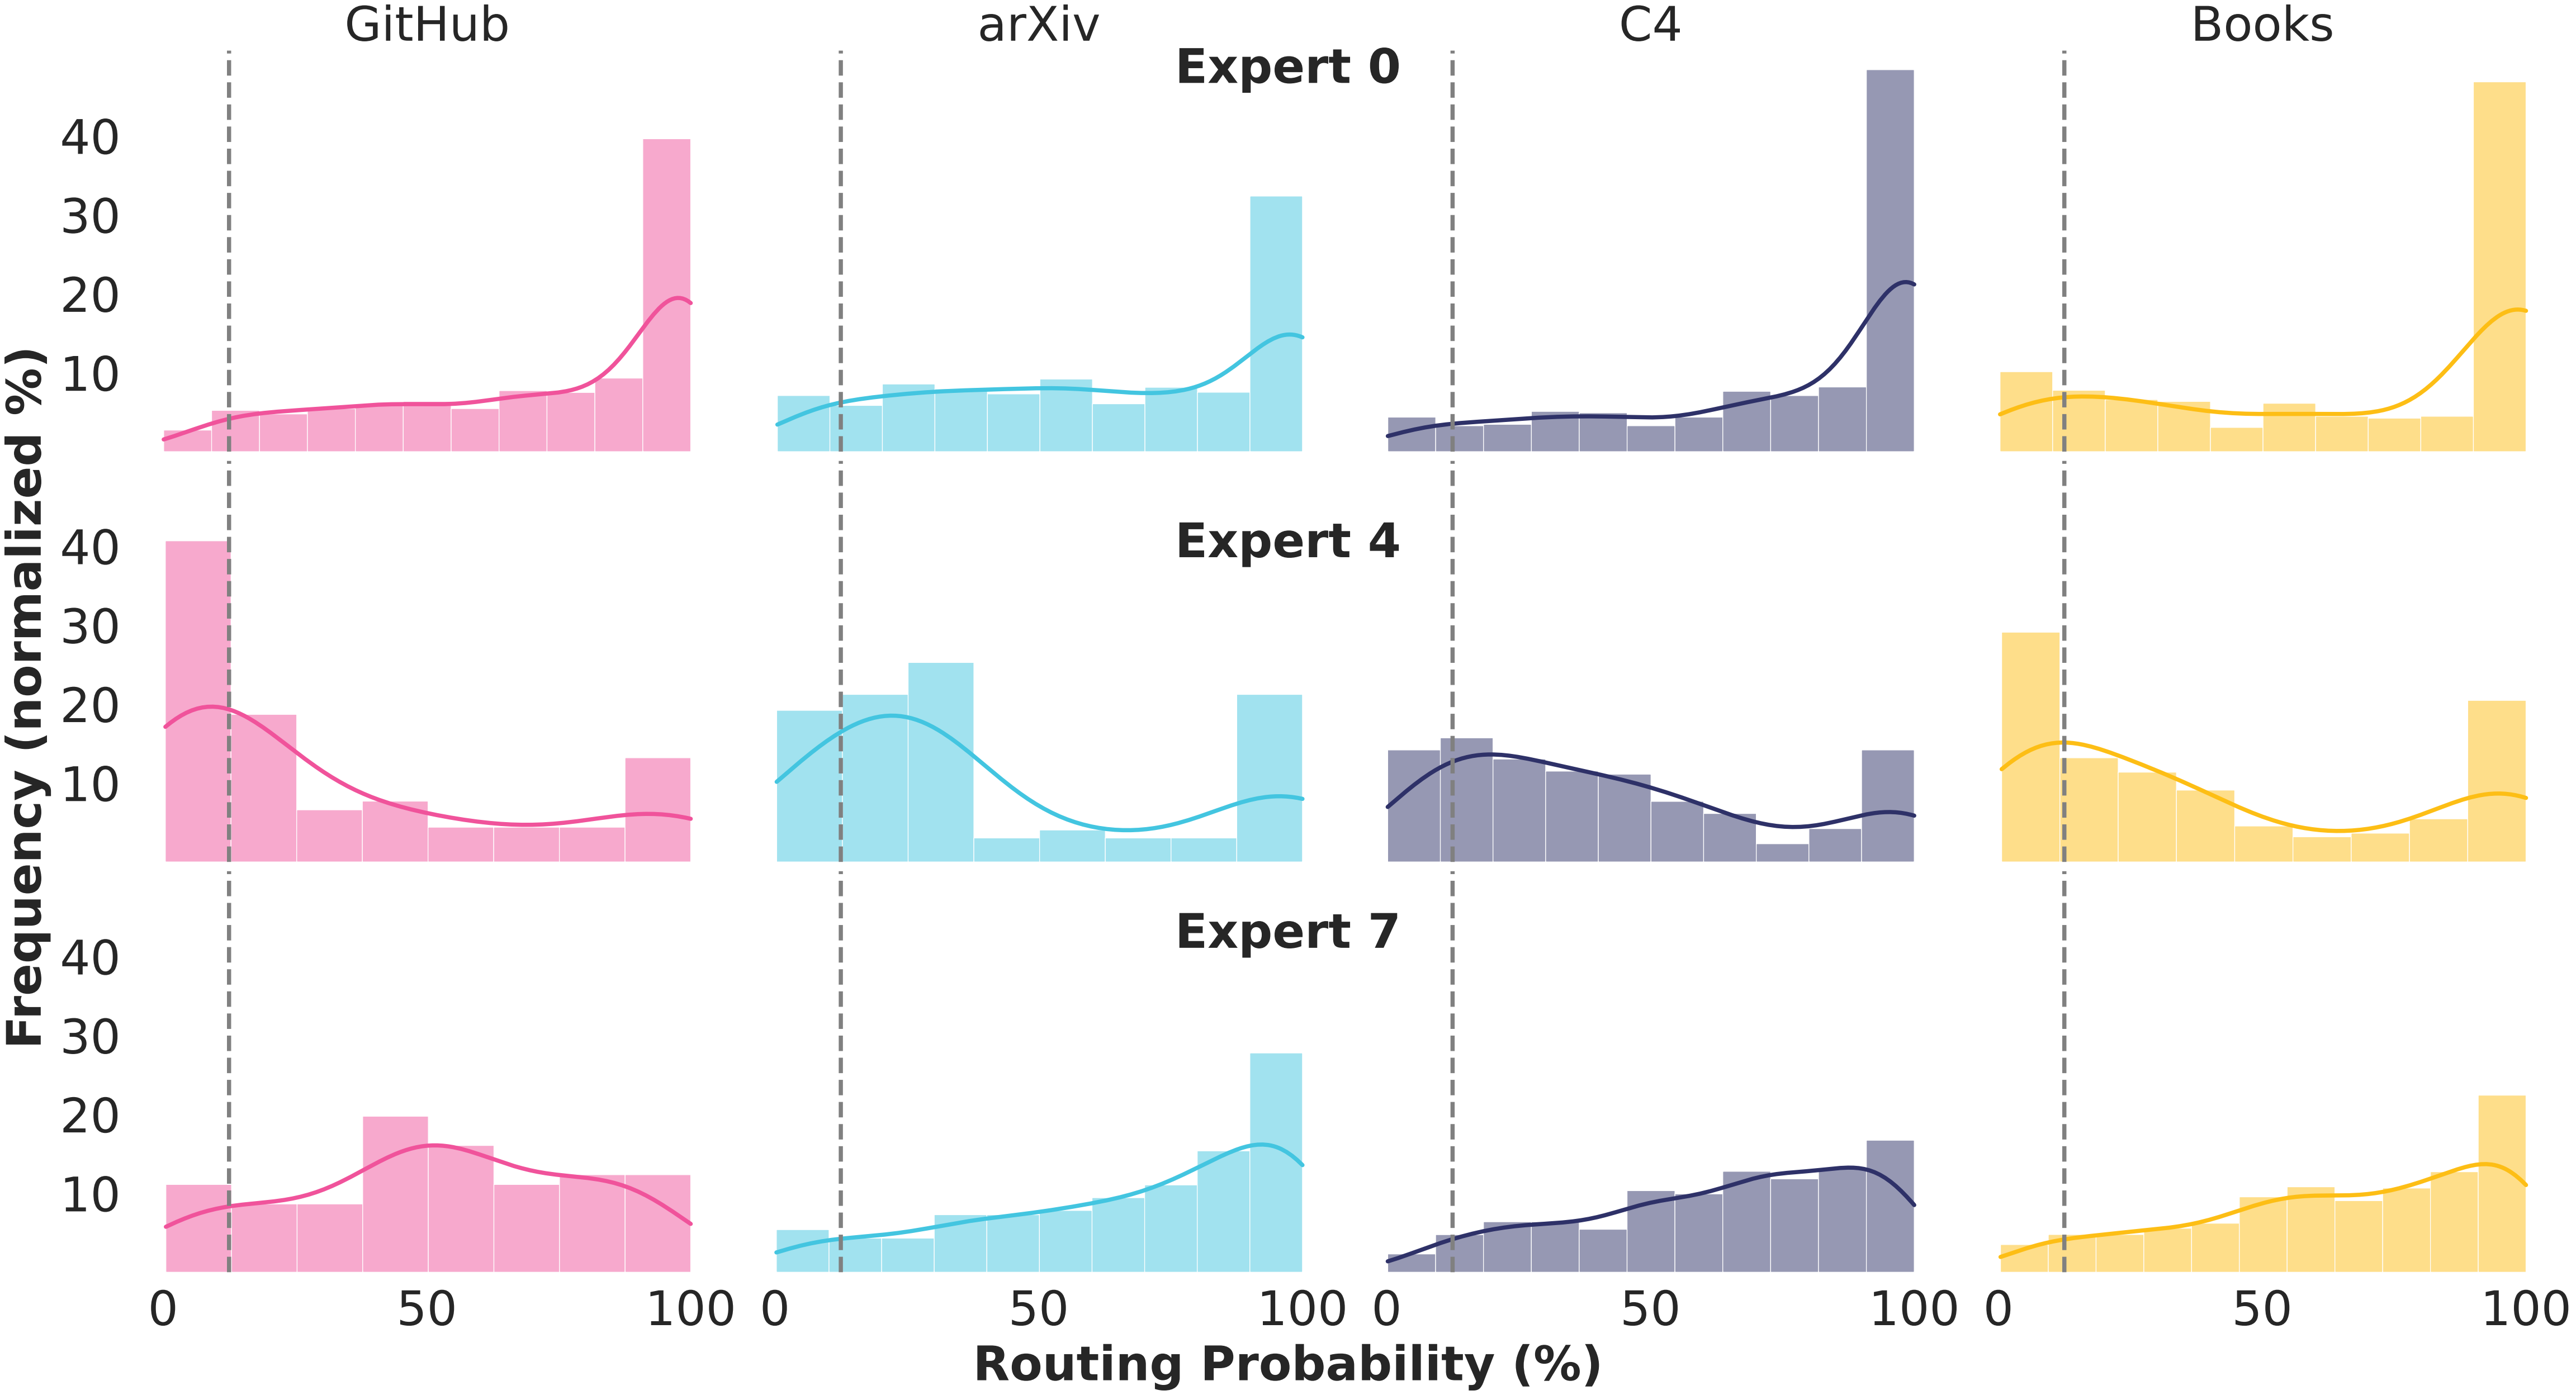

Supplement: supplementary_material [file routing_prob_distribution_olmoe.pdf › RoMA_Code/visuals/figures/routing_prob_distribution_olmoe.pdf]

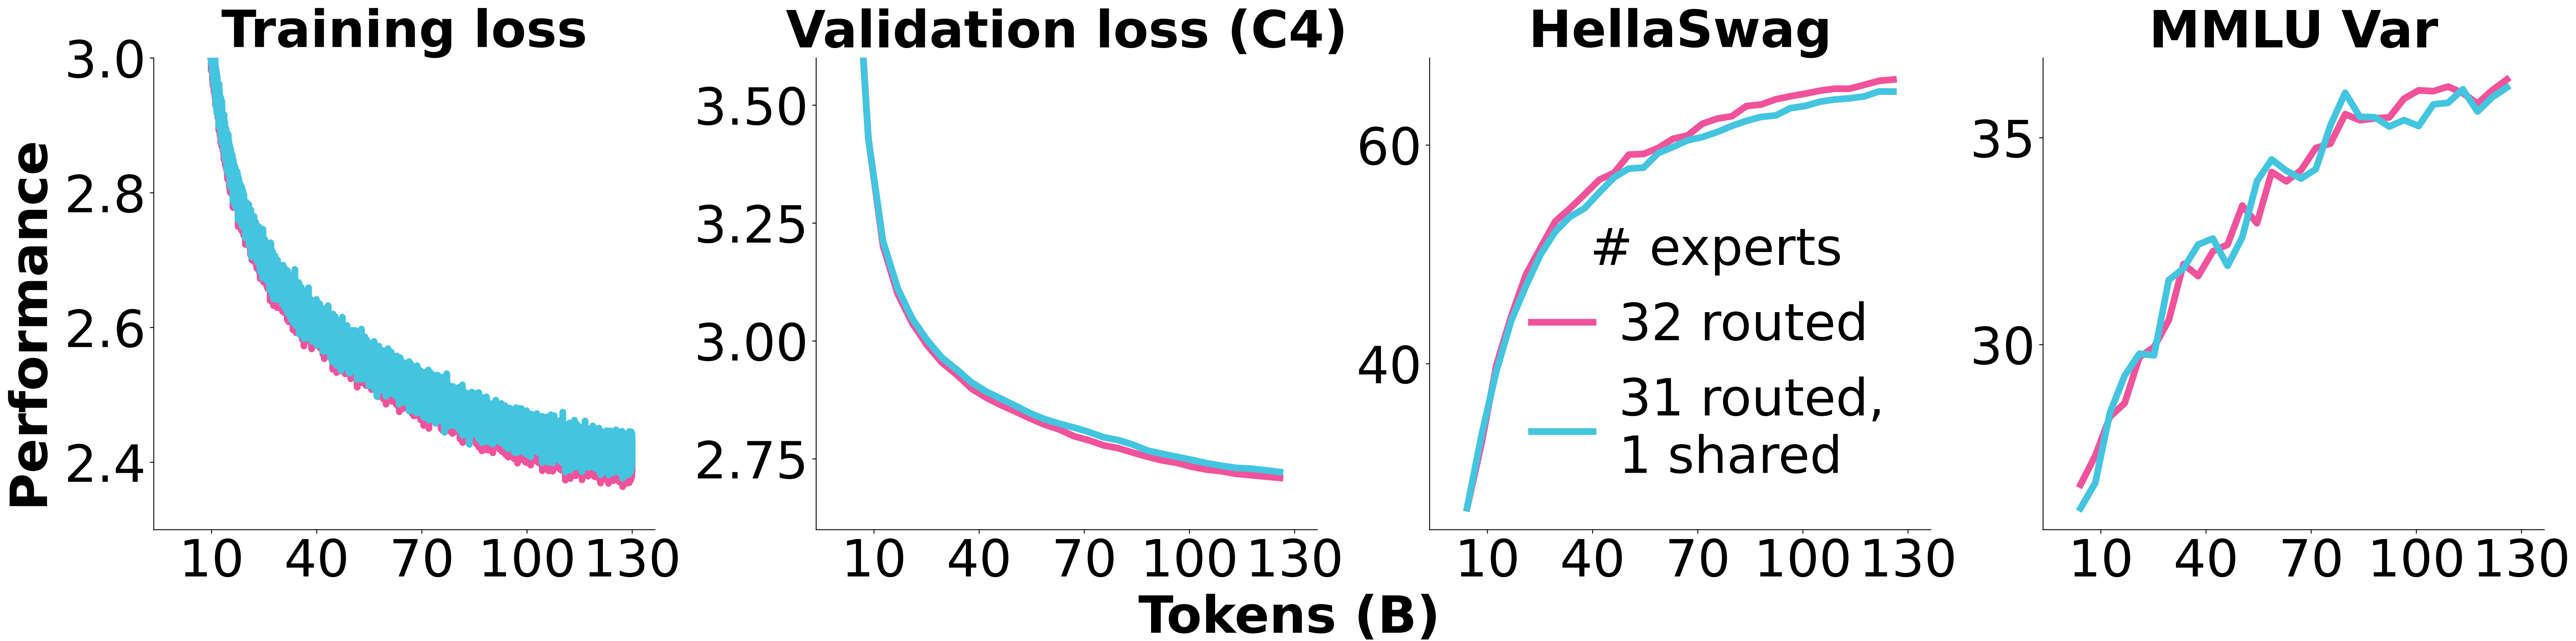

Supplement: supplementary_material [file shared.pdf › RoMA_Code/visuals/figures/shared.pdf]

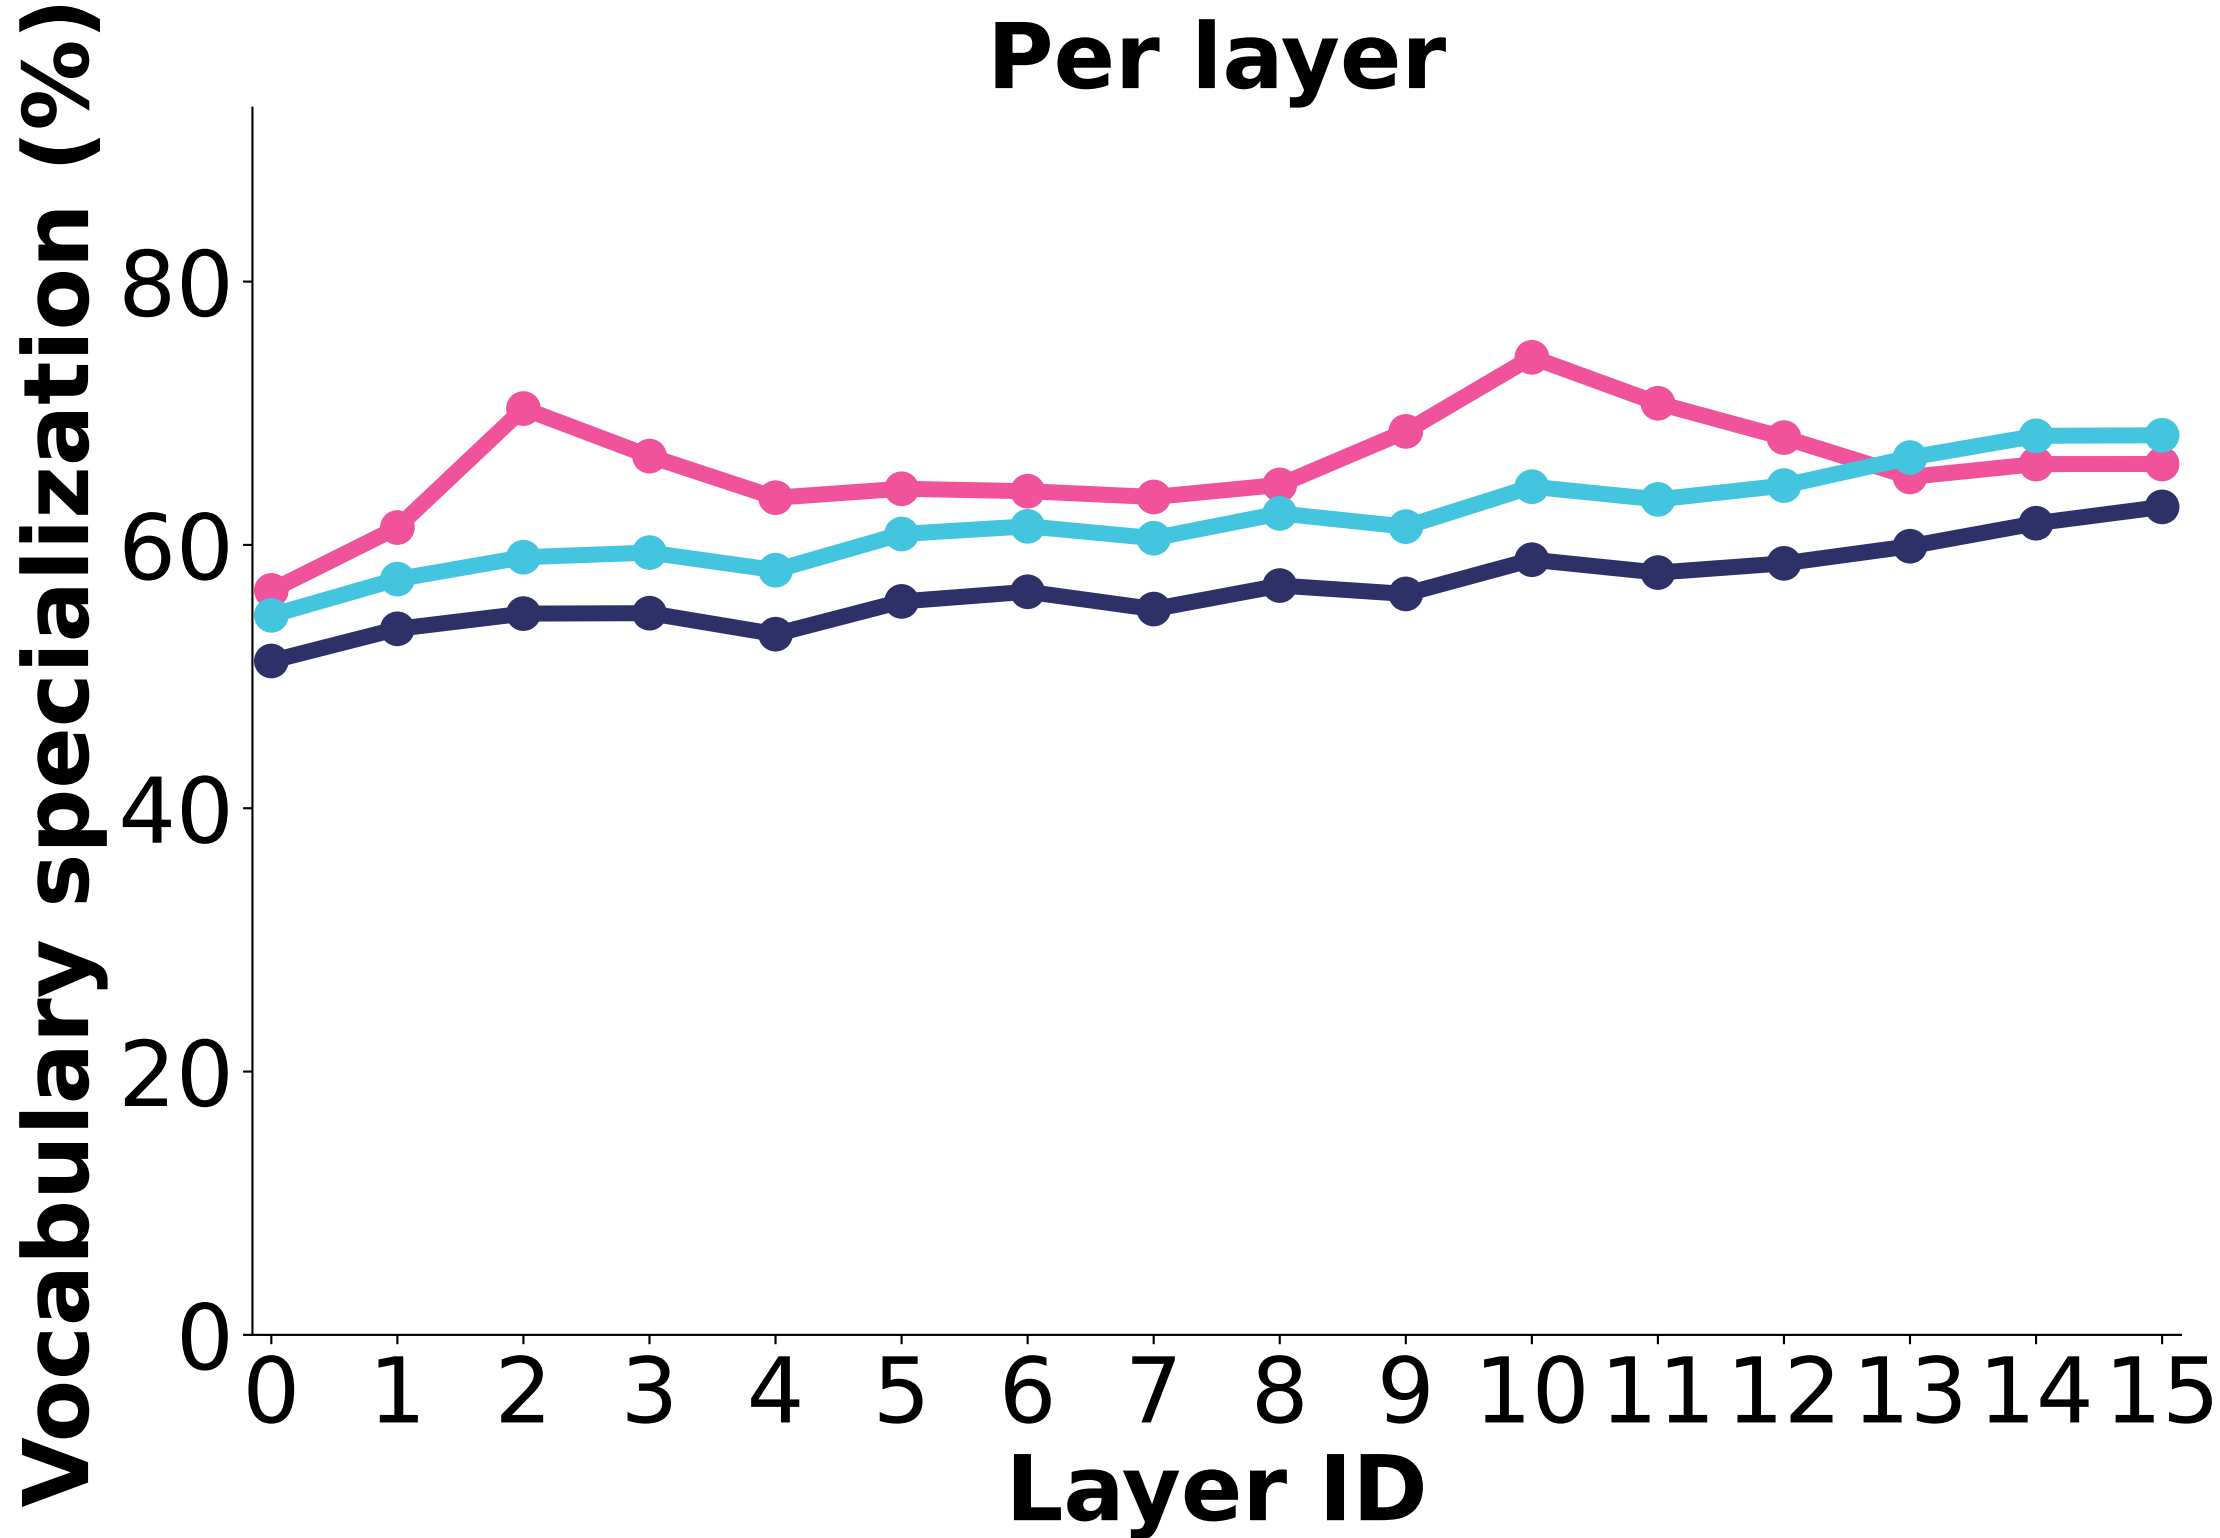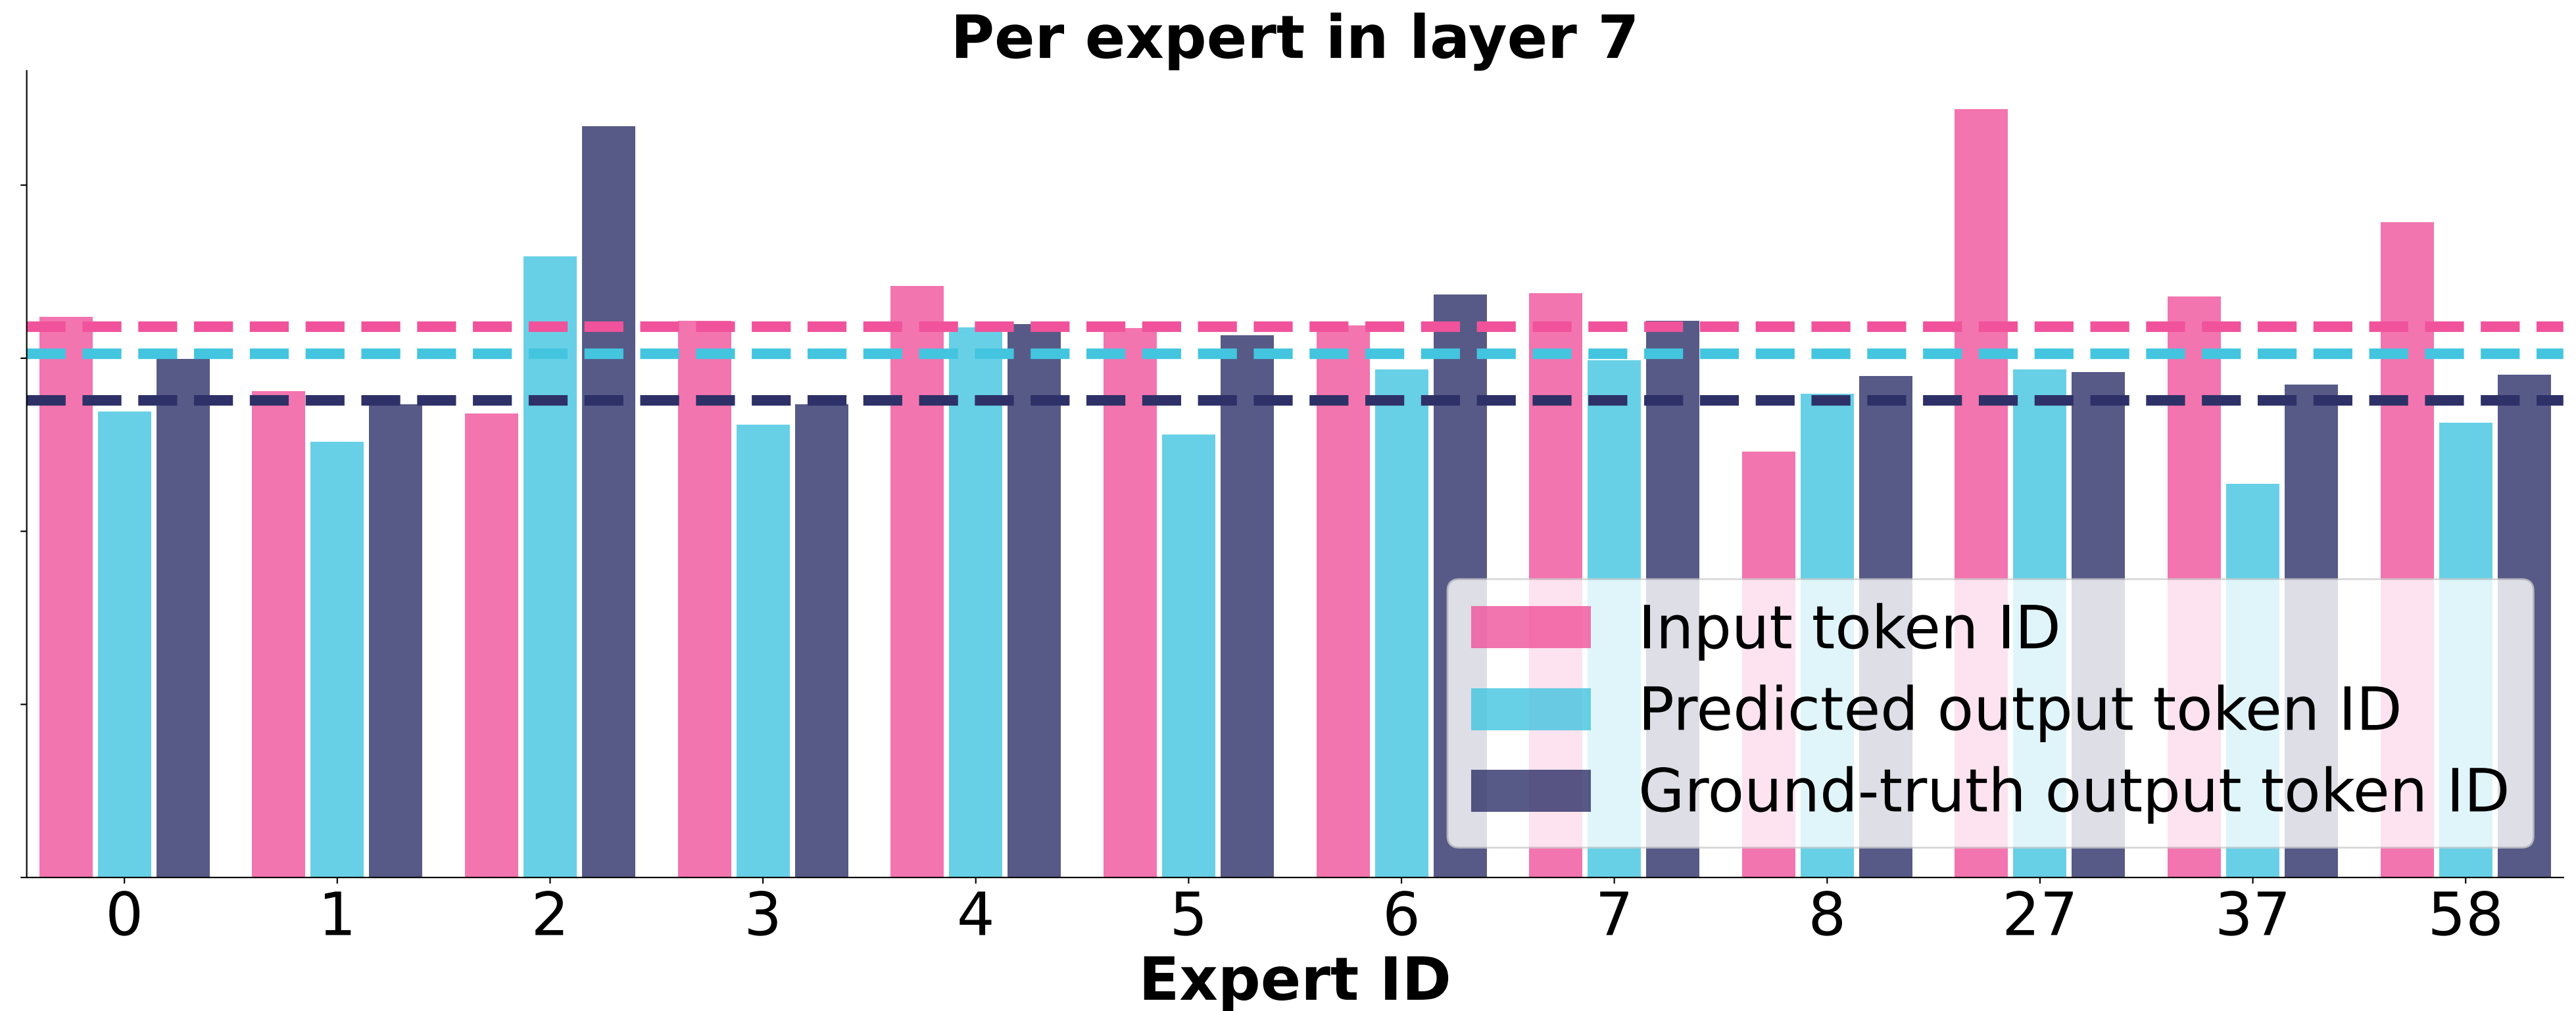

Supplement: supplementary_material [file token_specialization_top1_olmoe.pdf › RoMA_Code/visuals/figures/token_specialization_top1_olmoe.pdf]

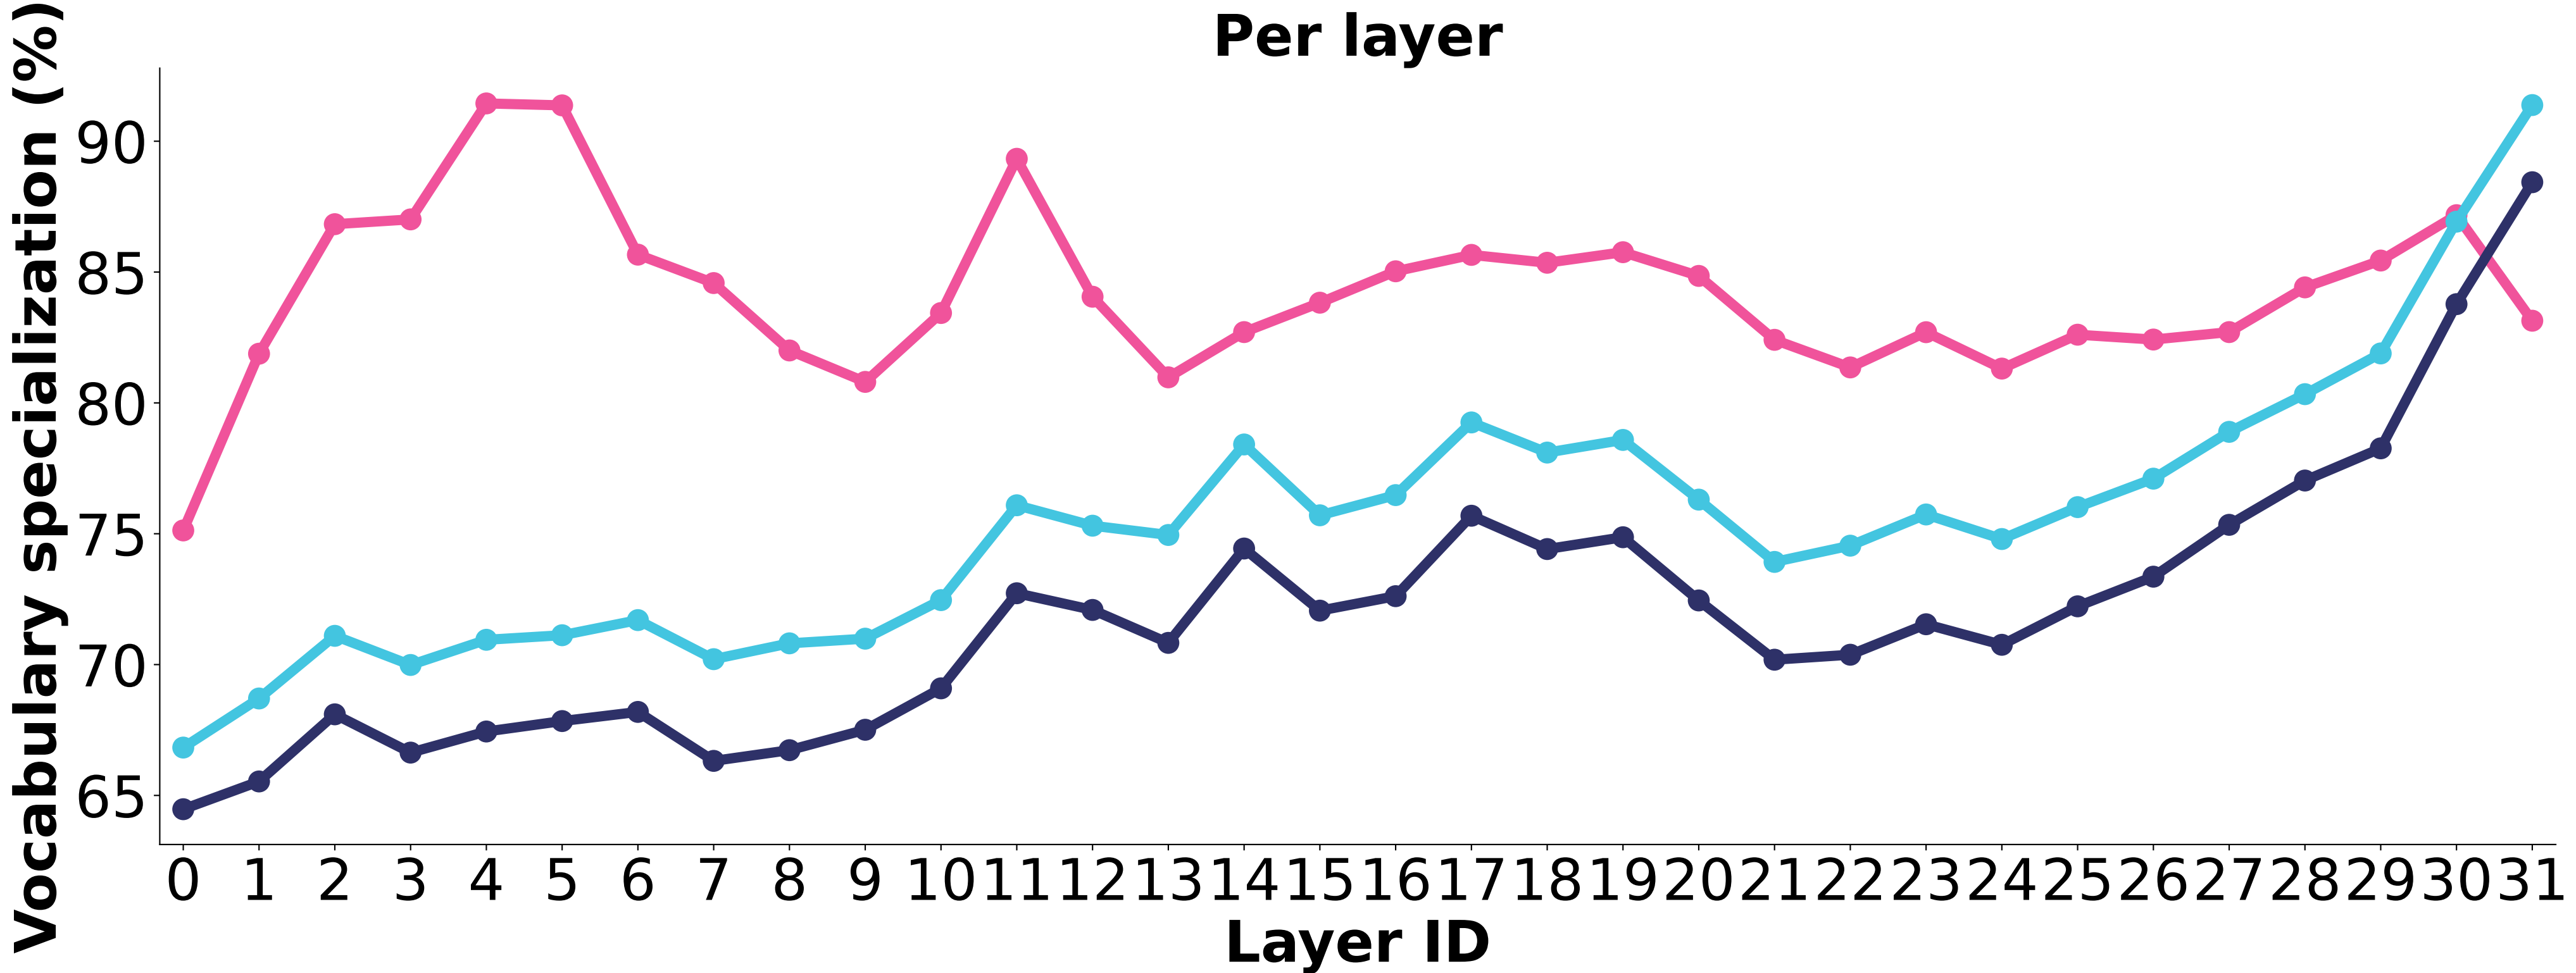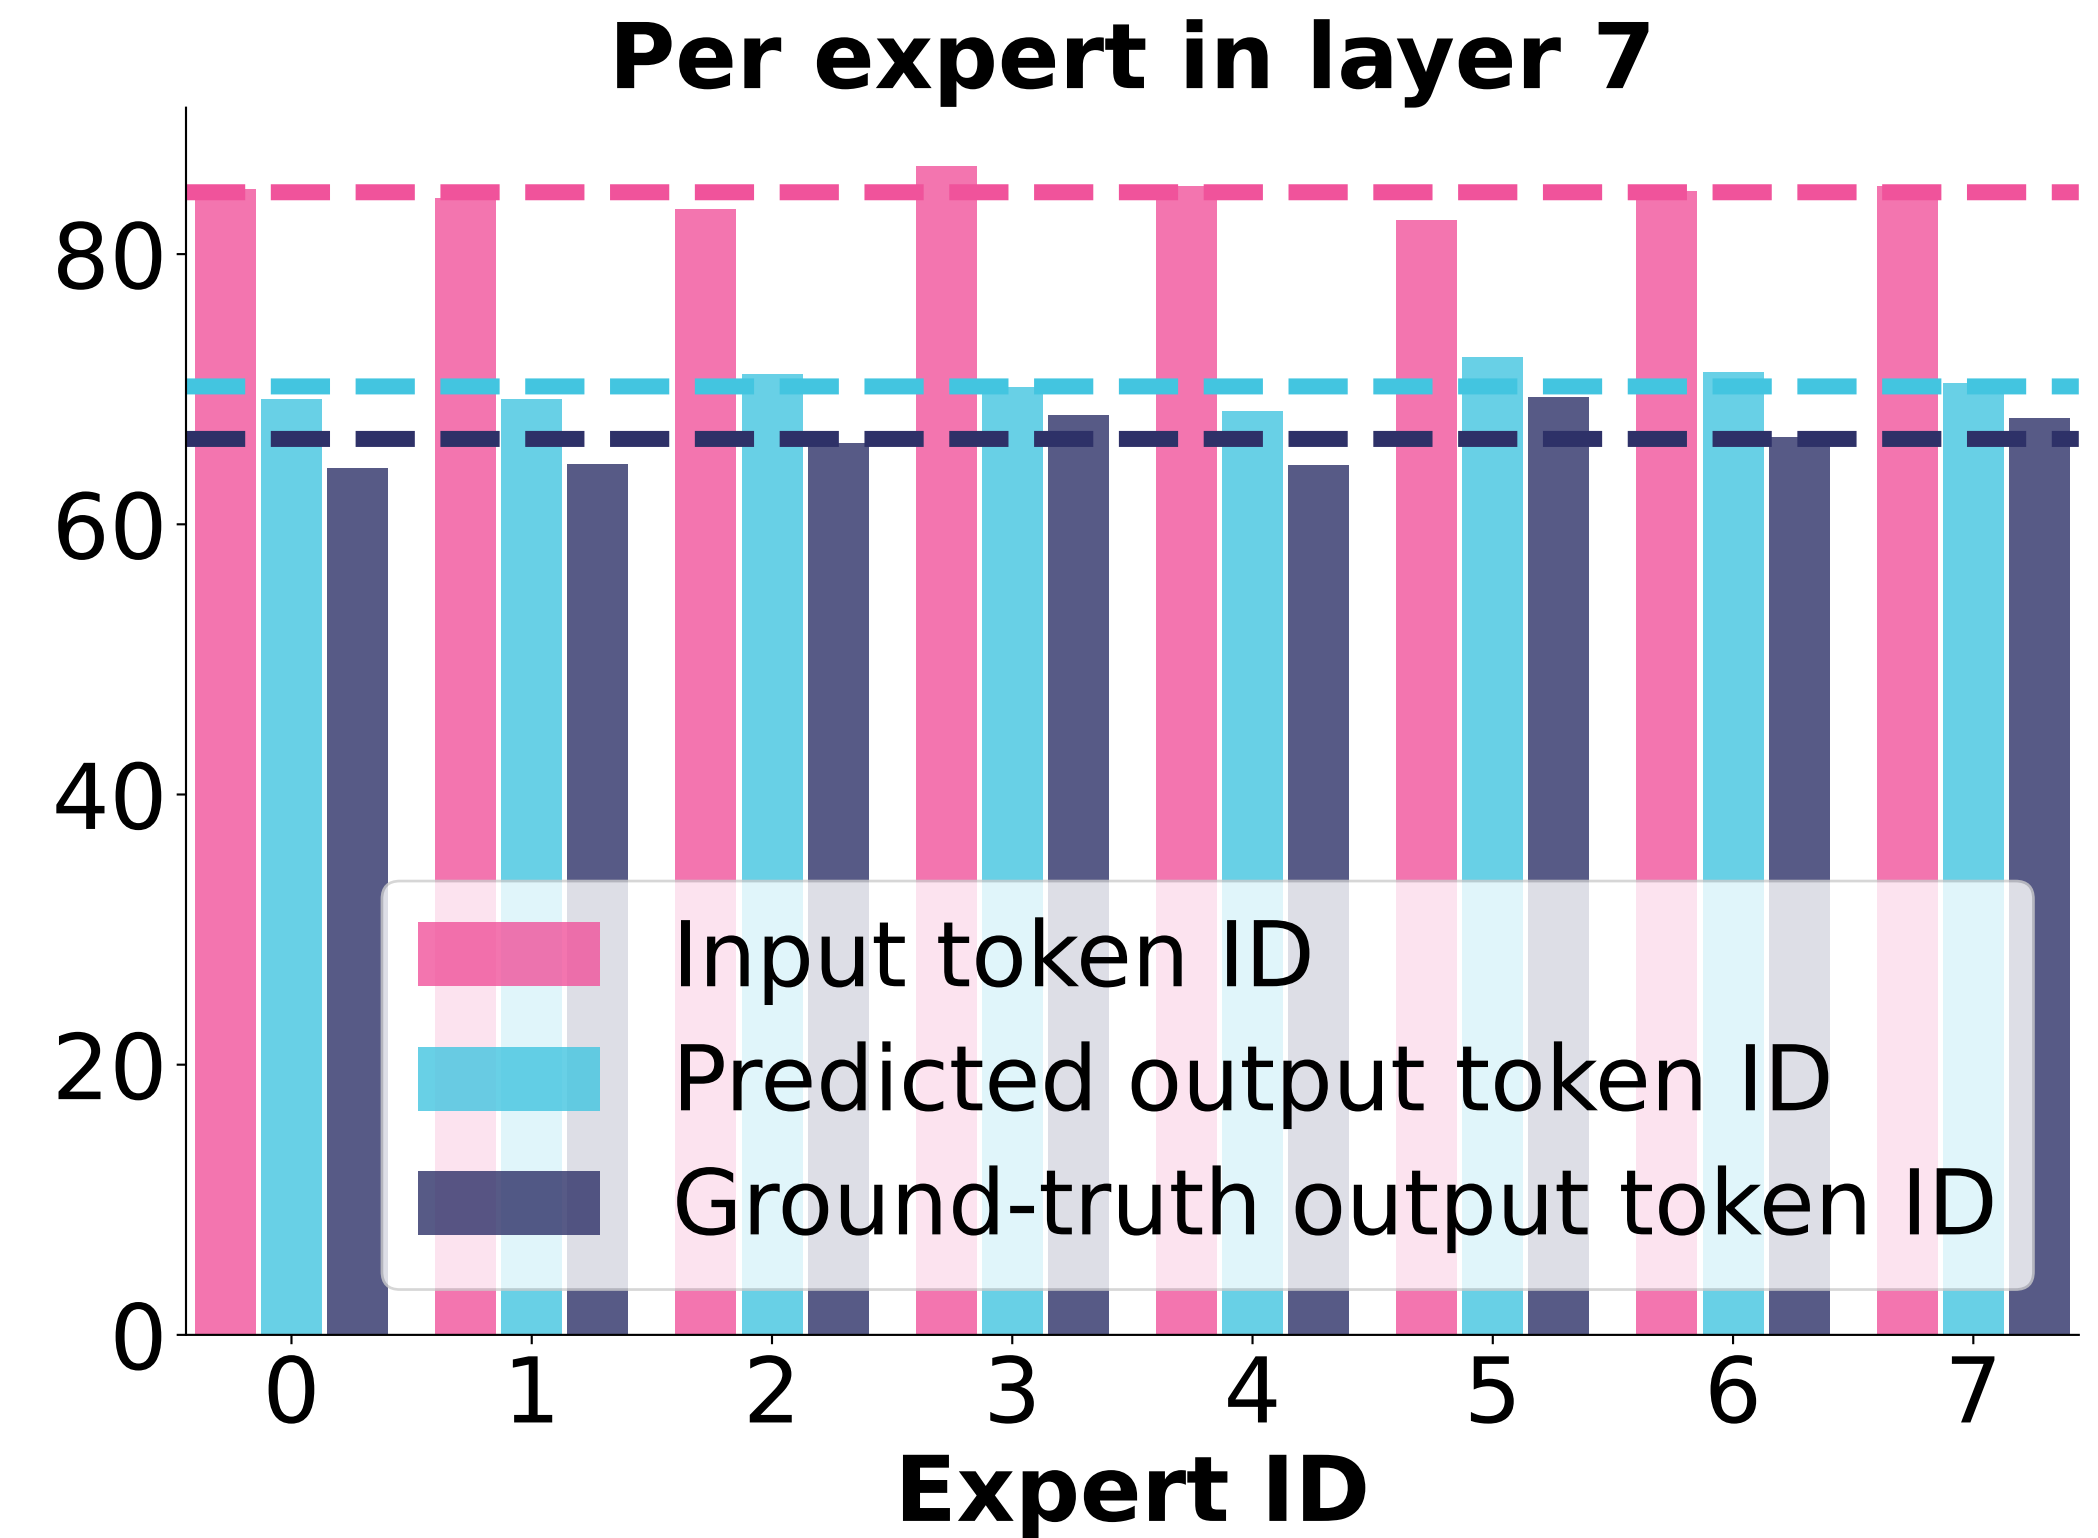

Supplement: supplementary_material [file token_specialization_top2_mixtral.pdf › RoMA_Code/visuals/figures/token_specialization_top2_mixtral.pdf]

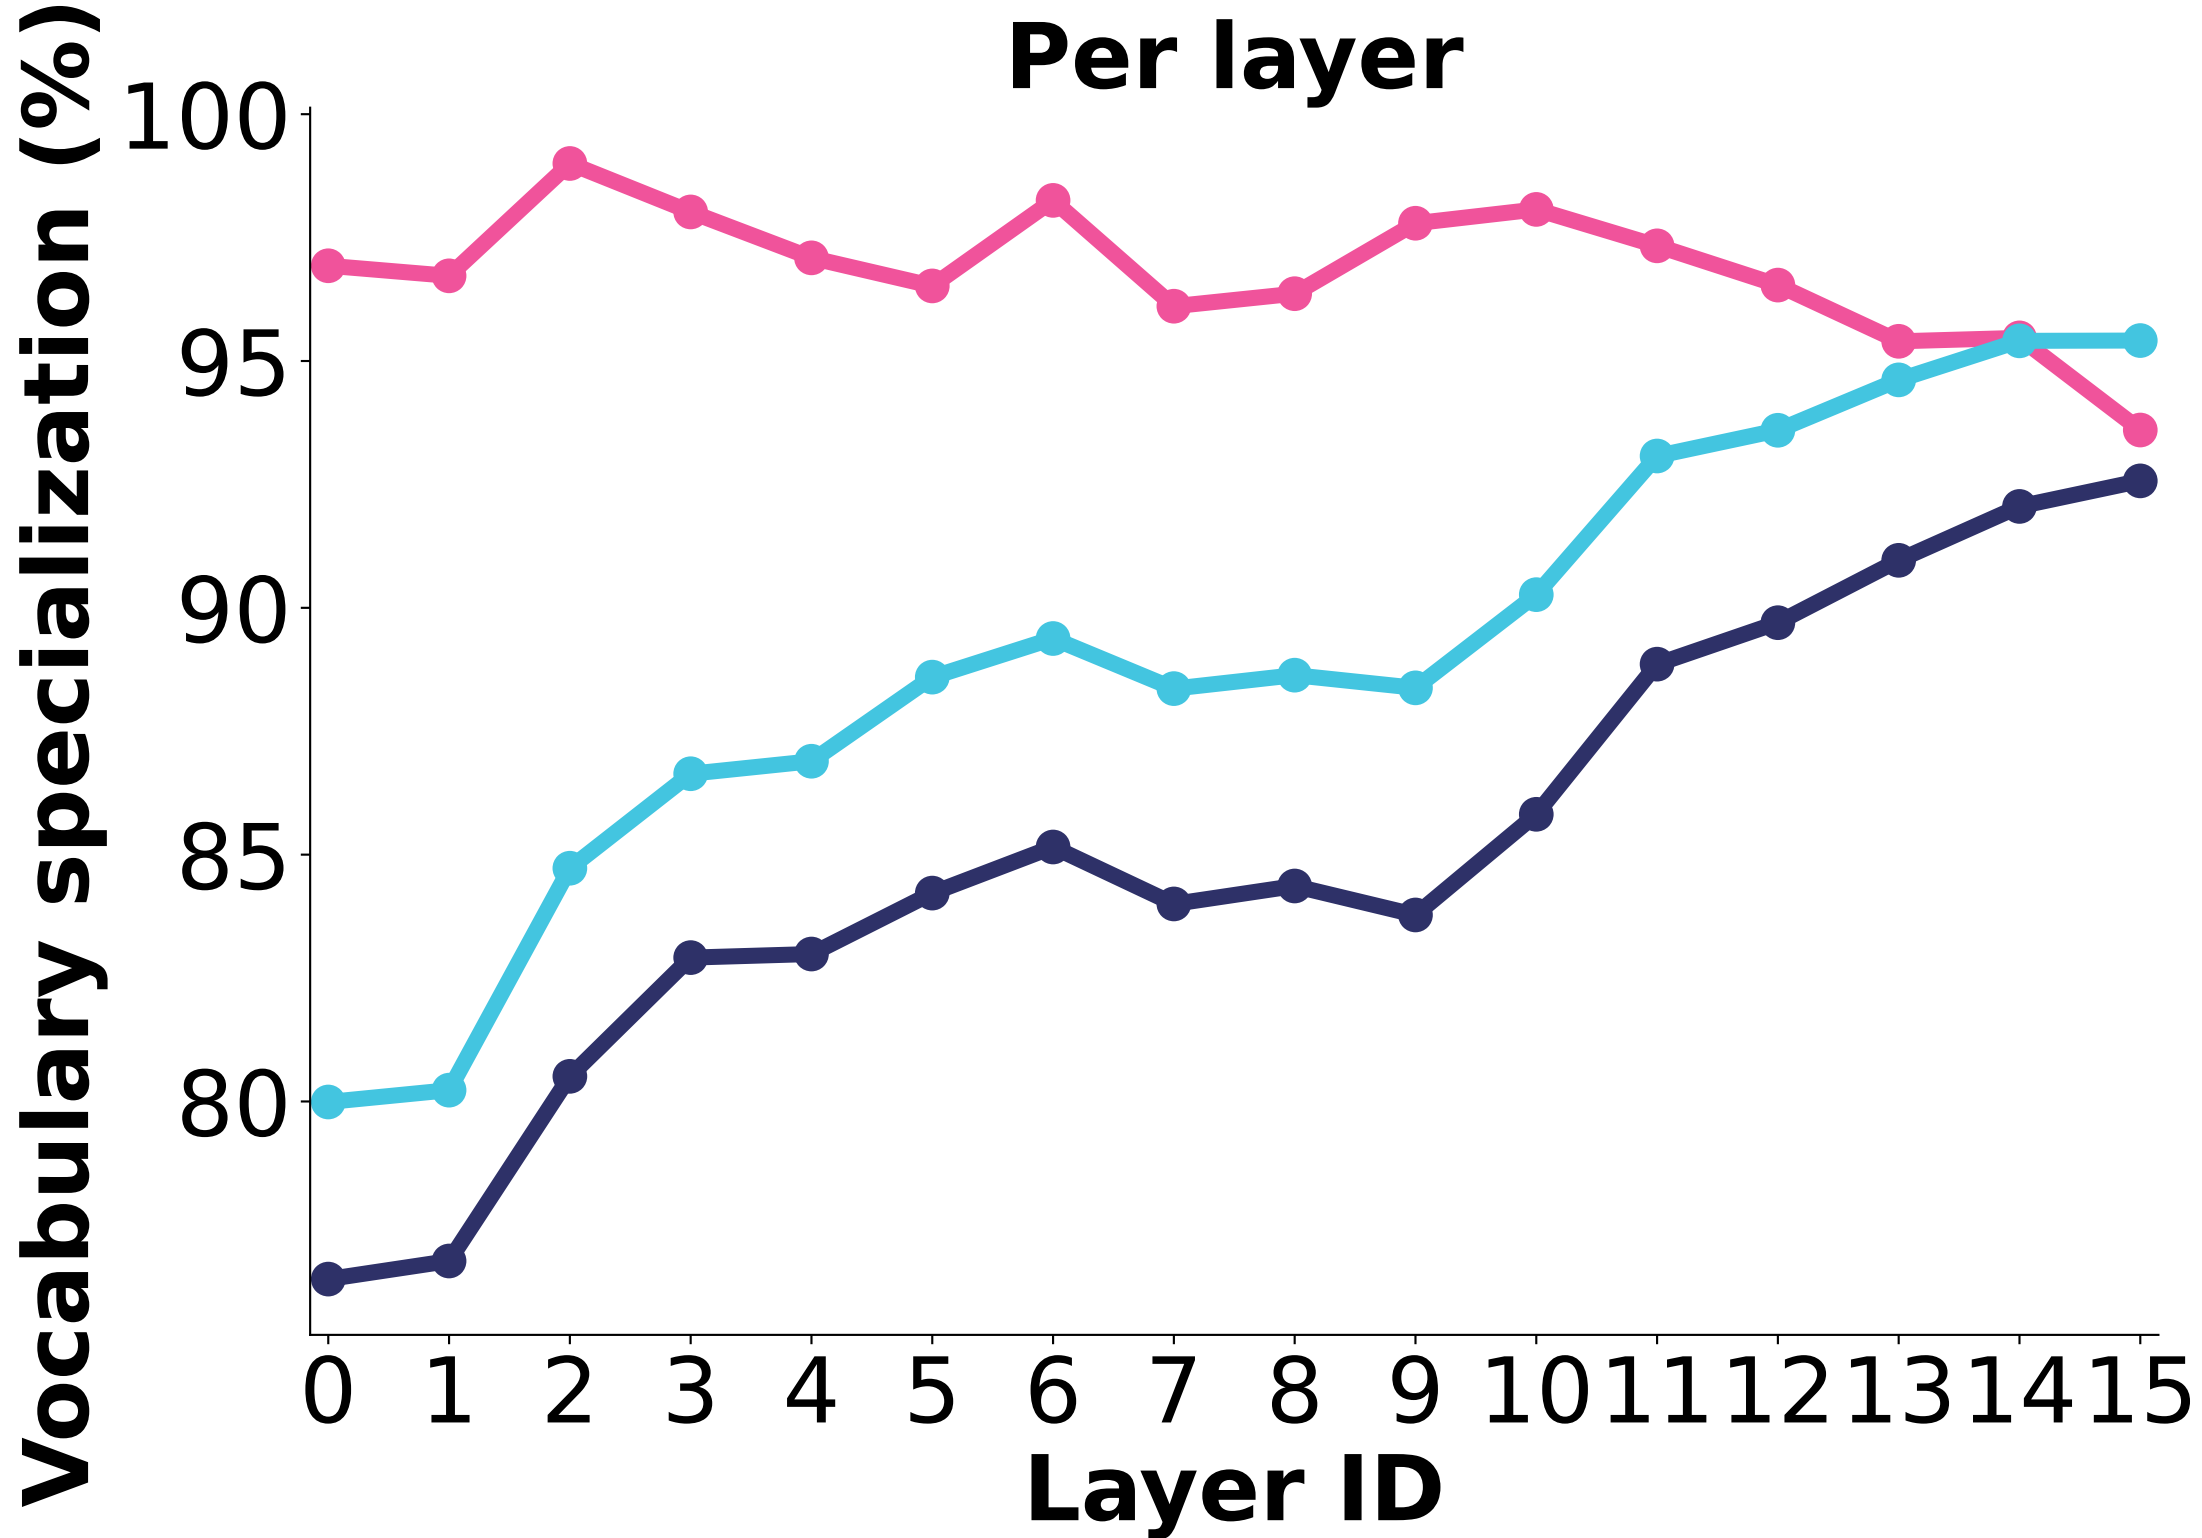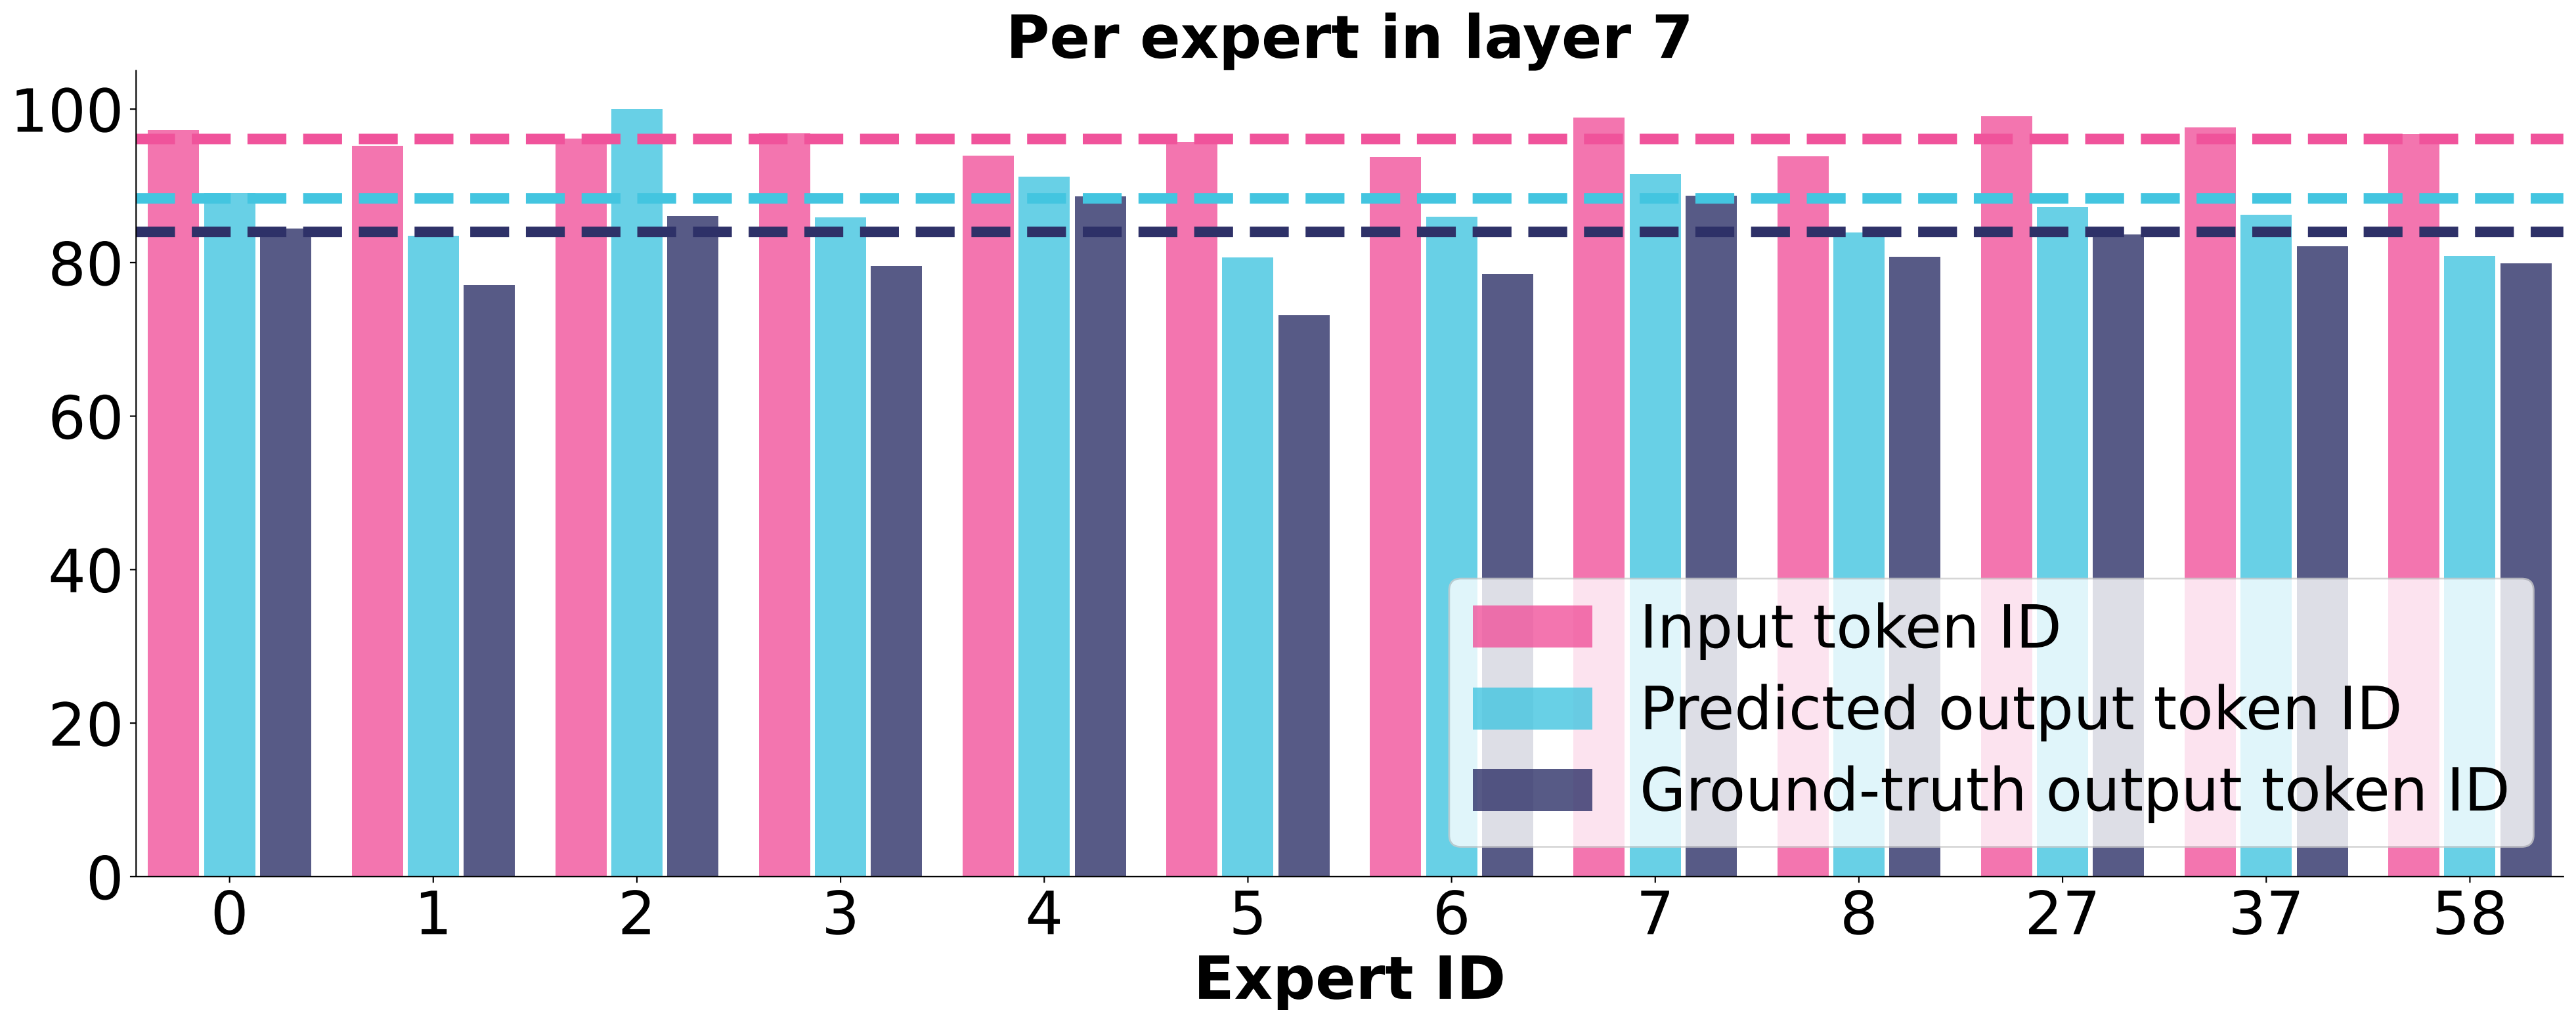

Supplement: supplementary_material [file token_specialization_top8_olmoe.pdf › RoMA_Code/visuals/figures/token_specialization_top8_olmoe.pdf]

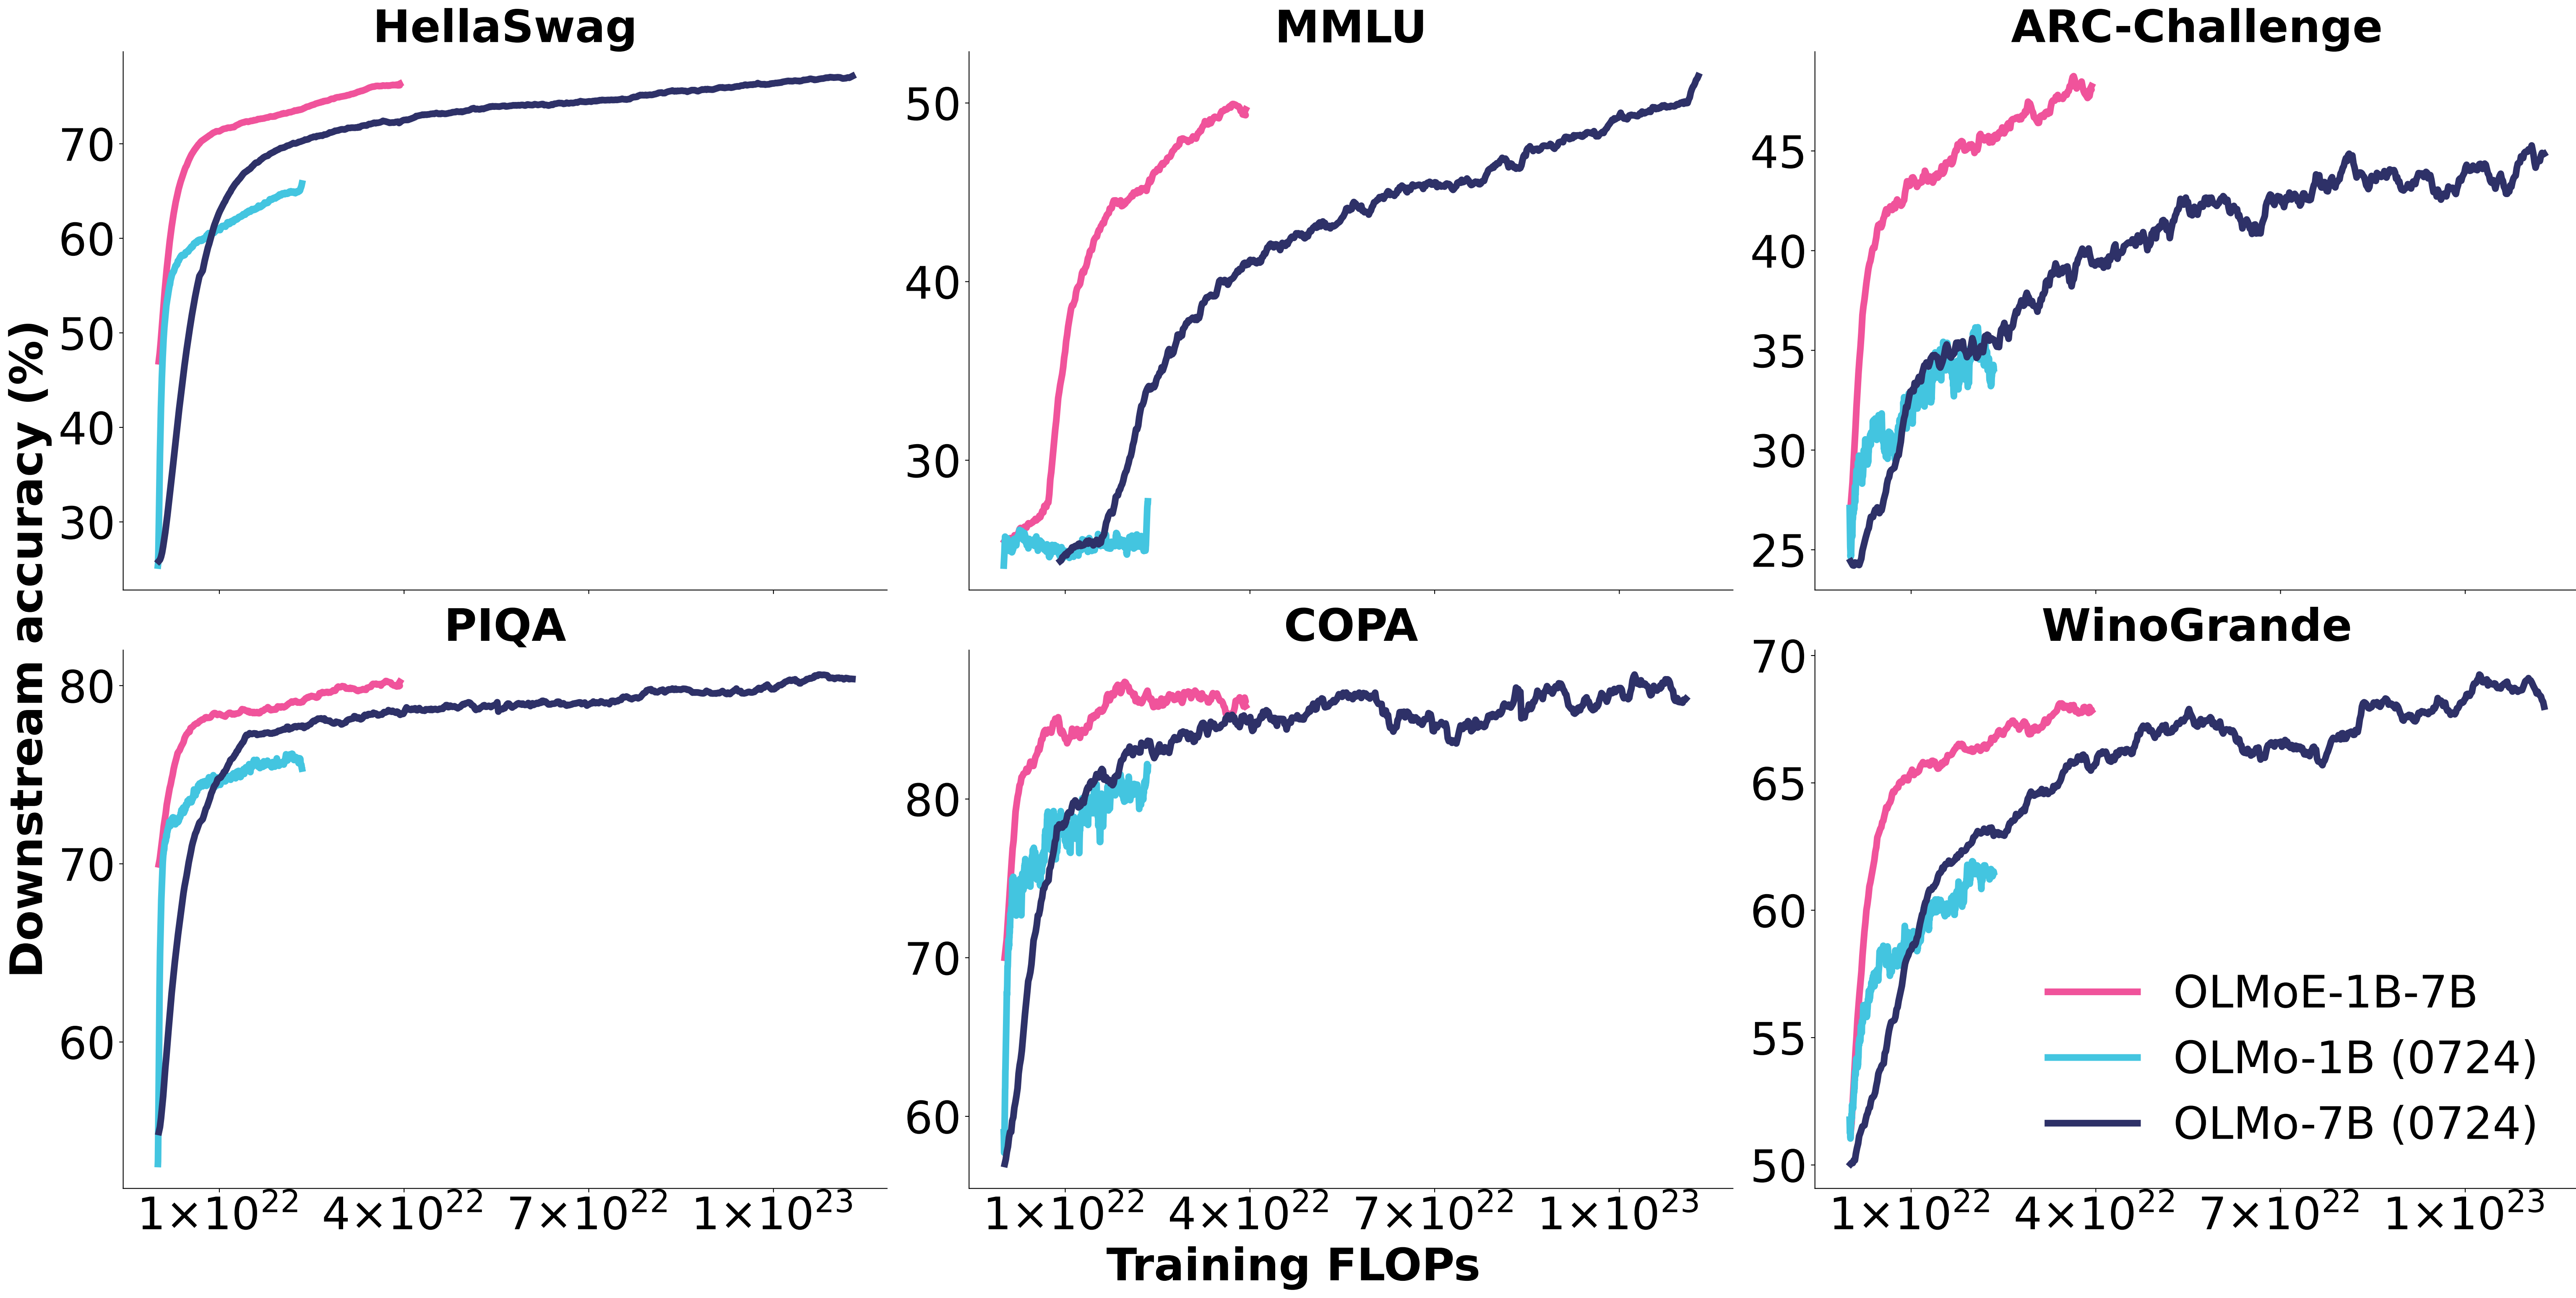

Supplement: supplementary_material [file trainingevalflops.pdf › RoMA_Code/visuals/figures/trainingevalflops.pdf]

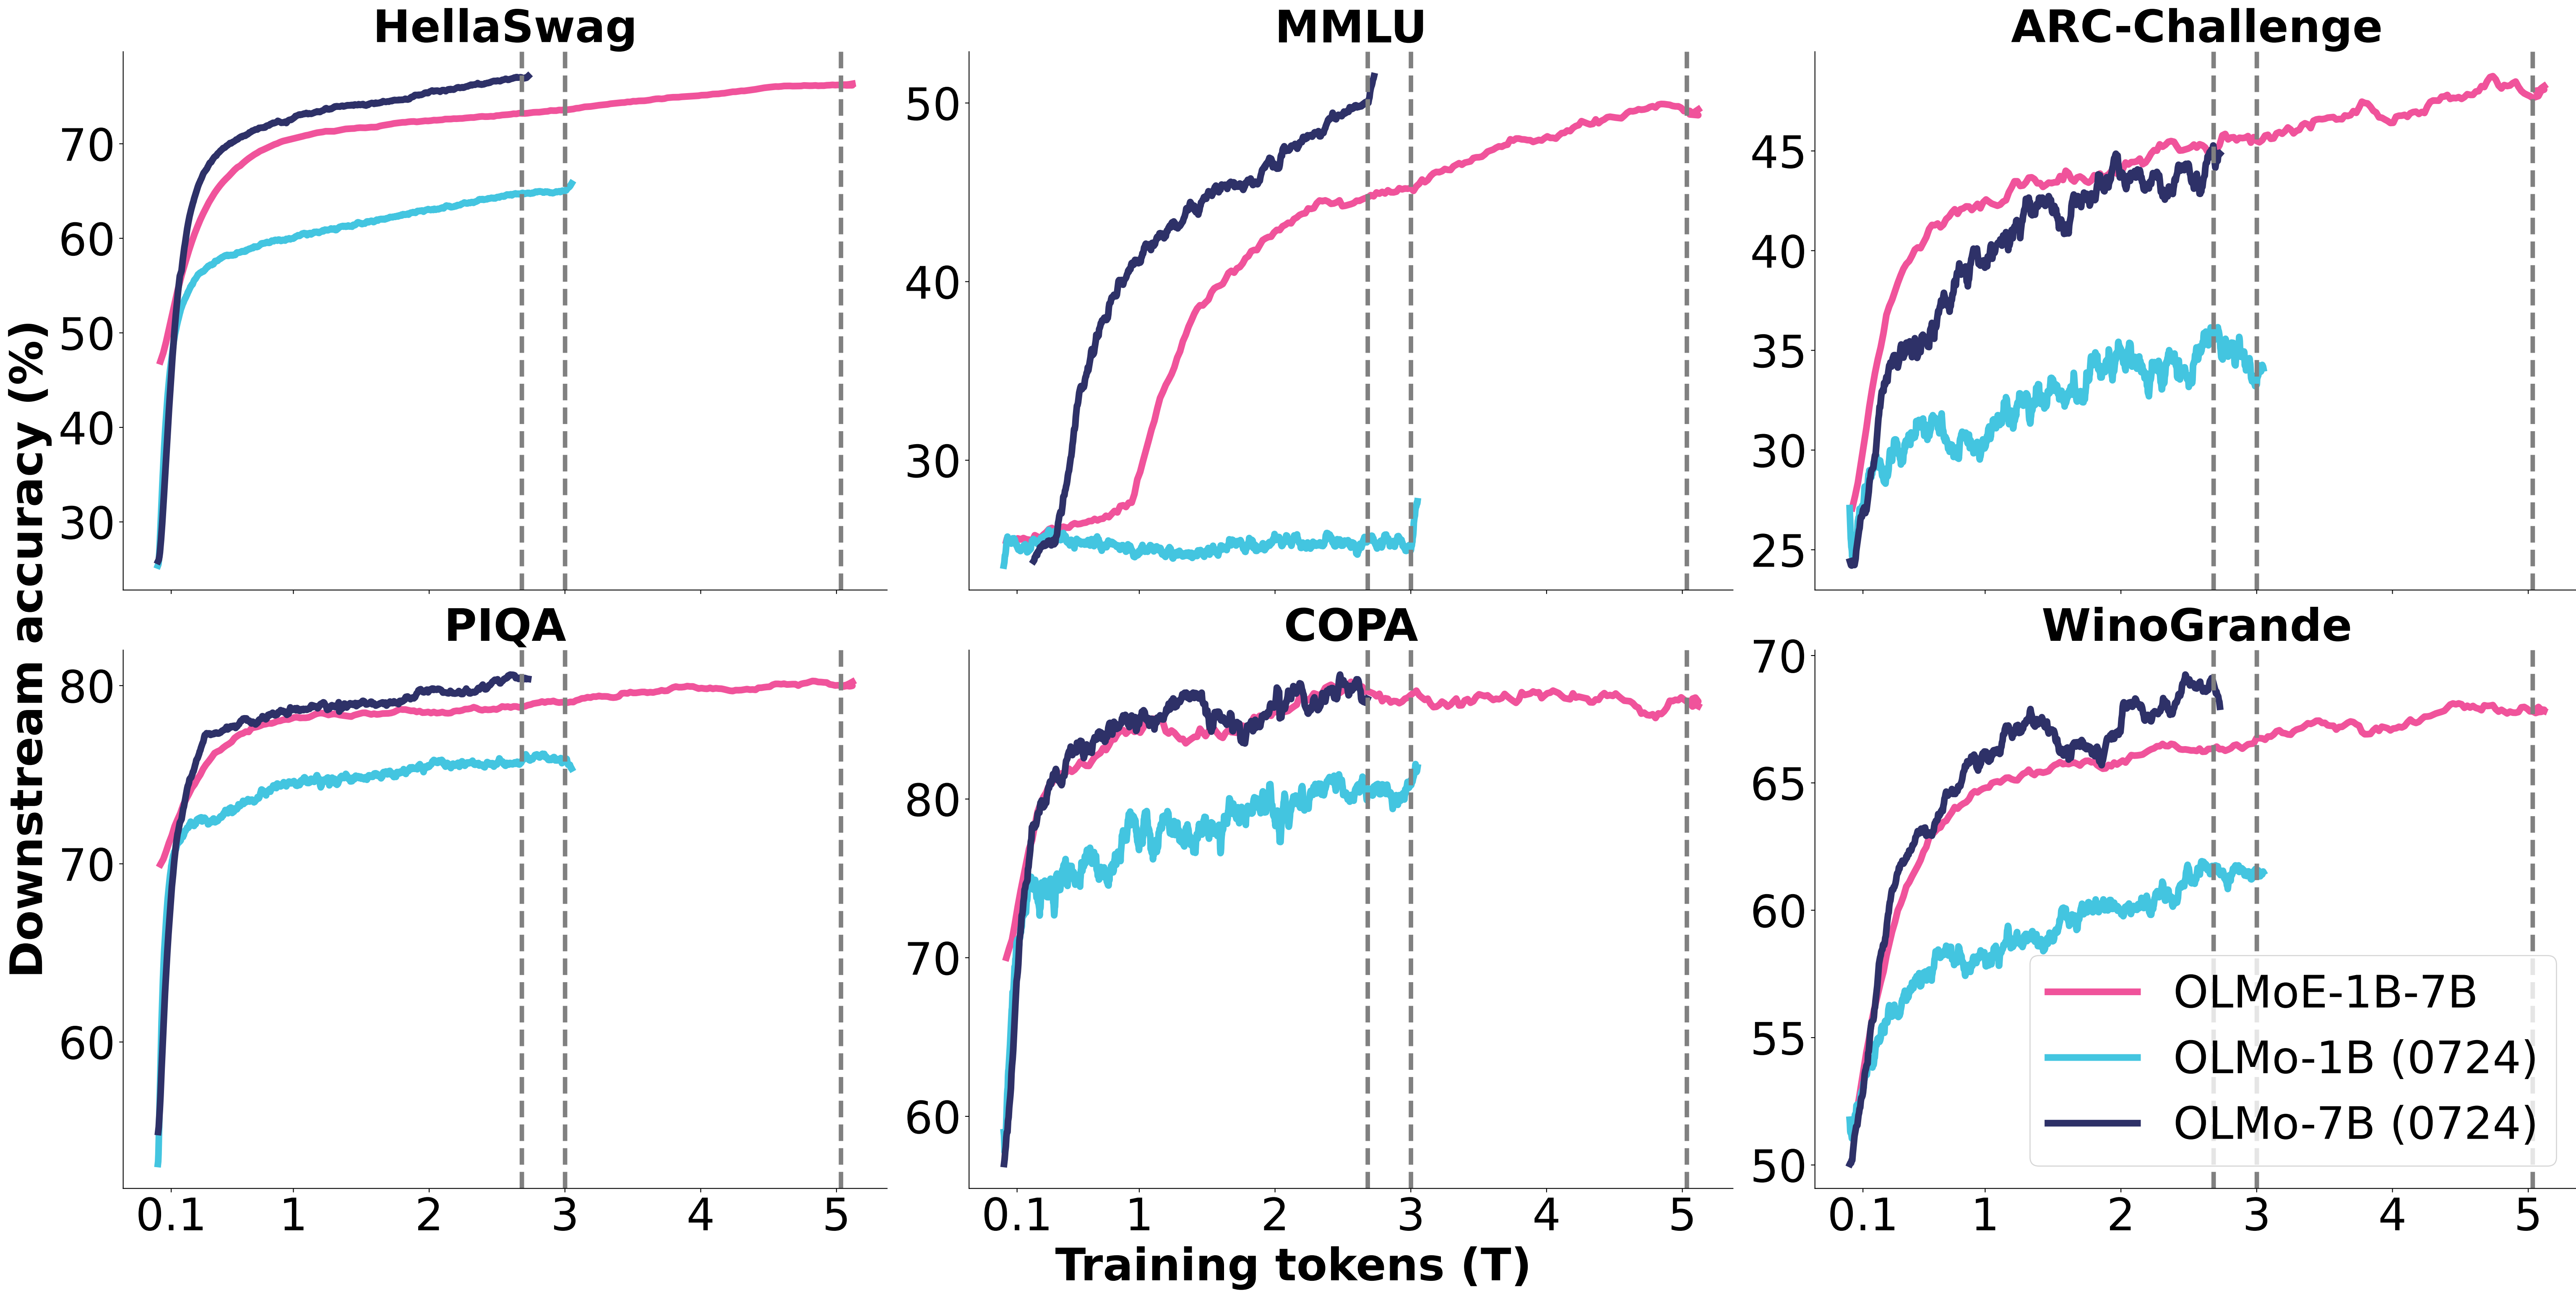

Supplement: supplementary_material [file trainingevaltokens.pdf › RoMA_Code/visuals/figures/trainingevaltokens.pdf]

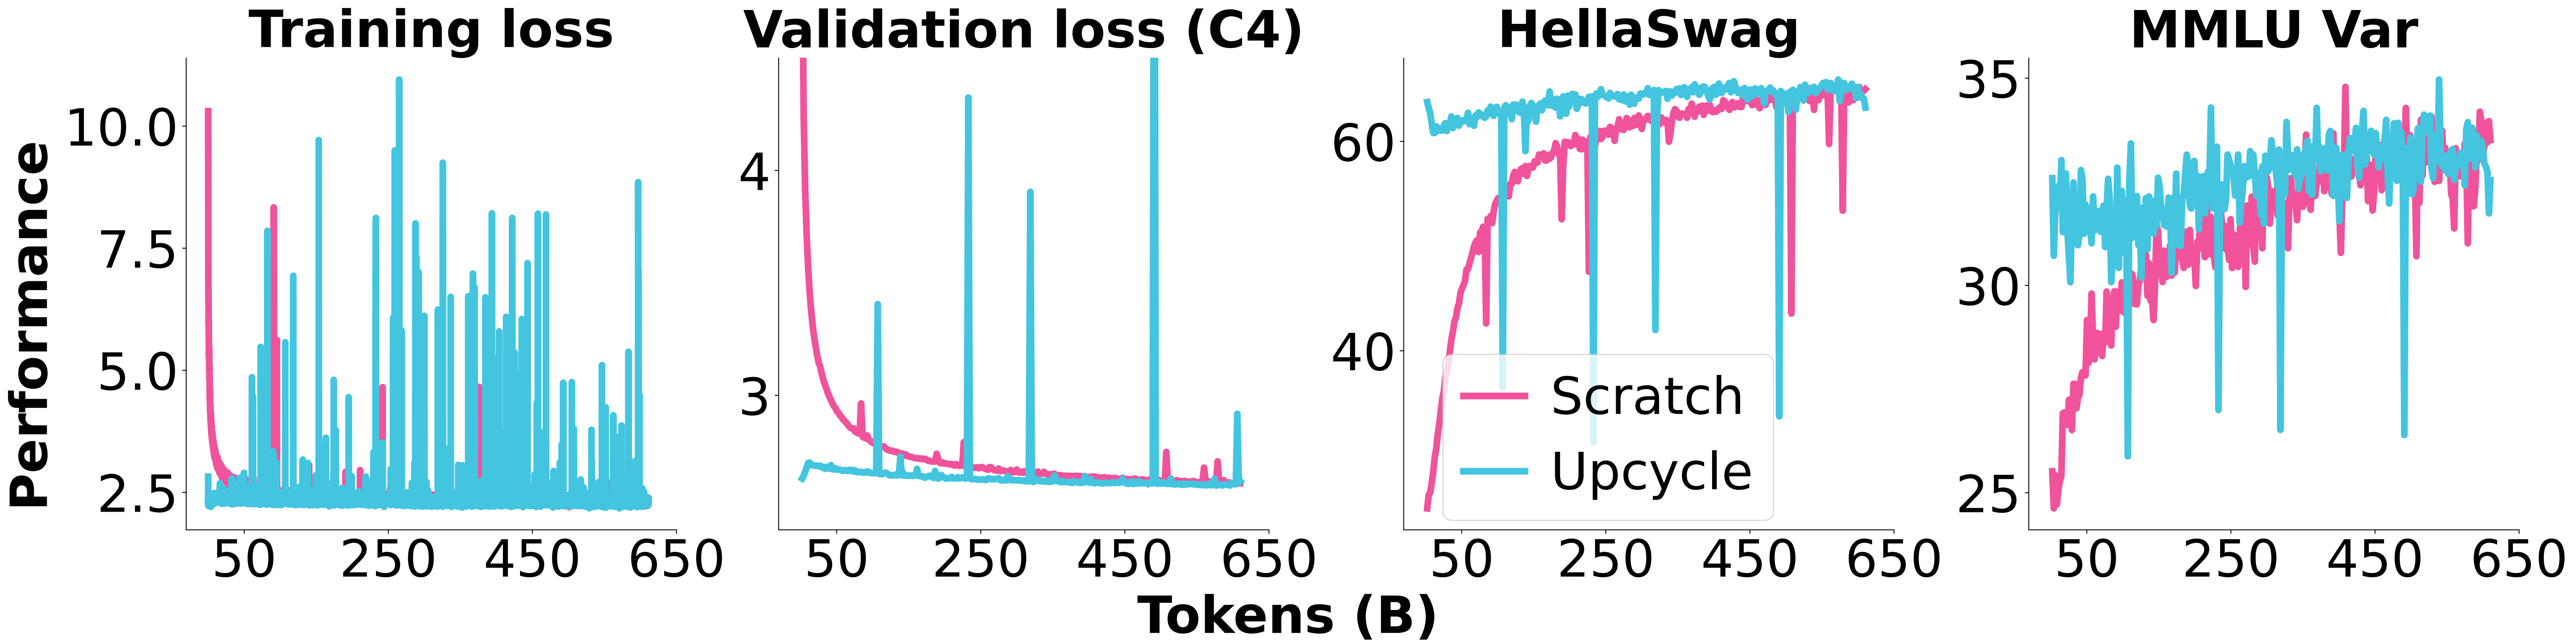

Supplement: supplementary_material [file upcycle.pdf › RoMA_Code/visuals/figures/upcycle.pdf]

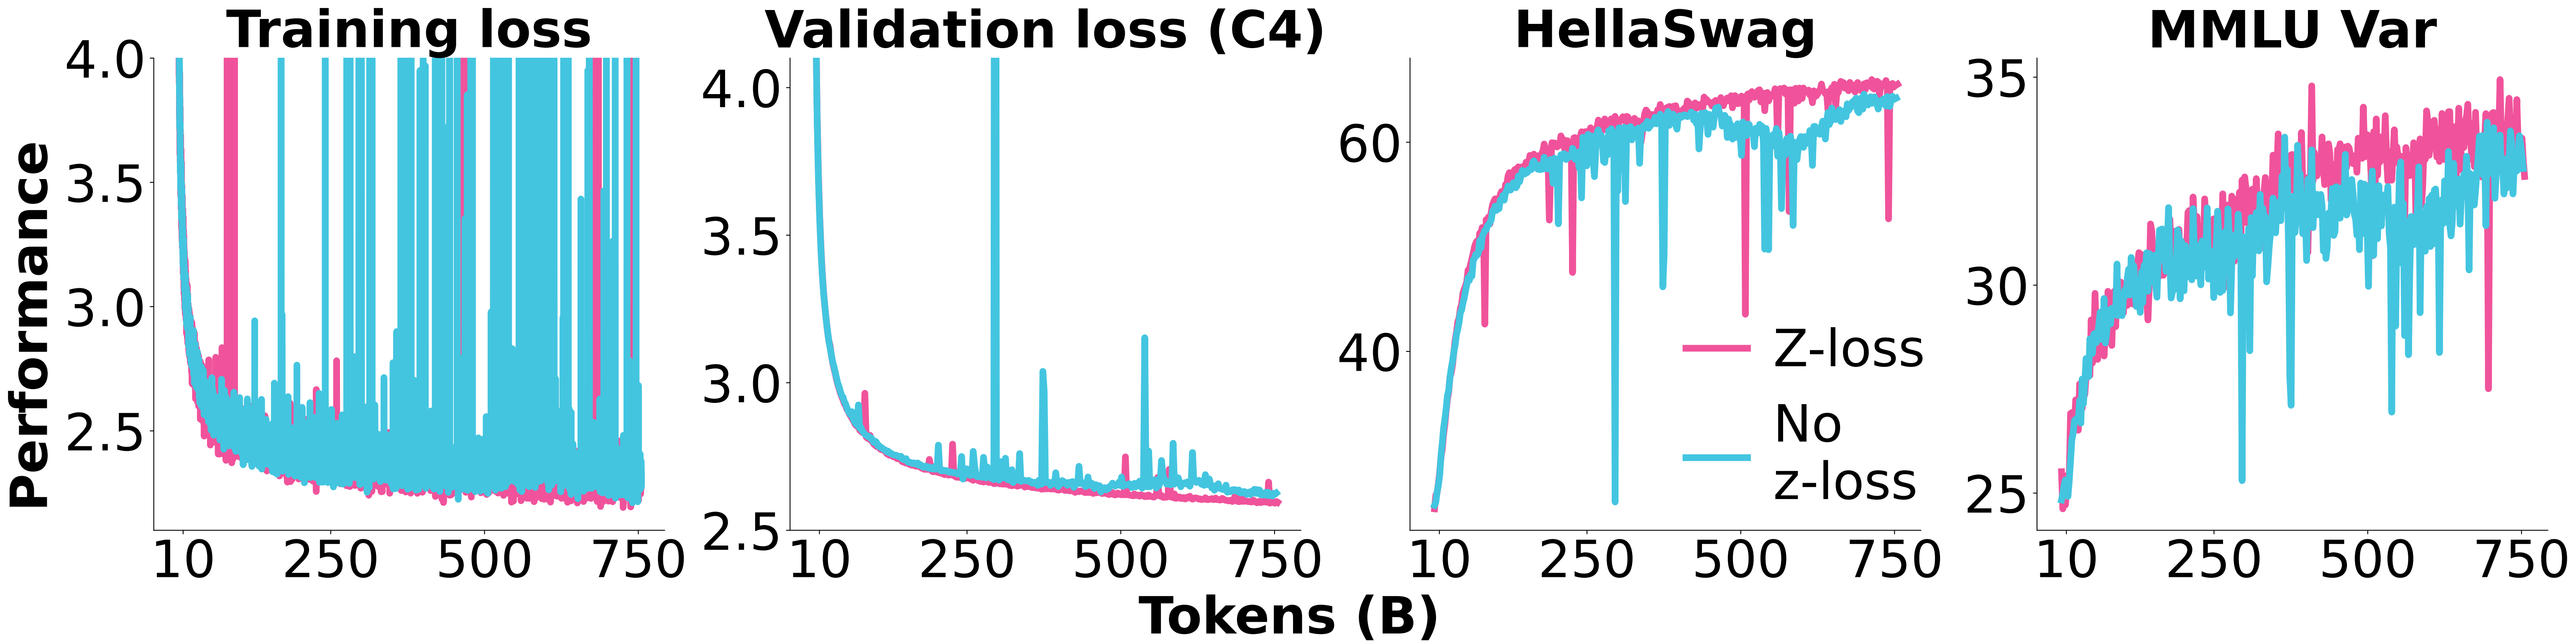

Supplement: supplementary_material [file zloss.pdf › RoMA_Code/visuals/figures/zloss.pdf]
